# Supplementary material for: Structure–property relationship of metal–organic frameworks for alcohol-based adsorption-driven heat pumps via high-throughput computational screening
Source: Royal Society of Chemistry journal article supplement (doi:10.1039/c8ta07909a), 2019-01-01
Supplement: c8ta07909a1.pdf [file c8ta07909a1.pdf]

| No. | REFCODE  | ASA (m <sup>2</sup> /g) | LCD(A) | VF   | density(g/cm <sup>3</sup> : Va(cm <sup>3</sup> /g) | crystal           | Metal type |
|-----|----------|-------------------------|--------|------|----------------------------------------------------|-------------------|------------|
| 1   | ABEXIQ   | 353.31                  | 4.71   | 0.34 | 1.79                                               | 0.11 orthorhombic | Ce         |
| 2   | GITTIN   | 1189.14                 | 11.26  | 0.50 | 1.09                                               | 0.37 cubic        | Co         |
| 3   | PAMTII   | 1894.10                 | 12.11  | 0.72 | 0.95                                               | 0.57 triclinic    | Er         |
| 4   | AXOCEW   | 1014.92                 | 7.53   | 0.54 | 1.12                                               | 0.30 other        | Zn         |
| 5   | CAXVII   | 1336.12                 | 11.64  | 0.70 | 1.12                                               | 0.51 triclinic    | Fe         |
| 6   | HOGLEV01 | 2579.99                 | 10.39  | 0.76 | 0.85                                               | 0.70 other        | Cu         |
| 7   | COYCID   | 1853.36                 | 10.04  | 0.65 | 0.93                                               | 0.56 triclinic    | Cu, Mo     |
| 8   | SAHYOQ05 | 3724.41                 | 15.12  | 0.83 | 0.59                                               | 1.28 triclinic    | Zn         |
| 9   | NINHOH   | 2413.30                 | 6.48   | 0.64 | 1.05                                               | 0.65 triclinic    | Cd         |
| 10  | KEFBEE   | 3139.92                 | 11.06  | 0.81 | 0.71                                               | 0.97 triclinic    | Zn         |
| 11  | IXOFEH   | 1397.79                 | 6.81   | 0.62 | 1.03                                               | 0.44 orthorhombic | V          |
| 12  | RAPYOY   | 2506.28                 | 5.95   | 0.69 | 0.92                                               | 0.63 monoclinic   | Zn         |
| 13  | SENWIT   | 3106.99                 | 8.36   | 0.80 | 0.78                                               | 0.92 orthorhombic | Zn         |
| 14  | RIBDEN   | 2272.99                 | 5.92   | 0.66 | 0.93                                               | 0.59 other        | Co         |
| 15  | IDIWOH   | 1585.27                 | 7.48   | 0.64 | 1.00                                               | 0.49 orthorhombic | Fe         |
| 16  | WEBKOF   | 2644.19                 | 10.38  | 0.80 | 0.85                                               | 0.72 triclinic    | In, Zn     |
| 17  | SEFBOV   | 2049.80                 | 5.44   | 0.64 | 1.03                                               | 0.46 orthorhombic | Zn         |
| 18  | AQUCOF   | 1581.29                 | 8.64   | 0.62 | 1.04                                               | 0.47 other        | Cu         |
| 19  | LOQLIN   | 1215.92                 | 14.21  | 0.71 | 0.95                                               | 0.54 other        | Ga         |
| 20  | VEXVAW   | 2550.55                 | 9.77   | 0.71 | 0.77                                               | 0.68 triclinic    | Fe         |
| 21  | OJICUG   | 3194.32                 | 8.22   | 0.73 | 0.69                                               | 0.92 other        | Sc         |
| 22  | BEPROF   | 3039.12                 | 7.99   | 0.76 | 0.73                                               | 0.77 triclinic    | Ni         |
| 23  | PARNIH   | 2203.59                 | 8.34   | 0.61 | 0.86                                               | 0.59 triclinic    | Cu         |
| 24  | NEDWAW   | 2534.92                 | 8.28   | 0.67 | 0.76                                               | 0.71 triclinic    | Mn         |
| 25  | SETQOZ   | 1635.51                 | 7.65   | 0.64 | 0.99                                               | 0.51 triclinic    | Fe         |
| 26  | OQETEK   | 2008.59                 | 9.23   | 0.75 | 0.99                                               | 0.61 other        | Yb         |
| 27  | ZIKJIO   | 2884.20                 | 7.32   | 0.74 | 0.78                                               | 0.74 triclinic    | Cu         |
| 28  | PARHEW   | 3376.62                 | 7.39   | 0.69 | 0.63                                               | 0.96 monoclinic   | Ca         |
| 29  | LARVIL   | 342.90                  | 7.28   | 0.28 | 2.22                                               | 0.11 other        | Cu         |
| 30  | ZnMOF-74 | 1277.94                 | 11.89  | 0.73 | 1.18                                               | 0.51 triclinic    | Zn         |
| 31  | ATOWOW   | 1884.98                 | 10.13  | 0.68 | 0.87                                               | 0.63 triclinic    | Zn         |
| 32  | PARHAS   | 2740.66                 | 6.94   | 0.64 | 0.70                                               | 0.77 other        | Ca         |
| 33  | SETSIV   | 3004.21                 | 10.19  | 0.77 | 0.70                                               | 0.93 other        | Cr, Zn     |
| 34  | OYEJOS   | 1890.45                 | 9.85   | 0.59 | 0.83                                               | 0.53 other        | Cu         |
| 35  | PEJMOI   | 442.12                  | 7.65   | 0.39 | 1.79                                               | 0.13 triclinic    | Cd, K      |
| 36  | HAFQUC   | 1496.47                 | 7.05   | 0.65 | 0.92                                               | 0.45 other        | Al         |
| 37  | QALGUH   | 1708.57                 | 8.51   | 0.65 | 0.99                                               | 0.52 triclinic    | Cr         |
| 38  | FUSYUO   | 620.38                  | 15.18  | 0.44 | 1.11                                               | 0.28 other        | Cd         |
| 39  | FEFCUQ   | 2501.78                 | 8.96   | 0.70 | 0.78                                               | 0.69 triclinic    | Zn         |
| 40  | WIYFAM   | 2809.91                 | 9.66   | 0.69 | 0.79                                               | 0.76 tetragonal   | Zn         |
| 41  | AMIMEP   | 1142.11                 | 10.96  | 0.56 | 0.99                                               | 0.40 triclinic    | Zn         |
| 42  | DAYYIN   | 979.50                  | 6.90   | 0.41 | 1.12                                               | 0.27 other        | Co         |
| 43  | IPIFAP   | 948.37                  | 7.07   | 0.51 | 1.44                                               | 0.30 other        | Ag         |
| 44  | NUVWIL   | 745.99                  | 8.82   | 0.40 | 1.36                                               | 0.22 other        | La, Zn     |

|    |              |         |       |      |      |      |              |        |
|----|--------------|---------|-------|------|------|------|--------------|--------|
| 45 | VEJYIT       | 1888.75 | 6.44  | 0.60 | 0.93 | 0.50 | orthorhombic | Zn     |
| 46 | ZnHBDC       | 1890.37 | 9.37  | 0.67 | 0.87 | 0.63 | other        | Zn     |
| 47 | OFODAP       | 2850.54 | 7.94  | 0.79 | 0.84 | 0.80 | orthorhombic | Cd     |
| 48 | Ni-DOBDC     | 1217.07 | 11.45 | 0.71 | 1.19 | 0.49 | triclinic    | Ni     |
| 49 | ALULID       | 2094.93 | 7.43  | 0.66 | 0.93 | 0.55 | triclinic    | Ce     |
| 50 | YIWMEW       | 1179.31 | 5.71  | 0.49 | 1.31 | 0.37 | orthorhombic | Cd     |
| 51 | MODNIC       | 453.02  | 5.20  | 0.47 | 1.36 | 0.11 | orthorhombic | Cd     |
| 52 | LEJBUX       | 2385.18 | 6.29  | 0.64 | 1.05 | 0.62 | monoclinic   | Cd     |
| 53 | IFASOZ       | 2309.01 | 9.73  | 0.63 | 0.75 | 0.72 | triclinic    | Mg     |
| 54 | RIVDEF       | 690.89  | 4.76  | 0.32 | 1.30 | 0.15 | other        | B, Cd  |
| 55 | KIVDUP       | 1411.07 | 6.94  | 0.52 | 1.36 | 0.35 | triclinic    | Gd     |
| 56 | RABHIH       | 2102.01 | 6.97  | 0.52 | 0.93 | 0.48 | orthorhombic | Cd, Ni |
| 57 | SAKRED       | 1953.82 | 5.35  | 0.63 | 1.03 | 0.46 | orthorhombic | Zn     |
| 58 | VEMMAC       | 2142.18 | 6.82  | 0.68 | 0.88 | 0.61 | triclinic    | Zn     |
| 59 | WEZCIO       | 721.83  | 8.73  | 0.39 | 1.34 | 0.22 | other        | Co, La |
| 60 | SETQUF       | 1640.31 | 7.65  | 0.64 | 0.99 | 0.50 | triclinic    | Fe     |
| 61 | KIVFAX       | 1402.34 | 6.93  | 0.52 | 1.39 | 0.34 | triclinic    | Dy     |
| 62 | SAQQIL       | 1766.39 | 11.46 | 0.72 | 0.92 | 0.60 | triclinic    | Er     |
| 63 | IVETOT       | 2417.41 | 10.10 | 0.68 | 0.68 | 0.80 | orthorhombic | Cu     |
| 64 | MIBQAR16     | 3673.58 | 15.02 | 0.84 | 0.60 | 1.27 | triclinic    | Zn     |
| 65 | Mg-DOBDC     | 1609.06 | 11.70 | 0.74 | 0.92 | 0.64 | triclinic    | Mg     |
| 66 | KEVWUF       | 1759.92 | 9.36  | 0.65 | 1.04 | 0.51 | triclinic    | La     |
| 67 | SAQQEH       | 1782.90 | 11.42 | 0.73 | 0.91 | 0.60 | triclinic    | Ho     |
| 68 | SERJUV       | 1101.00 | 8.65  | 0.54 | 1.18 | 0.34 | orthorhombic | Y      |
| 69 | YILJAG       | 2785.31 | 9.73  | 0.68 | 0.79 | 0.75 | tetragonal   | Zn     |
| 70 | ATOWIQ       | 1909.86 | 9.37  | 0.67 | 0.87 | 0.63 | triclinic    | Zn     |
| 71 | OBUBOC       | 697.44  | 8.46  | 0.40 | 1.46 | 0.21 | other        | Ce, Cu |
| 72 | HIHNUJ       | 2745.73 | 7.99  | 0.83 | 0.81 | 0.80 | other        | In     |
| 73 | SEQSOY       | 1262.15 | 6.05  | 0.62 | 1.01 | 0.35 | other        | Co     |
| 74 | SOHGUS       | 2327.07 | 9.42  | 0.71 | 0.72 | 0.77 | monoclinic   | Co     |
| 75 | XAVDEF_clean | 1614.46 | 7.70  | 0.65 | 0.99 | 0.49 | orthorhombic | V      |
| 76 | TONQOD       | 3134.62 | 8.87  | 0.77 | 0.73 | 0.80 | triclinic    | Zn     |
| 77 | IXOFAD       | 1532.10 | 7.01  | 0.64 | 1.01 | 0.49 | orthorhombic | V      |
| 78 | EDOMAM       | 2368.97 | 8.35  | 0.69 | 0.81 | 0.65 | triclinic    | Cu     |
| 79 | MURCAD       | 757.15  | 4.40  | 0.54 | 1.19 | 0.21 | triclinic    | Cu     |
| 80 | IXOFUX       | 1611.44 | 6.83  | 0.64 | 1.00 | 0.48 | orthorhombic | V      |
| 81 | ATIJJU       | 1603.50 | 17.44 | 0.63 | 0.75 | 0.76 | triclinic    | Co     |
| 82 | AROFET       | 2377.59 | 8.41  | 0.69 | 0.86 | 0.64 | triclinic    | Cd     |
| 83 | TERFUT       | 1976.81 | 8.07  | 0.70 | 0.90 | 0.57 | triclinic    | Rh, Zn |
| 84 | KEFBOO       | 3061.69 | 12.62 | 0.80 | 0.72 | 0.94 | triclinic    | Zn     |
| 85 | SAKRAZ       | 2001.36 | 5.38  | 0.64 | 1.04 | 0.47 | orthorhombic | Zn     |
| 86 | XOVVOU       | 1568.61 | 6.22  | 0.61 | 1.07 | 0.43 | triclinic    | Zn     |
| 87 | BEPRIZ       | 2538.98 | 10.21 | 0.73 | 0.76 | 0.71 | triclinic    | Co     |
| 88 | GUBVUU       | 1486.83 | 6.58  | 0.56 | 0.93 | 0.38 | triclinic    | Co     |
| 89 | RIBTAZ       | 2809.34 | 7.70  | 0.75 | 0.88 | 0.67 | other        | Cu     |

|     |              |         |       |      |      |      |              |        |
|-----|--------------|---------|-------|------|------|------|--------------|--------|
| 90  | UKIQIP       | 2376.77 | 10.53 | 0.69 | 0.82 | 0.66 | triclinic    | Mn     |
| 91  | YURKAY       | 2660.90 | 8.03  | 0.75 | 0.86 | 0.69 | triclinic    | Dy     |
| 92  | VEJYIT01     | 1908.77 | 6.61  | 0.61 | 0.92 | 0.52 | orthorhombic | Zn     |
| 93  | IDIWOH       | 1557.74 | 7.48  | 0.64 | 1.00 | 0.49 | orthorhombic | V      |
| 94  | FAYKOH       | 2624.90 | 9.83  | 0.80 | 0.83 | 0.71 | triclinic    | In     |
| 95  | PEPLEC       | 1366.67 | 6.96  | 0.61 | 1.03 | 0.44 | orthorhombic | V      |
| 96  | KANMIX       | 1189.41 | 9.79  | 0.61 | 1.08 | 0.37 | other        | Cu     |
| 97  | VEJYIT       | 1873.70 | 6.44  | 0.60 | 0.93 | 0.50 | orthorhombic | Zn     |
| 98  | TERFIH       | 1396.75 | 8.72  | 0.68 | 1.20 | 0.39 | triclinic    | Ir, Zn |
| 99  | HEBZEV       | 653.39  | 7.74  | 0.47 | 1.46 | 0.21 | other        | Zn     |
| 100 | IJOMOJ04     | 401.75  | 4.93  | 0.28 | 1.62 | 0.15 | other        | Mn     |
| 101 | PEPLIG       | 1363.83 | 6.52  | 0.59 | 1.05 | 0.44 | orthorhombic | V      |
| 102 | XEGKOL       | 1291.94 | 7.80  | 0.52 | 1.12 | 0.36 | triclinic    | Gd     |
| 103 | CUVTUJ       | 1222.81 | 11.68 | 0.71 | 1.18 | 0.49 | other        | Co     |
| 104 | OFUYUL       | 1276.68 | 6.43  | 0.60 | 1.09 | 0.37 | other        | Zn     |
| 105 | FANWOI       | 1126.21 | 9.90  | 0.47 | 1.00 | 0.36 | other        | Zn     |
| 106 | MUVHER       | 527.26  | 5.68  | 0.52 | 0.98 | 0.15 | orthorhombic | Zn     |
| 107 | IXAKAU       | 3034.90 | 6.43  | 0.72 | 0.78 | 0.73 | other        | Cu     |
| 108 | XEGKEB       | 1659.21 | 7.79  | 0.60 | 1.06 | 0.43 | triclinic    | Gd     |
| 109 | CAXWEF       | 1335.22 | 11.60 | 0.70 | 1.14 | 0.50 | triclinic    | Fe     |
| 110 | COJHIT       | 2285.60 | 10.05 | 0.72 | 0.72 | 0.83 | orthorhombic | Co     |
| 111 | IRMOF-6      | 3175.16 | 15.72 | 0.80 | 0.65 | 1.07 | rhombohedral | Zn     |
| 112 | XEBHOC       | 4603.79 | 12.36 | 0.86 | 0.47 | 1.66 | triclinic    | Cu     |
| 113 | XAWVUN       | 4693.30 | 10.48 | 0.86 | 0.46 | 1.65 | other        | Cu     |
| 114 | ANUGIA       | 3789.31 | 13.83 | 0.85 | 0.57 | 1.28 | triclinic    | Cu     |
| 115 | RUVKAV       | 3625.14 | 11.94 | 0.83 | 0.60 | 1.22 | triclinic    | Cu     |
| 116 | YUGLES       | 3068.72 | 10.87 | 0.81 | 0.72 | 0.96 | triclinic    | Cu     |
| 117 | NUTQAV       | 3065.96 | 10.87 | 0.80 | 0.72 | 0.94 | triclinic    | Cu     |
| 118 | FEFDEB       | 3487.64 | 13.11 | 0.79 | 0.54 | 1.31 | other        | Zn     |
| 119 | SUKYIH       | 3884.07 | 9.65  | 0.82 | 0.60 | 1.20 | tetragonal   | Cu     |
| 120 | MIL-88C-open | 3909.29 | 13.74 | 0.80 | 0.51 | 1.42 | other        | Zn     |
| 121 | MOXNUJ       | 2433.75 | 7.57  | 0.65 | 0.75 | 0.66 | triclinic    | Cu     |
| 122 | LUYHAP       | 3563.10 | 12.04 | 0.83 | 0.62 | 1.15 | triclinic    | Cu     |
| 123 | EGEJIK       | 2929.66 | 10.14 | 0.73 | 0.68 | 0.89 | triclinic    | Zn     |
| 124 | FUNCEX       | 3490.97 | 13.22 | 0.81 | 0.54 | 1.30 | monoclinic   | Zn     |
| 125 | BICDAU       | 3557.38 | 12.31 | 0.84 | 0.65 | 1.10 | other        | Zn     |
| 126 | DOTSOV42     | 2123.08 | 13.32 | 0.75 | 0.88 | 0.71 | other        | Cu     |
| 127 | HIGRIA       | 3509.08 | 11.40 | 0.83 | 0.65 | 1.09 | other        | Co, Zn |
| 128 | XADDIR       | 2223.93 | 13.26 | 0.76 | 0.87 | 0.72 | triclinic    | Cu     |
| 129 | ECOLEP       | 4555.23 | 11.30 | 0.89 | 0.41 | 2.07 | cubic        | Co     |
| 130 | DOTSOV05     | 2137.87 | 13.28 | 0.76 | 0.89 | 0.72 | triclinic    | Cu     |
| 131 | ZECKOJ       | 3189.83 | 10.56 | 0.77 | 0.67 | 1.06 | triclinic    | Cu     |
| 132 | NAYGUR       | 2683.46 | 7.69  | 0.67 | 0.75 | 0.76 | orthorhombic | Cu     |
| 133 | DOTSOV07     | 2139.34 | 13.28 | 0.76 | 0.89 | 0.72 | triclinic    | Cu     |
| 134 | DOTSOV25     | 2135.61 | 13.27 | 0.76 | 0.89 | 0.72 | triclinic    | Cu     |

|     |          |         |       |      |      |      |              |        |
|-----|----------|---------|-------|------|------|------|--------------|--------|
| 135 | DOTSOV34 | 2139.07 | 13.24 | 0.76 | 0.89 | 0.72 | triclinic    | Cu     |
| 136 | DOTSOV32 | 2132.90 | 13.25 | 0.76 | 0.89 | 0.71 | triclinic    | Cu     |
| 137 | DOTSOV24 | 2137.33 | 13.28 | 0.76 | 0.89 | 0.72 | triclinic    | Cu     |
| 138 | LURGEL   | 4373.64 | 9.80  | 0.79 | 0.53 | 1.29 | orthorhombic | Si, Zn |
| 139 | IKETOH   | 2183.60 | 13.21 | 0.75 | 0.88 | 0.70 | triclinic    | Cu     |
| 140 | FUNBOG   | 3338.88 | 12.57 | 0.80 | 0.58 | 1.23 | monoclinic   | Zn     |
| 141 | FIQCEN   | 2188.76 | 13.20 | 0.76 | 0.88 | 0.73 | other        | Cu     |
| 142 | UTEWUM   | 1765.50 | 15.00 | 0.81 | 0.74 | 0.70 | cubic        | Cu     |
| 143 | SONVEX   | 2164.71 | 13.21 | 0.76 | 0.88 | 0.71 | triclinic    | Cu     |
| 144 | DIDDOK   | 4698.19 | 10.07 | 0.82 | 0.53 | 1.35 | triclinic    | Zn     |
| 145 | YURJUR   | 2832.38 | 13.69 | 0.76 | 0.68 | 0.96 | other        | Ce     |
| 146 | DOTSOV18 | 2143.29 | 13.29 | 0.76 | 0.89 | 0.72 | triclinic    | Cu     |
| 147 | DOTSOV03 | 2136.43 | 13.27 | 0.76 | 0.89 | 0.71 | triclinic    | Cu     |
| 148 | IRMOF-7  | 3335.65 | 11.55 | 0.78 | 0.71 | 0.93 | cubic        | Cd     |
| 149 | SOYWOT   | 2180.15 | 13.18 | 0.76 | 0.88 | 0.71 | triclinic    | Cu     |
| 150 | DOTSOV20 | 2140.69 | 13.28 | 0.76 | 0.89 | 0.72 | triclinic    | Cu     |
| 151 | DOTSOV12 | 2143.02 | 13.29 | 0.76 | 0.89 | 0.72 | triclinic    | Cu     |
| 152 | HIFVUO   | 2392.47 | 7.50  | 0.63 | 0.82 | 0.65 | tetragonal   | Zn     |
| 153 | DOTSOV23 | 2141.46 | 13.28 | 0.76 | 0.89 | 0.72 | triclinic    | Cu     |
| 154 | DOTSOV08 | 2142.28 | 13.28 | 0.76 | 0.89 | 0.72 | triclinic    | Cu     |
| 155 | DOTSOV06 | 2139.35 | 13.28 | 0.76 | 0.89 | 0.72 | triclinic    | Cu     |
| 156 | XAMDUM07 | 2150.71 | 13.24 | 0.76 | 0.87 | 0.73 | triclinic    | Cu     |
| 157 | XADDEN   | 2219.32 | 13.25 | 0.76 | 0.88 | 0.71 | triclinic    | Cu     |
| 158 | DOTSOV02 | 2134.01 | 13.27 | 0.76 | 0.89 | 0.71 | triclinic    | Cu     |
| 159 | TEDGOA   | 3311.36 | 8.47  | 0.77 | 0.69 | 0.97 | other        | Zn     |
| 160 | DOTSOV33 | 2138.33 | 13.25 | 0.76 | 0.89 | 0.72 | triclinic    | Cu     |
| 161 | DOTSOV15 | 2142.93 | 13.29 | 0.76 | 0.89 | 0.72 | triclinic    | Cu     |
| 162 | DOTSOV29 | 2142.01 | 13.27 | 0.76 | 0.89 | 0.72 | triclinic    | Cu     |
| 163 | XAMHEA   | 2800.52 | 9.14  | 0.68 | 0.73 | 0.74 | other        | Zn     |
| 164 | DOTSOV35 | 2137.78 | 13.23 | 0.76 | 0.89 | 0.71 | triclinic    | Cu     |
| 165 | LOJFUL   | 3042.67 | 11.90 | 0.76 | 0.61 | 0.97 | triclinic    | Na, Zn |
| 166 | XAMDUM   | 2139.35 | 13.22 | 0.76 | 0.88 | 0.72 | triclinic    | Cu     |
| 167 | DOTSOV38 | 2133.23 | 13.21 | 0.76 | 0.89 | 0.71 | triclinic    | Cu     |
| 168 | DOTSOV10 | 2142.07 | 13.29 | 0.76 | 0.89 | 0.72 | triclinic    | Cu     |
| 169 | DOTSOV22 | 2139.36 | 13.28 | 0.76 | 0.89 | 0.72 | triclinic    | Cu     |
| 170 | DOTSOV41 | 2131.52 | 13.21 | 0.76 | 0.89 | 0.71 | other        | Cu     |
| 171 | DOTSOV13 | 2144.19 | 13.29 | 0.76 | 0.89 | 0.72 | triclinic    | Cu     |
| 172 | RAPYUE   | 2912.56 | 8.05  | 0.73 | 0.86 | 0.76 | monoclinic   | Zn     |
| 173 | DOTSOV04 | 2139.55 | 13.28 | 0.76 | 0.89 | 0.72 | triclinic    | Cu     |
| 174 | DOTSOV21 | 2140.21 | 13.28 | 0.76 | 0.89 | 0.72 | triclinic    | Cu     |
| 175 | MOYYIJ   | 2863.42 | 12.42 | 0.72 | 0.73 | 0.83 | triclinic    | Cu     |
| 176 | DOTSOV31 | 2130.14 | 13.26 | 0.76 | 0.89 | 0.71 | triclinic    | Cu     |
| 177 | DOTSOV11 | 2144.46 | 13.29 | 0.76 | 0.89 | 0.72 | triclinic    | Cu     |
| 178 | XAMDUM04 | 2100.05 | 12.95 | 0.76 | 0.92 | 0.69 | triclinic    | Cu     |
| 179 | NUTQEZ   | 2786.40 | 12.12 | 0.79 | 0.76 | 0.87 | triclinic    | Cu     |

|     |          |         |       |      |      |      |              |        |
|-----|----------|---------|-------|------|------|------|--------------|--------|
| 180 | KAMZUV   | 1366.26 | 11.32 | 0.49 | 0.90 | 0.48 | triclinic    | Zn     |
| 181 | ZIF-6    | 2759.18 | 9.72  | 0.67 | 0.76 | 0.75 | tetragonal   | Zn     |
| 182 | DOTSOV09 | 2140.93 | 13.28 | 0.76 | 0.89 | 0.72 | triclinic    | Cu     |
| 183 | IYIHUU   | 3059.46 | 11.94 | 0.75 | 0.63 | 1.03 | monoclinic   | Zn     |
| 184 | DOTSOV19 | 2140.05 | 13.28 | 0.76 | 0.89 | 0.72 | triclinic    | Cu     |
| 185 | DOTSOV26 | 2136.45 | 13.27 | 0.76 | 0.89 | 0.72 | triclinic    | Cu     |
| 186 | DOTSOV14 | 2143.52 | 13.29 | 0.76 | 0.89 | 0.72 | triclinic    | Cu     |
| 187 | XAMDUM05 | 2142.56 | 13.12 | 0.77 | 0.90 | 0.71 | triclinic    | Cu     |
| 188 | DOTSOV28 | 2133.75 | 13.27 | 0.76 | 0.89 | 0.72 | triclinic    | Cu     |
| 189 | XAMDUM01 | 2127.80 | 13.20 | 0.76 | 0.88 | 0.72 | triclinic    | Cu     |
| 190 | DOTSOV40 | 2137.10 | 13.21 | 0.76 | 0.89 | 0.72 | triclinic    | Cu     |
| 191 | DOTSOV16 | 2143.41 | 13.29 | 0.76 | 0.89 | 0.72 | triclinic    | Cu     |
| 192 | DOTSOV27 | 2135.47 | 13.27 | 0.76 | 0.89 | 0.72 | triclinic    | Cu     |
| 193 | MUWQEB   | 1733.12 | 15.70 | 0.76 | 0.72 | 0.70 | cubic        | Fe     |
| 194 | FUNBEW   | 2997.87 | 11.78 | 0.77 | 0.67 | 0.99 | orthorhombic | Zn     |
| 195 | XAMDUM03 | 2128.16 | 13.17 | 0.76 | 0.89 | 0.71 | triclinic    | Cu     |
| 196 | SONVIB   | 2156.39 | 13.20 | 0.76 | 0.88 | 0.72 | triclinic    | Cu     |
| 197 | FERHAN   | 2236.31 | 10.24 | 0.69 | 0.78 | 0.65 | triclinic    | Zn     |
| 198 | TEDHAN   | 2136.81 | 10.02 | 0.65 | 0.90 | 0.62 | triclinic    | Zn     |
| 199 | NIGBOW   | 2527.83 | 11.78 | 0.72 | 0.65 | 0.97 | triclinic    | V      |
| 200 | XAMDUM06 | 2135.95 | 13.17 | 0.76 | 0.88 | 0.72 | triclinic    | Cu     |
| 201 | SONVAT   | 2207.39 | 13.19 | 0.76 | 0.88 | 0.71 | triclinic    | Cu     |
| 202 | DOTSOV30 | 2131.84 | 13.26 | 0.76 | 0.89 | 0.72 | triclinic    | Cu     |
| 203 | ODIXEG   | 4097.81 | 10.41 | 0.84 | 0.55 | 1.32 | tetragonal   | Si, Zn |
| 204 | TUDJOS   | 1479.94 | 11.49 | 0.54 | 0.91 | 0.45 | cubic        | Zn     |
| 205 | WOLRIZ   | 2133.13 | 11.02 | 0.75 | 0.93 | 0.68 | triclinic    | Cu     |
| 206 | DOTSOV37 | 2145.04 | 13.21 | 0.76 | 0.89 | 0.72 | triclinic    | Cu     |
| 207 | HIFGIO   | 2185.66 | 12.58 | 0.70 | 0.73 | 0.81 | triclinic    | Zn     |
| 208 | XINWUO   | 1658.33 | 6.78  | 0.55 | 1.10 | 0.43 | triclinic    | Zn     |
| 209 | XADCOW   | 1443.57 | 14.11 | 0.67 | 0.87 | 0.60 | other        | Fe     |
| 210 | OFAWEZ   | 2183.59 | 11.75 | 0.80 | 0.98 | 0.72 | triclinic    | Hf     |
| 211 | AGAXOV   | 2778.92 | 6.88  | 0.73 | 0.89 | 0.68 | triclinic    | Cu     |
| 212 | HIFVOI   | 2255.12 | 9.00  | 0.60 | 0.85 | 0.58 | other        | Zn     |
| 213 | OFAWAV   | 2201.68 | 12.26 | 0.80 | 0.97 | 0.73 | triclinic    | Hf     |
| 214 | BIBXUH   | 2562.42 | 14.76 | 0.76 | 0.74 | 0.82 | other        | Ni     |
| 215 | NEGGOX   | 1378.18 | 5.94  | 0.47 | 1.05 | 0.49 | triclinic    | Mn     |
| 216 | CUNFOH   | 992.43  | 9.51  | 0.53 | 1.64 | 0.29 | triclinic    | Cu     |
| 217 | ZIF-3    | 2070.29 | 8.47  | 0.59 | 0.88 | 0.52 | other        | Zn     |
| 218 | KECRAL10 | 2412.26 | 7.03  | 0.65 | 1.05 | 0.67 | monoclinic   | Cd     |
| 219 | TAQGEZ   | 1874.67 | 8.33  | 0.67 | 0.93 | 0.60 | triclinic    | Cd     |
| 220 | ALAMUW   | 3528.79 | 11.50 | 0.82 | 0.65 | 1.06 | triclinic    | Cu     |
| 221 | LOQLEJ   | 1251.98 | 15.56 | 0.72 | 0.99 | 0.54 | other        | In     |
| 222 | CUNFOH01 | 953.25  | 8.65  | 0.52 | 1.65 | 0.28 | triclinic    | Cu     |
| 223 | RAYMAG   | 2228.80 | 6.11  | 0.65 | 0.85 | 0.55 | triclinic    | Co     |
| 224 | NEDWIE   | 2965.03 | 9.20  | 0.72 | 0.68 | 0.90 | triclinic    | Mn, Ni |

|     |              |         |       |      |      |      |              |        |
|-----|--------------|---------|-------|------|------|------|--------------|--------|
| 225 | AXUBAW       | 2328.29 | 14.25 | 0.67 | 0.74 | 0.77 | triclinic    | Zn     |
| 226 | DANZOJ       | 1362.39 | 11.32 | 0.59 | 0.95 | 0.42 | triclinic    | Mn     |
| 227 | FINQOK       | 987.71  | 8.77  | 0.52 | 1.40 | 0.29 | triclinic    | Ag     |
| 228 | FEWTUY       | 3169.65 | 9.07  | 0.75 | 0.66 | 0.94 | triclinic    | Ni     |
| 229 | WAHMUP       | 1457.87 | 6.91  | 0.48 | 0.93 | 0.46 | triclinic    | Cu     |
| 230 | SOBZOY       | 1071.65 | 5.32  | 0.43 | 1.13 | 0.36 | monoclinic   | Cd, Ni |
| 231 | ALULAV       | 5005.69 | 8.90  | 0.83 | 0.59 | 1.24 | triclinic    | Gd     |
| 232 | DAPBIH       | 1379.20 | 11.15 | 0.61 | 0.99 | 0.42 | triclinic    | Co     |
| 233 | CIFMEL       | 3429.00 | 8.29  | 0.77 | 0.76 | 0.91 | cubic        | Co     |
| 234 | WONZOP       | 2766.87 | 11.00 | 0.72 | 0.65 | 0.96 | triclinic    | Si, Zn |
| 235 | ALUKIC       | 5203.69 | 8.97  | 0.83 | 0.57 | 1.30 | triclinic    | Ce     |
| 236 | ATOTIM       | 1512.86 | 13.93 | 0.68 | 0.86 | 0.60 | other        | V      |
| 237 | ONIXOZ       | 1999.54 | 9.49  | 0.73 | 0.91 | 0.58 | other        | Cu     |
| 238 | UTEWOG       | 1722.50 | 14.59 | 0.81 | 0.75 | 0.66 | cubic        | Ni     |
| 239 | LUNBIF       | 1189.99 | 8.31  | 0.65 | 1.87 | 0.33 | orthorhombic | W, Zn  |
| 240 | FECZAQ       | 1725.19 | 8.46  | 0.61 | 0.98 | 0.43 | orthorhombic | Zn     |
| 241 | SENWOZ       | 3117.45 | 8.77  | 0.81 | 0.74 | 0.99 | orthorhombic | Zn     |
| 242 | VUSKEA       | 3683.86 | 14.96 | 0.83 | 0.59 | 1.26 | triclinic    | Zn     |
| 243 | SENWAL       | 3118.16 | 8.58  | 0.82 | 0.73 | 1.00 | orthorhombic | Zn     |
| 244 | YARYEV       | 1537.22 | 5.03  | 0.46 | 1.12 | 0.46 | other        | Cd     |
| 245 | WONZUV       | 3226.29 | 11.46 | 0.76 | 0.61 | 1.06 | triclinic    | Si, Zn |
| 246 | Co26NDP      | 2568.18 | 11.19 | 0.76 | 0.65 | 0.93 | other        | Co     |
| 247 | FINQUQ       | 977.96  | 8.72  | 0.51 | 1.42 | 0.27 | triclinic    | Ag     |
| 248 | GUPCUQ01     | 1235.90 | 13.05 | 0.57 | 1.14 | 0.43 | cubic        | Cd     |
| 249 | MIL-88A-open | 2656.67 | 7.38  | 0.61 | 0.90 | 0.65 | other        | Fe     |
| 250 | EKOPUQ       | 1414.39 | 11.06 | 0.52 | 0.97 | 0.41 | other        | Ca, Cd |
| 251 | MOCKAR       | 2957.15 | 10.82 | 0.83 | 0.75 | 0.91 | triclinic    | Cu     |
| 252 | JEJWOL       | 3299.27 | 10.01 | 0.80 | 0.65 | 1.03 | triclinic    | Nd     |
| 253 | LOWQIX       | 2299.87 | 8.44  | 0.72 | 0.90 | 0.70 | other        | Zn     |
| 254 | CIDKUX       | 1471.17 | 9.09  | 0.61 | 1.05 | 0.47 | triclinic    | Cu     |
| 255 | BUVYIB       | 2649.22 | 11.54 | 0.71 | 0.70 | 0.77 | triclinic    | Fe     |
| 256 | HIFTOG       | 1155.76 | 7.93  | 0.57 | 1.17 | 0.28 | triclinic    | Zn     |
| 257 | BEPNOB       | 1402.09 | 10.42 | 0.55 | 0.89 | 0.49 | other        | Zn     |
| 258 | BEPNIV       | 1410.26 | 10.37 | 0.55 | 0.89 | 0.48 | other        | Zn     |
| 259 | BEPLUF       | 1427.12 | 10.60 | 0.56 | 0.88 | 0.50 | other        | Zn     |
| 260 | BIWYAH10     | 3916.42 | 7.20  | 0.70 | 0.72 | 0.94 | monoclinic   | Nd     |
| 261 | QUNMUI       | 639.65  | 6.44  | 0.39 | 1.54 | 0.19 | triclinic    | Cd     |
| 262 | IDIWOH01     | 1567.98 | 7.49  | 0.64 | 1.00 | 0.48 | orthorhombic | V      |
| 263 | VUQJUN       | 1994.88 | 11.69 | 0.71 | 0.79 | 0.65 | triclinic    | Mn     |
| 264 | RABHAZ       | 1296.45 | 6.86  | 0.47 | 1.07 | 0.33 | other        | Cd, Ni |
| 265 | XEDPON       | 1407.21 | 7.48  | 0.64 | 1.14 | 0.43 | triclinic    | Zn     |
| 266 | HAXMUP       | 1000.42 | 8.05  | 0.39 | 1.09 | 0.28 | triclinic    | Cu     |
| 267 | VUQJUN01     | 1991.96 | 11.71 | 0.71 | 0.79 | 0.65 | triclinic    | Mn     |
| 268 | XUGSEY       | 3379.22 | 7.34  | 0.75 | 0.71 | 0.85 | triclinic    | Zn     |
| 269 | MOF-1-Dybtsc | 2196.45 | 9.39  | 0.69 | 0.83 | 0.70 | tetragonal   | Zn     |

|     |              |         |       |      |      |      |              |        |
|-----|--------------|---------|-------|------|------|------|--------------|--------|
| 270 | UBUMAH       | 2909.56 | 6.85  | 0.73 | 0.85 | 0.70 | orthorhombic | Zn     |
| 271 | HIFTOG02     | 1175.59 | 7.85  | 0.57 | 1.16 | 0.29 | triclinic    | Zn     |
| 272 | VEHRIL       | 1688.36 | 8.89  | 0.64 | 1.10 | 0.47 | triclinic    | Sm     |
| 273 | MOF-1-Dybtse | 2196.45 | 9.39  | 0.69 | 0.83 | 0.70 | tetragonal   | Zn     |
| 274 | MATVEJ       | 2986.26 | 8.87  | 0.73 | 0.72 | 0.79 | triclinic    | Zn     |
| 275 | CAXVOO       | 1343.96 | 11.64 | 0.70 | 1.12 | 0.51 | triclinic    | Fe     |
| 276 | DEZKAW       | 1540.20 | 8.85  | 0.58 | 0.91 | 0.43 | triclinic    | Mn     |
| 277 | SAQQOR_clea  | 2070.82 | 11.45 | 0.71 | 0.78 | 0.71 | triclinic    | Y      |
| 278 | ANUGUM       | 3513.94 | 8.63  | 0.81 | 0.68 | 0.98 | triclinic    | Zn     |
| 279 | RIBDAJ       | 2342.09 | 5.82  | 0.66 | 0.93 | 0.59 | other        | Ni     |
| 280 | GEDDAW       | 2009.28 | 10.20 | 0.68 | 1.00 | 0.60 | triclinic    | Co     |
| 281 | AQUDAS       | 1617.02 | 8.88  | 0.62 | 1.04 | 0.47 | other        | Cu     |
| 282 | CENKAJ       | 755.78  | 8.22  | 0.43 | 1.28 | 0.20 | triclinic    | Cu     |
| 283 | PETWOC       | 892.66  | 9.16  | 0.59 | 1.69 | 0.27 | triclinic    | U      |
| 284 | MAGBAZ       | 1889.67 | 7.69  | 0.63 | 0.96 | 0.53 | orthorhombic | Zn     |
| 285 | OMORUE       | 2115.78 | 6.19  | 0.68 | 0.92 | 0.53 | tetragonal   | Cu     |
| 286 | SADMUH       | 1706.12 | 7.74  | 0.64 | 0.98 | 0.52 | triclinic    | Fe     |
| 287 | CEKHIL       | 4265.56 | 9.32  | 0.82 | 0.61 | 1.16 | monoclinic   | Co     |
| 288 | MOXDIN01     | 2038.29 | 6.65  | 0.61 | 0.94 | 0.52 | triclinic    | Co     |
| 289 | AMILUE       | 1161.04 | 11.37 | 0.56 | 0.98 | 0.42 | triclinic    | Zn     |
| 290 | MOCKEV       | 2869.07 | 10.89 | 0.79 | 0.77 | 0.87 | triclinic    | Cu     |
| 291 | RIFDUG01     | 2181.57 | 13.02 | 0.77 | 0.87 | 0.72 | triclinic    | Zn     |
| 292 | YEGKOM       | 1211.81 | 5.65  | 0.55 | 1.13 | 0.39 | tetragonal   | Zn     |
| 293 | SOVHAM       | 976.90  | 5.14  | 0.41 | 1.17 | 0.29 | monoclinic   | Cd, Ni |
| 294 | HIBGIJ       | 305.41  | 4.78  | 0.26 | 1.66 | 0.12 | other        | Mn     |
| 295 | CAXWAB       | 1276.81 | 11.50 | 0.70 | 1.15 | 0.50 | triclinic    | Fe     |
| 296 | IJOMOJ06     | 391.12  | 5.01  | 0.28 | 1.62 | 0.15 | other        | Mn     |
| 297 | MgMOF-74     | 1681.25 | 11.86 | 0.73 | 0.88 | 0.68 | triclinic    | Mg     |
| 298 | HUZSUR01     | 1610.42 | 9.99  | 0.62 | 0.84 | 0.47 | triclinic    | K, Zn  |
| 299 | VEDFOB       | 1235.54 | 6.04  | 0.54 | 1.05 | 0.32 | orthorhombic | Co     |
| 300 | FAKLIO       | 2093.52 | 9.33  | 0.64 | 0.75 | 0.69 | other        | Mn     |
| 301 | JAVNIE       | 2085.88 | 7.06  | 0.65 | 0.94 | 0.51 | orthorhombic | Cu     |
| 302 | CAXVUU       | 1329.90 | 11.30 | 0.70 | 1.15 | 0.49 | triclinic    | Fe     |
| 303 | GACPUX       | 1126.81 | 5.85  | 0.56 | 1.02 | 0.33 | orthorhombic | Zn     |
| 304 | BAKGIF       | 1330.63 | 8.31  | 0.54 | 1.02 | 0.40 | monoclinic   | Ni     |
| 305 | BOLPEY       | 2176.87 | 7.26  | 0.64 | 0.89 | 0.54 | triclinic    | Si, Zn |
| 306 | IXAJUN       | 1510.81 | 5.81  | 0.65 | 1.00 | 0.43 | monoclinic   | Cu     |
| 307 | CUCSAU       | 1184.82 | 5.63  | 0.35 | 0.84 | 0.30 | triclinic    | Li     |
| 308 | IJOMOJ07     | 387.88  | 5.04  | 0.28 | 1.62 | 0.14 | other        | Mn     |
| 309 | NALWOO       | 1286.86 | 9.20  | 0.56 | 1.03 | 0.41 | orthorhombic | Ba     |
| 310 | UVEVAT       | 1393.54 | 4.92  | 0.60 | 0.99 | 0.35 | orthorhombic | Mn     |
| 311 | NEDWEA       | 2256.26 | 7.53  | 0.65 | 0.86 | 0.59 | triclinic    | Co, Mn |
| 312 | MINVUA01     | 1484.64 | 6.51  | 0.60 | 1.04 | 0.45 | triclinic    | Cr     |
| 313 | LASYOU       | 2267.07 | 10.03 | 0.77 | 0.93 | 0.65 | triclinic    | Cu     |
| 314 | QUQPOI       | 2599.14 | 6.08  | 0.66 | 0.77 | 0.68 | other        | Zn     |

|     |          |         |       |      |      |      |              |        |
|-----|----------|---------|-------|------|------|------|--------------|--------|
| 315 | VEMMEG   | 2422.50 | 6.87  | 0.67 | 0.82 | 0.65 | triclinic    | Mn     |
| 316 | ICEGED   | 2189.72 | 7.13  | 0.69 | 0.94 | 0.60 | triclinic    | Cd     |
| 317 | CAXWIJ   | 1270.71 | 11.56 | 0.70 | 1.14 | 0.50 | triclinic    | Fe     |
| 318 | RAXCOK   | 3181.68 | 7.28  | 0.72 | 0.76 | 0.76 | other        | Zn     |
| 319 | FIFPAM01 | 915.10  | 4.30  | 0.47 | 1.03 | 0.30 | triclinic    | Ni     |
| 320 | NALYEG   | 835.55  | 13.09 | 0.67 | 1.57 | 0.36 | other        | U      |
| 321 | IXOFIL   | 1485.40 | 6.87  | 0.63 | 1.02 | 0.46 | orthorhombic | V      |
| 322 | LUNBEB   | 968.10  | 5.77  | 0.59 | 1.98 | 0.24 | other        | Co, W  |
| 323 | ICALOP   | 2915.76 | 7.82  | 0.82 | 0.80 | 0.79 | orthorhombic | In     |
| 324 | BAZJIX   | 2419.54 | 8.71  | 0.71 | 0.77 | 0.69 | triclinic    | Mn     |
| 325 | DUCGEO   | 956.77  | 6.94  | 0.38 | 0.98 | 0.26 | monoclinic   | Cu     |
| 326 | Co-DOBDC | 1201.25 | 11.61 | 0.72 | 1.18 | 0.49 | triclinic    | Co     |
| 327 | UVINAP   | 209.71  | 4.33  | 0.19 | 1.24 | 0.09 | other        | Co     |
| 328 | GERPUP   | 660.74  | 8.52  | 0.38 | 1.48 | 0.20 | other        | Cu, Sm |
| 329 | FEFDAX   | 2345.83 | 7.82  | 0.68 | 0.83 | 0.64 | triclinic    | Zn     |
| 330 | FUSWIA   | 1733.78 | 6.59  | 0.63 | 0.98 | 0.44 | orthorhombic | Cu     |
| 331 | RAVVOA   | 234.05  | 4.72  | 0.25 | 1.85 | 0.11 | other        | Co     |
| 332 | IJOMOJ02 | 378.30  | 5.03  | 0.28 | 1.62 | 0.15 | other        | Mn     |
| 333 | HIFWAV   | 1009.46 | 7.08  | 0.43 | 1.14 | 0.26 | other        | Zn     |
| 334 | SERJOP   | 883.45  | 8.81  | 0.53 | 1.47 | 0.26 | orthorhombic | Er     |
| 335 | ZAZBUZ   | 1133.69 | 6.74  | 0.54 | 1.17 | 0.36 | triclinic    | Cu     |
| 336 | NIJZIP01 | 658.91  | 8.51  | 0.38 | 1.46 | 0.20 | other        | Cu, Nd |
| 337 | EXOTUH   | 1670.47 | 5.67  | 0.59 | 0.95 | 0.44 | other        | Cd     |
| 338 | ATIBUA   | 325.20  | 4.79  | 0.26 | 1.68 | 0.13 | other        | Mn     |
| 339 | BEPMAM   | 1377.16 | 10.43 | 0.56 | 0.89 | 0.47 | other        | Zn     |
| 340 | CAWDOU02 | 1627.24 | 6.98  | 0.57 | 0.91 | 0.40 | other        | Cu     |
| 341 | IXOFUX01 | 1599.21 | 6.63  | 0.63 | 1.00 | 0.47 | orthorhombic | V      |
| 342 | DABWUA   | 1458.15 | 6.57  | 0.61 | 0.93 | 0.41 | other        | Cu     |
| 343 | BEPP0D   | 1188.83 | 10.33 | 0.50 | 0.96 | 0.38 | other        | Zn     |
| 344 | BUKMUQ   | 3158.77 | 5.50  | 0.71 | 0.85 | 0.71 | orthorhombic | Zn     |
| 345 | FAKMAH   | 2085.76 | 8.52  | 0.63 | 0.76 | 0.66 | other        | Mn     |
| 346 | NEJSAY   | 235.72  | 4.28  | 0.43 | 1.24 | 0.06 | triclinic    | Cu     |
| 347 | AVEROJ   | 805.68  | 6.76  | 0.54 | 1.70 | 0.26 | other        | Cd     |
| 348 | BANMAG   | 727.10  | 8.68  | 0.39 | 1.37 | 0.22 | other        | Co, Nd |
| 349 | DAXHIV   | 2167.97 | 7.50  | 0.67 | 0.88 | 0.61 | triclinic    | Fe     |
| 350 | RATCUL03 | 308.61  | 4.85  | 0.27 | 1.73 | 0.13 | other        | Fe     |
| 351 | ATIBOU   | 361.80  | 4.97  | 0.27 | 1.66 | 0.14 | other        | Mn     |
| 352 | XOHFIK   | 374.31  | 4.99  | 0.27 | 1.62 | 0.14 | other        | Mn     |
| 353 | FEXCES   | 1244.54 | 6.01  | 0.61 | 1.02 | 0.36 | other        | Co     |
| 354 | VEDGAO   | 1088.52 | 5.66  | 0.51 | 1.07 | 0.29 | orthorhombic | Co     |
| 355 | HOGTOM   | 433.91  | 7.88  | 0.30 | 1.77 | 0.15 | other        | Cu, Pr |
| 356 | RATCUL02 | 285.33  | 4.80  | 0.26 | 1.74 | 0.12 | other        | Fe     |
| 357 | YARGAB   | 1351.64 | 10.67 | 0.62 | 0.96 | 0.49 | other        | Zn     |
| 358 | TATPOV   | 1986.66 | 8.55  | 0.71 | 0.93 | 0.54 | orthorhombic | Zn     |
| 359 | NEHZIK   | 912.98  | 7.48  | 0.39 | 1.20 | 0.25 | triclinic    | Zn     |



|     |          |         |       |      |      |      |              |        |
|-----|----------|---------|-------|------|------|------|--------------|--------|
| 360 | AFIXAO   | 946.79  | 6.45  | 0.40 | 1.12 | 0.26 | other        | Co     |
| 361 | DOYLIM   | 822.30  | 4.68  | 0.36 | 1.19 | 0.27 | other        | Cd, Ni |
| 362 | KIGCEK   | 1226.01 | 10.57 | 0.52 | 0.99 | 0.41 | other        | Zn     |
| 363 | LAVTEJ01 | 811.04  | 6.73  | 0.60 | 1.65 | 0.27 | tetragonal   | Dy     |
| 364 | BEPPIX   | 1125.49 | 10.02 | 0.49 | 0.99 | 0.37 | other        | Zn     |
| 365 | WUHJIT   | 2691.66 | 10.93 | 0.71 | 0.74 | 0.78 | triclinic    | Mg     |
| 366 | XEGKUR   | 1722.29 | 6.53  | 0.60 | 1.03 | 0.43 | triclinic    | Gd     |
| 367 | JIXWUJ   | 379.60  | 5.08  | 0.27 | 1.63 | 0.14 | other        | Mn     |
| 368 | XEGJOK   | 1626.08 | 7.67  | 0.60 | 1.07 | 0.40 | triclinic    | Gd     |
| 369 | NIKZAJ02 | 257.06  | 4.71  | 0.25 | 1.77 | 0.11 | other        | Fe     |
| 370 | MINVUA01 | 1470.94 | 6.51  | 0.60 | 1.04 | 0.45 | triclinic    | Cr     |
| 371 | EHALOP   | 1513.99 | 7.39  | 0.72 | 0.94 | 0.51 | triclinic    | Al     |
| 372 | XACZEH   | 743.54  | 10.47 | 0.42 | 1.19 | 0.24 | triclinic    | Cu     |
| 373 | HAFQOW   | 1534.56 | 7.21  | 0.73 | 0.95 | 0.50 | other        | Al     |
| 374 | LAGVOG   | 2236.78 | 7.31  | 0.70 | 0.94 | 0.61 | other        | Y      |
| 375 | ECAHAT   | 1189.29 | 12.44 | 0.53 | 0.85 | 0.44 | other        | Zn     |
| 376 | GACQAE   | 2128.90 | 8.82  | 0.69 | 0.87 | 0.65 | orthorhombic | Zn     |
| 377 | IXODUV   | 1596.63 | 6.73  | 0.64 | 1.01 | 0.47 | orthorhombic | V      |
| 378 | GETXEK   | 2778.12 | 7.71  | 0.68 | 0.71 | 0.78 | triclinic    | Cd     |
| 379 | WAJJAU   | 1024.20 | 7.49  | 0.55 | 1.23 | 0.33 | other        | Li, Zn |
| 380 | ATIBAG   | 365.45  | 4.97  | 0.27 | 1.65 | 0.14 | other        | Mn     |
| 381 | XILVIZ   | 2210.13 | 7.84  | 0.66 | 0.85 | 0.57 | triclinic    | Mn, Zn |
| 382 | DAXHIV01 | 2144.64 | 7.56  | 0.67 | 0.88 | 0.61 | triclinic    | Fe     |
| 383 | FEYJOJ   | 2403.98 | 5.93  | 0.73 | 0.91 | 0.56 | other        | Co     |
| 384 | SADMOB   | 1148.98 | 6.04  | 0.52 | 1.12 | 0.35 | triclinic    | Fe     |
| 385 | BAKJII   | 1724.25 | 6.02  | 0.66 | 0.96 | 0.49 | monoclinic   | Co     |
| 386 | NIKYOW02 | 262.37  | 4.76  | 0.25 | 1.75 | 0.12 | other        | Fe     |
| 387 | XASFAY   | 692.20  | 4.96  | 0.36 | 0.99 | 0.19 | triclinic    | Cu     |
| 388 | WIHVEP   | 423.29  | 4.75  | 0.29 | 1.61 | 0.16 | other        | Mn     |
| 389 | KASRAZ   | 1986.27 | 5.89  | 0.66 | 0.99 | 0.46 | monoclinic   | Cd     |
| 390 | WAJHOG   | 556.04  | 5.35  | 0.36 | 1.32 | 0.17 | other        | Li, Zn |
| 391 | DUFGOB   | 1095.68 | 8.17  | 0.46 | 1.12 | 0.32 | other        | K, U   |
| 392 | GINLIA   | 1971.33 | 6.05  | 0.64 | 0.88 | 0.51 | monoclinic   | Zn     |
| 393 | WEVQOD   | 618.72  | 8.33  | 0.36 | 1.51 | 0.19 | other        | Cu, Gd |
| 394 | VACFOV   | 2186.39 | 7.04  | 0.70 | 0.93 | 0.56 | other        | In     |
| 395 | PEFRUP   | 1455.91 | 9.39  | 0.67 | 1.05 | 0.47 | other        | Gd     |
| 396 | DAXHUH01 | 2149.74 | 7.46  | 0.68 | 0.89 | 0.60 | triclinic    | Fe     |
| 397 | FAHFUR   | 704.95  | 6.09  | 0.54 | 0.94 | 0.20 | other        | Be     |
| 398 | XAJQAC   | 1996.26 | 8.74  | 0.73 | 0.89 | 0.55 | other        | In     |
| 399 | JIXWUJ01 | 353.72  | 5.01  | 0.27 | 1.64 | 0.13 | other        | Mn     |
| 400 | PEWXUL   | 596.03  | 4.88  | 0.41 | 1.06 | 0.16 | triclinic    | Ni     |
| 401 | VOCXUH   | 2849.84 | 7.52  | 0.73 | 0.77 | 0.75 | other        | Co     |
| 402 | ETEKEU   | 1737.13 | 6.61  | 0.68 | 1.16 | 0.45 | triclinic    | Er     |
| 403 | XENKIM   | 2454.89 | 7.23  | 0.69 | 0.82 | 0.65 | triclinic    | Ca     |
| 404 | ODIMAQ   | 641.60  | 8.52  | 0.38 | 1.44 | 0.21 | other        | Sm, Zn |

|     |          |         |       |      |      |      |              |        |
|-----|----------|---------|-------|------|------|------|--------------|--------|
| 405 | FEHCOM   | 1492.37 | 7.63  | 0.56 | 0.95 | 0.42 | triclinic    | Zn     |
| 406 | FIJCUX01 | 1168.52 | 6.93  | 0.56 | 1.22 | 0.34 | other        | Zn     |
| 407 | EBEWOZ   | 818.40  | 6.78  | 0.60 | 1.63 | 0.27 | tetragonal   | Gd     |
| 408 | UTEXAT   | 1125.08 | 6.76  | 0.57 | 1.02 | 0.31 | tetragonal   | Zn     |
| 409 | FUNCAT   | 1453.63 | 9.49  | 0.59 | 0.93 | 0.46 | orthorhombic | Zn     |
| 410 | ATICEL   | 405.94  | 4.94  | 0.28 | 1.61 | 0.15 | other        | Mn     |
| 411 | EBELUU   | 1066.72 | 4.98  | 0.50 | 1.09 | 0.35 | monoclinic   | Ni, Zn |
| 412 | LAGNOY   | 1049.17 | 7.03  | 0.57 | 1.21 | 0.32 | triclinic    | Y      |
| 413 | ODODIW   | 1799.34 | 7.68  | 0.64 | 0.97 | 0.51 | triclinic    | Si, Zn |
| 414 | BUSQEM   | 502.49  | 5.73  | 0.51 | 0.95 | 0.13 | orthorhombic | Mn     |
| 415 | PEFRID   | 1514.87 | 9.72  | 0.68 | 1.02 | 0.50 | other        | Sm     |
| 416 | AVUDAX   | 1186.27 | 5.89  | 0.47 | 1.00 | 0.27 | other        | Cu     |
| 417 | EXEQII   | 1391.61 | 7.21  | 0.63 | 1.02 | 0.45 | triclinic    | Sc     |
| 418 | MEGBAD   | 2441.45 | 9.62  | 0.68 | 0.85 | 0.62 | triclinic    | Mn, Ni |
| 419 | XINFUW   | 3091.23 | 6.30  | 0.72 | 0.84 | 0.70 | orthorhombic | Zn     |
| 420 | WAYMEQ   | 1452.05 | 6.75  | 0.69 | 0.98 | 0.46 | triclinic    | Al     |
| 421 | MIZJUB   | 2133.85 | 6.07  | 0.62 | 0.87 | 0.53 | monoclinic   | Zn     |
| 422 | FEVSAC   | 162.01  | 4.49  | 0.22 | 1.30 | 0.06 | other        | Rb     |
| 423 | WAMRIN01 | 1473.43 | 6.97  | 0.62 | 0.94 | 0.44 | orthorhombic | Mg     |
| 424 | LUCDIW   | 2665.32 | 7.89  | 0.74 | 0.82 | 0.77 | triclinic    | Ce     |
| 425 | VEDFAN   | 1311.46 | 6.20  | 0.55 | 1.04 | 0.36 | orthorhombic | Co     |
| 426 | ZESFUY   | 1882.06 | 9.94  | 0.69 | 0.87 | 0.62 | other        | Si, Zn |
| 427 | NEJYUY   | 1835.28 | 6.67  | 0.61 | 1.04 | 0.43 | other        | Cd     |
| 428 | FAGFUQ   | 2249.42 | 7.06  | 0.64 | 0.84 | 0.58 | triclinic    | Co     |
| 429 | LEDLEN   | 2033.36 | 8.15  | 0.62 | 0.91 | 0.55 | triclinic    | Cu     |
| 430 | NAZZEV   | 1542.42 | 9.54  | 0.68 | 1.02 | 0.50 | other        | Sm     |
| 431 | LAGCED   | 1262.24 | 8.24  | 0.52 | 1.14 | 0.35 | other        | Ag, Zn |
| 432 | OWAVOY   | 1696.54 | 7.81  | 0.64 | 1.01 | 0.44 | other        | Zn     |
| 433 | FAKLOU   | 1730.30 | 9.11  | 0.63 | 0.88 | 0.58 | other        | Cd     |
| 434 | BEPMEQ   | 1050.32 | 10.66 | 0.46 | 1.01 | 0.37 | other        | Zn     |
| 435 | UBUROY   | 2163.08 | 6.59  | 0.57 | 1.08 | 0.59 | triclinic    | Cu, Zn |
| 436 | UTEXIB   | 1139.65 | 6.79  | 0.56 | 1.00 | 0.32 | tetragonal   | Co     |
| 437 | IXOFOR   | 1544.23 | 6.30  | 0.62 | 1.02 | 0.45 | orthorhombic | V      |
| 438 | VUQKAU02 | 951.16  | 4.63  | 0.53 | 1.03 | 0.25 | other        | Mn     |
| 439 | WOHDON   | 1435.14 | 5.54  | 0.66 | 1.43 | 0.37 | orthorhombic | Cd     |
| 440 | HOWQAM   | 1996.57 | 7.02  | 0.70 | 1.01 | 0.49 | orthorhombic | Cd     |
| 441 | GAXDIS10 | 1155.42 | 5.62  | 0.49 | 1.32 | 0.36 | orthorhombic | Cd     |
| 442 | CUYYAX   | 788.40  | 5.12  | 0.53 | 1.16 | 0.22 | tetragonal   | Cd     |
| 443 | QUQFIS   | 2653.88 | 7.64  | 0.77 | 0.86 | 0.67 | triclinic    | Zn     |
| 444 | XANMIJ   | 1196.12 | 6.89  | 0.53 | 1.16 | 0.31 | triclinic    | Co     |
| 445 | NABMUA   | 1160.15 | 6.09  | 0.59 | 1.12 | 0.36 | other        | Mg     |
| 446 | ZURQOS   | 650.68  | 4.18  | 0.42 | 1.31 | 0.25 | triclinic    | Cd, Ni |
| 447 | LUFQUZ02 | 494.34  | 4.33  | 0.37 | 1.30 | 0.23 | orthorhombic | Fe, Ni |
| 448 | MUVGUG   | 571.77  | 5.75  | 0.51 | 0.98 | 0.14 | orthorhombic | Zn     |
| 449 | YAXBOP   | 1071.83 | 5.94  | 0.52 | 1.13 | 0.35 | triclinic    | Fe     |

|     |          |         |       |      |      |      |              |        |
|-----|----------|---------|-------|------|------|------|--------------|--------|
| 450 | XADDUD   | 1553.19 | 6.65  | 0.58 | 1.13 | 0.37 | triclinic    | Co     |
| 451 | DAXHUH   | 2217.37 | 7.37  | 0.67 | 0.88 | 0.61 | triclinic    | Fe     |
| 452 | SARNOQ   | 1466.44 | 9.28  | 0.55 | 1.11 | 0.44 | triclinic    | Zn     |
| 453 | MURCIL   | 599.71  | 8.30  | 0.36 | 1.54 | 0.19 | other        | Cu, Dy |
| 454 | BEPMIU   | 1036.24 | 10.48 | 0.44 | 1.02 | 0.36 | other        | Zn     |
| 455 | DEYVUA   | 1978.01 | 5.24  | 0.70 | 0.96 | 0.46 | tetragonal   | Zn     |
| 456 | INOVEN   | 1929.46 | 6.52  | 0.66 | 1.11 | 0.47 | triclinic    | Gd     |
| 457 | QONQEQ   | 1579.91 | 7.11  | 0.70 | 0.94 | 0.50 | other        | Al     |
| 458 | NIHBEM01 | 282.50  | 4.75  | 0.26 | 1.74 | 0.13 | other        | Fe     |
| 459 | REGQUR   | 2157.26 | 6.07  | 0.69 | 1.03 | 0.53 | other        | Zn     |
| 460 | KALGAH   | 1531.58 | 5.95  | 0.61 | 0.94 | 0.41 | triclinic    | Ni     |
| 461 | VIRVEY   | 2245.19 | 7.10  | 0.72 | 1.09 | 0.56 | orthorhombic | Pt, Zn |
| 462 | LAGCUT   | 1231.72 | 8.25  | 0.53 | 1.15 | 0.35 | other        | Ag, Zn |
| 463 | ICAGOK   | 2122.22 | 9.13  | 0.65 | 0.84 | 0.57 | monoclinic   | Cu     |
| 464 | ISOHEE   | 1976.83 | 8.35  | 0.65 | 0.85 | 0.61 | monoclinic   | Zn     |
| 465 | HIHGOW   | 1923.08 | 7.95  | 0.62 | 0.92 | 0.42 | triclinic    | Zn     |
| 466 | AFOTUL   | 1411.51 | 8.77  | 0.63 | 1.06 | 0.45 | triclinic    | Sm     |
| 467 | Zn-DOBDC | 1196.76 | 11.70 | 0.73 | 1.22 | 0.49 | triclinic    | Zn     |
| 468 | ZIKJOU   | 1585.97 | 5.32  | 0.63 | 0.97 | 0.45 | triclinic    | Cu     |
| 469 | WAYMOA   | 1522.90 | 6.89  | 0.68 | 0.95 | 0.48 | triclinic    | Al     |
| 470 | DEQFOU   | 225.86  | 4.47  | 0.36 | 1.34 | 0.09 | triclinic    | Cu     |
| 471 | KIYMIQ   | 1013.42 | 7.27  | 0.49 | 1.04 | 0.28 | other        | Na     |
| 472 | UZUNAF01 | 735.35  | 7.28  | 0.37 | 1.27 | 0.23 | triclinic    | Cu     |
| 473 | SABVUN   | 1464.45 | 6.80  | 0.69 | 0.98 | 0.45 | triclinic    | Al     |
| 474 | BIFKEI   | 1443.59 | 5.79  | 0.57 | 1.02 | 0.38 | triclinic    | Cu     |
| 475 | QOCSAD   | 830.15  | 5.84  | 0.51 | 1.40 | 0.27 | triclinic    | Ce     |
| 476 | IBOZIK   | 1751.80 | 6.03  | 0.60 | 0.94 | 0.47 | monoclinic   | Cu     |
| 477 | WEMBUN   | 1099.23 | 4.84  | 0.53 | 1.71 | 0.29 | monoclinic   | Er     |
| 478 | CUHPUR   | 2268.71 | 7.79  | 0.69 | 0.89 | 0.61 | orthorhombic | Cd     |
| 479 | HURGEH   | 1828.09 | 7.79  | 0.62 | 1.02 | 0.46 | other        | Co     |
| 480 | WUWQEL   | 675.42  | 6.58  | 0.42 | 1.72 | 0.20 | triclinic    | Cd     |
| 481 | RURPEA   | 343.62  | 4.26  | 0.38 | 1.80 | 0.17 | other        | Fe, Pt |
| 482 | VEDFIV   | 1129.55 | 5.77  | 0.51 | 1.07 | 0.29 | orthorhombic | Co     |
| 483 | DARDAD   | 1543.07 | 7.21  | 0.71 | 0.94 | 0.51 | triclinic    | Al     |
| 484 | GIFKAH   | 779.67  | 4.32  | 0.38 | 1.23 | 0.28 | triclinic    | Cd, Ni |
| 485 | SUTBIT   | 1822.60 | 8.24  | 0.71 | 0.86 | 0.58 | orthorhombic | Ni     |
| 486 | WAYMIU   | 1510.95 | 7.79  | 0.71 | 0.98 | 0.48 | triclinic    | Al     |
| 487 | VEDFER   | 1198.58 | 5.64  | 0.53 | 1.06 | 0.31 | orthorhombic | Co     |
| 488 | CIJVOH   | 1314.88 | 5.46  | 0.64 | 1.44 | 0.33 | orthorhombic | Cd     |
| 489 | Cd3BTB2  | 2042.56 | 6.83  | 0.65 | 0.97 | 0.50 | triclinic    | Cd     |
| 490 | AWAGEL   | 1102.76 | 8.74  | 0.51 | 0.99 | 0.35 | other        | Cd     |
| 491 | BEPNUH   | 918.70  | 10.82 | 0.47 | 1.17 | 0.31 | other        | Zn     |
| 492 | CEHKUW   | 1524.03 | 6.97  | 0.67 | 1.26 | 0.39 | tetragonal   | Cd     |
| 493 | FAPVAV   | 1704.39 | 6.72  | 0.63 | 0.96 | 0.44 | orthorhombic | Co     |
| 494 | DAWWEF   | 1810.29 | 6.74  | 0.62 | 1.08 | 0.48 | tetragonal   | Co     |

|     |          |         |      |      |      |      |              |        |
|-----|----------|---------|------|------|------|------|--------------|--------|
| 495 | ANOMUM   | 2784.87 | 6.90 | 0.72 | 0.83 | 0.70 | triclinic    | Cu     |
| 496 | FIVYEP01 | 506.84  | 5.70 | 0.36 | 2.03 | 0.15 | triclinic    | K, U   |
| 497 | WIHVAL   | 434.98  | 5.07 | 0.29 | 1.61 | 0.16 | other        | Mn     |
| 498 | VAKBIU   | 577.98  | 5.77 | 0.45 | 1.03 | 0.13 | triclinic    | Mn     |
| 499 | EBIHII   | 1493.59 | 6.33 | 0.60 | 1.13 | 0.39 | triclinic    | Fe     |
| 500 | FAPTUN   | 1607.14 | 6.56 | 0.63 | 0.98 | 0.42 | orthorhombic | Cu     |
| 501 | MOYYEF   | 1862.32 | 7.43 | 0.61 | 0.95 | 0.52 | triclinic    | Cu     |
| 502 | FUTKEL   | 1443.77 | 6.45 | 0.51 | 0.98 | 0.37 | triclinic    | Zn     |
| 503 | RELLAW   | 1986.98 | 7.58 | 0.64 | 0.90 | 0.48 | other        | Zn     |
| 504 | KEWZOD   | 2223.84 | 8.56 | 0.67 | 0.84 | 0.61 | orthorhombic | Zn     |
| 505 | MUVHAN   | 441.59  | 5.67 | 0.51 | 0.98 | 0.13 | orthorhombic | Zn     |
| 506 | SADLOA   | 878.96  | 6.87 | 0.61 | 1.54 | 0.29 | tetragonal   | Nd     |
| 507 | XUNJEW   | 788.25  | 7.70 | 0.50 | 1.35 | 0.24 | other        | Zn     |
| 508 | CANRIU   | 1788.99 | 6.78 | 0.58 | 0.86 | 0.46 | triclinic    | Mg, Si |
| 509 | FUTCAZ   | 2974.29 | 6.67 | 0.71 | 0.82 | 0.74 | orthorhombic | Mn     |
| 510 | AFOYOK   | 1393.54 | 8.04 | 0.56 | 0.98 | 0.38 | other        | Cu     |
| 511 | LAVTIN   | 837.59  | 6.61 | 0.60 | 1.63 | 0.27 | tetragonal   | Er     |
| 512 | ROGSAI   | 1329.95 | 6.74 | 0.57 | 1.17 | 0.38 | other        | Ni     |
| 513 | EBEWOZ01 | 818.53  | 6.79 | 0.60 | 1.63 | 0.27 | tetragonal   | Gd     |
| 514 | LAVTOT   | 851.04  | 6.62 | 0.60 | 1.63 | 0.28 | tetragonal   | Er     |
| 515 | CAWVIH   | 564.81  | 6.57 | 0.36 | 1.24 | 0.16 | orthorhombic | Zn     |
| 516 | JAVWUY   | 951.77  | 5.55 | 0.48 | 1.11 | 0.30 | orthorhombic | Ag     |
| 517 | UGUQOC   | 845.85  | 5.53 | 0.42 | 1.19 | 0.26 | triclinic    | Zn     |
| 518 | SONTAR   | 2044.58 | 6.75 | 0.65 | 1.00 | 0.55 | triclinic    | Pr     |
| 519 | EGELUY   | 1528.94 | 7.09 | 0.71 | 0.95 | 0.49 | orthorhombic | Al     |
| 520 | NOCLUN   | 1317.30 | 6.13 | 0.59 | 1.07 | 0.38 | orthorhombic | Sr     |
| 521 | IQEWOQ   | 461.88  | 5.05 | 0.30 | 1.59 | 0.17 | other        | Mn     |
| 522 | WICGEV   | 424.25  | 5.09 | 0.29 | 1.61 | 0.15 | other        | Mn     |
| 523 | MATVAF   | 2011.51 | 7.44 | 0.63 | 0.88 | 0.53 | other        | Zn     |
| 524 | VACFOV01 | 1921.99 | 6.97 | 0.72 | 0.97 | 0.51 | other        | In     |
| 525 | CUYWUP   | 1724.98 | 7.07 | 0.63 | 0.94 | 0.42 | orthorhombic | Cu     |
| 526 | NEJSOM   | 1082.22 | 5.59 | 0.51 | 1.12 | 0.30 | triclinic    | Cu     |
| 527 | XEXLAP   | 1194.20 | 8.90 | 0.54 | 1.07 | 0.39 | other        | Mn     |
| 528 | JEJWIF   | 2225.99 | 7.58 | 0.64 | 0.85 | 0.56 | triclinic    | Co     |
| 529 | AFITIT   | 1129.06 | 7.40 | 0.47 | 1.02 | 0.30 | triclinic    | Zn     |
| 530 | VATYAR   | 1156.76 | 5.84 | 0.54 | 1.48 | 0.34 | triclinic    | Nd     |
| 531 | NEJRUR   | 533.79  | 4.34 | 0.42 | 1.24 | 0.15 | triclinic    | Cu     |
| 532 | CUYYEB   | 786.63  | 5.16 | 0.53 | 1.16 | 0.23 | tetragonal   | Cd     |
| 533 | VAHVOR   | 1785.06 | 6.07 | 0.66 | 1.15 | 0.44 | triclinic    | Dy     |
| 534 | FIJCUX   | 1092.51 | 6.62 | 0.55 | 1.26 | 0.31 | other        | Zn     |
| 535 | FIVYEP   | 529.76  | 5.70 | 0.36 | 2.03 | 0.15 | triclinic    | K, U   |
| 536 | CADQAB   | 1778.28 | 6.53 | 0.67 | 1.12 | 0.45 | triclinic    | Pr     |
| 537 | HAMJOW   | 1921.14 | 5.76 | 0.68 | 0.92 | 0.48 | other        | Zn     |
| 538 | GAXKUN   | 2226.30 | 7.47 | 0.66 | 0.90 | 0.55 | orthorhombic | Cd     |
| 539 | XOPLOE   | 1896.95 | 7.54 | 0.60 | 0.99 | 0.48 | triclinic    | Cu     |

|     |          |         |       |      |      |      |              |           |
|-----|----------|---------|-------|------|------|------|--------------|-----------|
| 540 | NIGGEQ   | 1842.19 | 7.21  | 0.71 | 1.25 | 0.46 | triclinic    | Tm        |
| 541 | JEWCAP   | 648.45  | 6.28  | 0.27 | 1.11 | 0.18 | other        | Cu        |
| 542 | SAMLAV   | 1015.69 | 5.41  | 0.49 | 1.19 | 0.28 | orthorhombic | Cd        |
| 543 | GERNOI   | 928.40  | 7.36  | 0.45 | 1.06 | 0.24 | orthorhombic | Zn        |
| 544 | HAWWOT   | 2193.87 | 6.70  | 0.70 | 1.02 | 0.55 | other        | Nd        |
| 545 | QUQPIC   | 2585.40 | 6.15  | 0.67 | 0.84 | 0.60 | monoclinic   | Cd        |
| 546 | WEMDOJ   | 1290.05 | 4.95  | 0.53 | 1.56 | 0.33 | monoclinic   | Sm        |
| 547 | BEXPAX   | 4155.96 | 6.18  | 0.77 | 0.75 | 0.84 | other        | Ni        |
| 548 | PAMVEG   | 71.61   | 4.26  | 0.15 | 1.31 | 0.04 | orthorhombic | Zn        |
| 549 | YUXQOY   | 2233.58 | 7.95  | 0.69 | 0.88 | 0.62 | orthorhombic | Cd        |
| 550 | LUFNAC   | 1293.97 | 7.47  | 0.59 | 1.03 | 0.40 | triclinic    | Mn        |
| 551 | XEXMEU   | 1246.60 | 9.82  | 0.56 | 1.05 | 0.40 | other        | Zn        |
| 552 | LUFNAC04 | 1308.84 | 7.64  | 0.59 | 1.03 | 0.41 | triclinic    | Mn        |
| 553 | FIJCUX   | 1127.06 | 6.62  | 0.55 | 1.26 | 0.31 | other        | Zn        |
| 554 | TAMJEY   | 1269.38 | 9.34  | 0.52 | 1.17 | 0.37 | triclinic    | Ag        |
| 555 | GENGIR   | 1273.07 | 7.31  | 0.60 | 1.15 | 0.36 | other        | Dy        |
| 556 | NIKZEN   | 294.45  | 4.86  | 0.27 | 1.74 | 0.13 | other        | Fe        |
| 557 | VIXCUB   | 1824.67 | 5.43  | 0.57 | 1.09 | 0.41 | triclinic    | Cu        |
| 558 | IFENOY01 | 340.86  | 7.24  | 0.19 | 1.33 | 0.11 | triclinic    | Zn        |
| 559 | IVEHEW   | 1938.03 | 8.06  | 0.64 | 0.86 | 0.57 | monoclinic   | Cu        |
| 560 | XIBZUF   | 2094.70 | 6.76  | 0.70 | 0.94 | 0.51 | orthorhombic | Y         |
| 561 | ISOJOQ   | 1643.01 | 5.70  | 0.58 | 0.99 | 0.36 | tetragonal   | In        |
| 562 | DIDBEZ   | 1415.82 | 9.88  | 0.60 | 0.93 | 0.43 | other        | Co        |
| 563 | AZIXUD   | 1446.78 | 5.95  | 0.60 | 1.10 | 0.38 | orthorhombic | Zn        |
| 564 | UFANEV   | 983.31  | 6.06  | 0.44 | 1.35 | 0.24 | tetragonal   | Ag        |
| 565 | LELRUR   | 1336.61 | 7.73  | 0.56 | 1.05 | 0.36 | triclinic    | La        |
| 566 | UZUNAF   | 713.03  | 7.30  | 0.37 | 1.27 | 0.23 | triclinic    | Cu        |
| 567 | UVEVEX   | 1371.89 | 5.06  | 0.61 | 0.99 | 0.41 | monoclinic   | Mn        |
| 568 | FUTDII   | 1619.42 | 10.35 | 0.62 | 0.87 | 0.55 | triclinic    | Fe        |
| 569 | VATXEU   | 512.38  | 7.39  | 0.43 | 2.25 | 0.15 | other        | U         |
| 570 | LUVTEC   | 976.93  | 11.12 | 0.49 | 1.08 | 0.33 | other        | Zn        |
| 571 | YEQRER   | 2171.29 | 5.90  | 0.65 | 1.16 | 0.52 | triclinic    | K, Pt, Yb |
| 572 | GALBUS   | 1434.99 | 9.46  | 0.61 | 0.96 | 0.44 | other        | Ni        |
| 573 | IXUREZ   | 857.46  | 5.62  | 0.48 | 1.17 | 0.21 | triclinic    | Zn        |
| 574 | WAFKAQ   | 2163.15 | 8.40  | 0.73 | 0.91 | 0.61 | triclinic    | Zn        |
| 575 | NEVVAM   | 870.36  | 7.39  | 0.51 | 1.42 | 0.28 | triclinic    | Co        |
| 576 | RIHJUO   | 754.57  | 6.33  | 0.48 | 1.46 | 0.23 | triclinic    | Co        |
| 577 | MIFKUJ   | 1869.53 | 5.70  | 0.57 | 0.92 | 0.46 | triclinic    | Zn        |
| 578 | JETZAK   | 2270.45 | 6.50  | 0.65 | 0.75 | 0.61 | other        | Mg        |
| 579 | IBICUT   | 907.41  | 10.48 | 0.43 | 1.07 | 0.33 | other        | Zn        |
| 580 | NIGFUF   | 1854.39 | 7.30  | 0.72 | 1.23 | 0.47 | triclinic    | Dy        |
| 581 | ETEKAQ01 | 1498.97 | 5.95  | 0.58 | 1.17 | 0.40 | triclinic    | Gd        |
| 582 | VUQKAU   | 1120.93 | 4.77  | 0.55 | 1.01 | 0.28 | other        | Mn        |
| 583 | HEKTAU   | 1020.61 | 4.78  | 0.54 | 1.12 | 0.26 | triclinic    | Cd        |
| 584 | ETEJIX   | 1937.10 | 6.73  | 0.67 | 1.06 | 0.51 | triclinic    | La        |

|     |          |         |       |      |      |      |              |        |
|-----|----------|---------|-------|------|------|------|--------------|--------|
| 585 | AFOVOH   | 1443.18 | 8.74  | 0.64 | 1.05 | 0.44 | triclinic    | Nd     |
| 586 | XUYXAR   | 178.35  | 4.44  | 0.25 | 1.51 | 0.05 | monoclinic   | Zn     |
| 587 | AVEMAQ   | 1681.96 | 7.91  | 0.51 | 0.91 | 0.41 | tetragonal   | Ni     |
| 588 | EMITUQ   | 1531.35 | 7.39  | 0.60 | 0.97 | 0.42 | other        | Zn     |
| 589 | VASKOR   | 765.19  | 4.30  | 0.38 | 1.16 | 0.20 | orthorhombic | Sc     |
| 590 | RAZYOI   | 1459.54 | 7.80  | 0.64 | 1.08 | 0.41 | other        | Cu     |
| 591 | AMUXAI   | 1264.40 | 9.01  | 0.48 | 1.02 | 0.38 | triclinic    | Cu     |
| 592 | XUMVEH   | 1543.58 | 5.47  | 0.60 | 1.14 | 0.43 | triclinic    | Nd     |
| 593 | WUNSEE01 | 448.12  | 4.81  | 0.38 | 1.21 | 0.10 | tetragonal   | Cd     |
| 594 | HAFVOB   | 1168.16 | 5.27  | 0.55 | 0.99 | 0.28 | orthorhombic | Ca     |
| 595 | DAWCOV   | 1541.19 | 6.54  | 0.60 | 0.98 | 0.40 | triclinic    | Mn     |
| 596 | ECODIK   | 1115.34 | 4.58  | 0.56 | 1.20 | 0.31 | other        | Cu     |
| 597 | TIGDOD   | 1515.60 | 6.38  | 0.58 | 0.94 | 0.41 | other        | Zn     |
| 598 | MUZHUL   | 1105.86 | 4.18  | 0.56 | 1.19 | 0.30 | triclinic    | Zn     |
| 599 | GEDRAK   | 1712.19 | 5.77  | 0.63 | 1.16 | 0.36 | triclinic    | Nd     |
| 600 | IBIDAA   | 801.96  | 10.49 | 0.43 | 1.21 | 0.29 | other        | Zn     |
| 601 | DARCOQ   | 1514.10 | 7.24  | 0.60 | 1.01 | 0.44 | other        | Y      |
| 602 | FIHRIZ   | 1287.11 | 6.60  | 0.58 | 1.06 | 0.38 | triclinic    | Ni     |
| 603 | PURJIW   | 1923.36 | 8.15  | 0.60 | 0.89 | 0.51 | triclinic    | Zn     |
| 604 | EDADIX   | 452.85  | 4.30  | 0.43 | 1.24 | 0.13 | triclinic    | Zn     |
| 605 | CIJVOH01 | 1407.19 | 5.62  | 0.66 | 1.43 | 0.35 | orthorhombic | Cd     |
| 606 | TASXIW   | 1684.96 | 6.93  | 0.64 | 1.11 | 0.41 | triclinic    | Zn     |
| 607 | BEPPAP   | 1046.81 | 9.35  | 0.43 | 1.03 | 0.36 | other        | Zn     |
| 608 | ATIBOU01 | 459.07  | 5.06  | 0.30 | 1.59 | 0.17 | other        | Mn     |
| 609 | ATICAH   | 450.17  | 4.90  | 0.29 | 1.60 | 0.16 | other        | Mn     |
| 610 | VEMTAJ01 | 765.47  | 4.93  | 0.49 | 1.24 | 0.18 | orthorhombic | Co     |
| 611 | PARNON   | 1890.53 | 7.82  | 0.61 | 0.97 | 0.48 | triclinic    | Cu     |
| 612 | KANDIO   | 761.20  | 6.04  | 0.48 | 1.17 | 0.20 | triclinic    | Zn     |
| 613 | KANCIN   | 529.55  | 4.81  | 0.43 | 1.19 | 0.17 | other        | Zn     |
| 614 | NATXOW   | 342.79  | 6.05  | 0.35 | 2.37 | 0.09 | orthorhombic | Ag     |
| 615 | LETRIN   | 850.65  | 6.95  | 0.54 | 1.45 | 0.27 | triclinic    | Zn     |
| 616 | KINFAQ   | 1100.77 | 7.57  | 0.62 | 1.35 | 0.33 | triclinic    | Tm     |
| 617 | YUBFOR   | 1031.34 | 8.69  | 0.50 | 1.20 | 0.34 | triclinic    | Zn     |
| 618 | DARFOT   | 1257.27 | 7.35  | 0.59 | 1.18 | 0.34 | other        | Tm     |
| 619 | NIKDAM   | 1292.86 | 7.97  | 0.52 | 0.96 | 0.41 | triclinic    | Ce     |
| 620 | GEDTAM   | 1817.46 | 6.10  | 0.65 | 1.09 | 0.44 | triclinic    | Nd     |
| 621 | IJASOC   | 1632.14 | 6.15  | 0.61 | 1.02 | 0.48 | triclinic    | Tm     |
| 622 | HAWWIN   | 2168.47 | 7.00  | 0.69 | 1.04 | 0.53 | other        | Nd     |
| 623 | DEYDOA   | 719.54  | 4.47  | 0.36 | 1.27 | 0.22 | monoclinic   | Cd, Ni |
| 624 | VIRPOC   | 1113.26 | 7.88  | 0.57 | 1.31 | 0.35 | triclinic    | Ni     |
| 625 | XAPTUE   | 792.63  | 6.88  | 0.54 | 1.47 | 0.25 | triclinic    | Gd     |
| 626 | NABMUA01 | 1161.12 | 6.10  | 0.60 | 1.12 | 0.35 | other        | Mg     |
| 627 | UWUTIQ   | 1495.83 | 6.30  | 0.60 | 1.01 | 0.35 | monoclinic   | Zn     |
| 628 | DARDEH   | 1394.38 | 7.53  | 0.61 | 1.10 | 0.40 | other        | Sm     |
| 629 | UZUNEJ   | 720.26  | 7.30  | 0.37 | 1.26 | 0.24 | triclinic    | Cu     |

|     |          |         |       |      |      |      |              |        |
|-----|----------|---------|-------|------|------|------|--------------|--------|
| 630 | WUNSEE   | 450.21  | 4.74  | 0.38 | 1.21 | 0.10 | tetragonal   | Cd     |
| 631 | OKIWUB01 | 480.81  | 4.73  | 0.37 | 1.20 | 0.12 | tetragonal   | Cd     |
| 632 | WEMFOL   | 1126.88 | 4.86  | 0.53 | 1.69 | 0.28 | monoclinic   | Ho     |
| 633 | PUSDOX   | 1081.42 | 7.10  | 0.48 | 1.11 | 0.27 | triclinic    | Zn     |
| 634 | LUFNAC03 | 1287.90 | 7.71  | 0.59 | 1.03 | 0.40 | triclinic    | Mn     |
| 635 | IBICIH   | 940.79  | 10.29 | 0.43 | 1.07 | 0.32 | other        | Zn     |
| 636 | GIFKIP   | 777.84  | 4.49  | 0.36 | 1.26 | 0.23 | monoclinic   | Cd, Ni |
| 637 | SADLIU   | 853.46  | 6.62  | 0.62 | 1.67 | 0.26 | tetragonal   | Yb     |
| 638 | IFEHUY   | 1443.21 | 11.28 | 0.67 | 1.04 | 0.53 | triclinic    | Mn     |
| 639 | IBICON   | 792.33  | 10.41 | 0.42 | 1.22 | 0.28 | other        | Zn     |
| 640 | NIKYUC02 | 377.76  | 4.87  | 0.29 | 1.67 | 0.15 | other        | Fe     |
| 641 | HEDCIE   | 1455.99 | 6.94  | 0.53 | 1.03 | 0.38 | triclinic    | Cu     |
| 642 | VETTOE   | 2234.61 | 6.95  | 0.72 | 0.90 | 0.57 | triclinic    | Pr     |
| 643 | NIGGAM   | 1875.96 | 7.28  | 0.71 | 1.22 | 0.48 | triclinic    | Ho     |
| 644 | HAFVUH   | 1549.86 | 7.22  | 0.63 | 0.94 | 0.49 | triclinic    | Mg     |
| 645 | BONMEX   | 1924.02 | 6.30  | 0.64 | 0.86 | 0.51 | triclinic    | Ni     |
| 646 | ALIXOJ   | 1877.78 | 7.79  | 0.62 | 0.98 | 0.48 | monoclinic   | Ni     |
| 647 | NERSUA   | 1736.67 | 7.12  | 0.59 | 0.98 | 0.43 | other        | Cu     |
| 648 | MOSDUT   | 938.87  | 4.75  | 0.45 | 1.12 | 0.25 | monoclinic   | Co     |
| 649 | LAWGIA   | 3733.66 | 15.08 | 0.83 | 0.59 | 1.27 | triclinic    | Zn     |
| 650 | NIKZEN01 | 309.91  | 4.85  | 0.27 | 1.73 | 0.13 | other        | Fe     |
| 651 | HAWWUZ   | 2162.41 | 6.75  | 0.69 | 1.03 | 0.53 | other        | Nd     |
| 652 | GOGWAB   | 1700.77 | 4.76  | 0.62 | 1.06 | 0.47 | triclinic    | Zn     |
| 653 | GIYTIS   | 1959.74 | 5.91  | 0.62 | 0.96 | 0.51 | triclinic    | Zn     |
| 654 | QOJVAM   | 789.54  | 5.22  | 0.58 | 1.39 | 0.25 | triclinic    | Cu     |
| 655 | RIDDUE   | 756.03  | 6.31  | 0.48 | 1.46 | 0.24 | triclinic    | Co     |
| 656 | KINDOC   | 1648.19 | 6.18  | 0.61 | 1.02 | 0.49 | triclinic    | Tm     |
| 657 | ODUNEH   | 1812.97 | 7.00  | 0.62 | 0.96 | 0.47 | triclinic    | Zn     |
| 658 | VICDOC   | 532.50  | 4.57  | 0.45 | 1.15 | 0.17 | triclinic    | Fe     |
| 659 | XIDBUJ   | 1058.98 | 7.47  | 0.50 | 1.10 | 0.31 | triclinic    | Zn     |
| 660 | PUSDIR   | 961.67  | 6.33  | 0.45 | 1.12 | 0.25 | triclinic    | Zn     |
| 661 | DARFAF   | 1353.25 | 7.42  | 0.60 | 1.14 | 0.39 | other        | Dy     |
| 662 | PEVQIS   | 3582.43 | 14.92 | 0.81 | 0.61 | 1.21 | rhombohedral | Zn     |
| 663 | UDANAQ   | 1095.46 | 6.36  | 0.55 | 1.08 | 0.33 | triclinic    | Zn     |
| 664 | NIHBEM02 | 347.52  | 4.86  | 0.28 | 1.70 | 0.14 | other        | Fe     |
| 665 | UXEHIP   | 1376.92 | 6.36  | 0.55 | 0.94 | 0.36 | orthorhombic | Zn     |
| 666 | TEWFUY01 | 451.31  | 4.79  | 0.38 | 1.20 | 0.13 | triclinic    | Cu     |
| 667 | XINRAP   | 1841.14 | 7.84  | 0.61 | 1.00 | 0.53 | triclinic    | Co     |
| 668 | BETDAH   | 1743.68 | 6.02  | 0.65 | 1.16 | 0.42 | triclinic    | Ho     |
| 669 | YIWPEZ   | 1387.87 | 6.78  | 0.52 | 1.25 | 0.44 | other        | Cd     |
| 670 | GULWOA   | 1282.16 | 7.26  | 0.57 | 1.28 | 0.37 | triclinic    | Cd     |
| 671 | NIKYUC01 | 316.63  | 4.74  | 0.27 | 1.71 | 0.14 | other        | Fe     |
| 672 | PEWXUL01 | 596.58  | 5.71  | 0.41 | 1.06 | 0.16 | triclinic    | Ni     |
| 673 | EKOPIE   | 1431.69 | 6.36  | 0.62 | 1.22 | 0.38 | other        | Cd, Sr |
| 674 | OGAGEJ   | 1454.28 | 5.42  | 0.55 | 1.06 | 0.36 | other        | Zn     |

|     |          |         |       |      |      |      |              |        |
|-----|----------|---------|-------|------|------|------|--------------|--------|
| 675 | YEKXET   | 2146.36 | 7.13  | 0.65 | 0.99 | 0.48 | tetragonal   | Zn     |
| 676 | BETFEN   | 1815.54 | 6.02  | 0.65 | 1.08 | 0.44 | triclinic    | Pr     |
| 677 | ADOBOL   | 189.25  | 5.65  | 0.29 | 1.72 | 0.06 | other        | Co, V  |
| 678 | ULUVUT   | 1238.46 | 4.98  | 0.52 | 1.15 | 0.39 | triclinic    | Zn     |
| 679 | COMDOY   | 972.61  | 5.66  | 0.60 | 1.23 | 0.31 | triclinic    | Ga     |
| 680 | BETFUD   | 1934.52 | 6.48  | 0.64 | 1.06 | 0.45 | triclinic    | Ce     |
| 681 | VACFUB   | 821.96  | 8.77  | 0.42 | 1.18 | 0.28 | other        | Zn     |
| 682 | LAZKUU   | 1223.65 | 6.58  | 0.51 | 1.00 | 0.31 | other        | Cd     |
| 683 | WEBREC   | 559.78  | 5.51  | 0.37 | 1.22 | 0.16 | other        | Zn     |
| 684 | WAMRIN02 | 1390.43 | 7.20  | 0.62 | 0.96 | 0.44 | other        | Mg     |
| 685 | REGREC   | 2516.22 | 7.69  | 0.75 | 0.90 | 0.70 | other        | Zn     |
| 686 | NESSOV   | 977.48  | 6.28  | 0.52 | 1.03 | 0.29 | triclinic    | Co     |
| 687 | WEMCAU   | 1084.38 | 4.84  | 0.56 | 1.75 | 0.27 | monoclinic   | Yb     |
| 688 | PIDMEV01 | 1401.96 | 7.92  | 0.57 | 1.06 | 0.38 | triclinic    | Zn     |
| 689 | UZIJJ    | 1656.48 | 6.70  | 0.61 | 1.02 | 0.40 | other        | Ce     |
| 690 | XEQGEH   | 327.71  | 4.62  | 0.28 | 1.15 | 0.09 | monoclinic   | Zn     |
| 691 | PIFPIE   | 1431.18 | 8.11  | 0.57 | 1.05 | 0.39 | triclinic    | Zn     |
| 692 | LUFNAC01 | 1329.04 | 7.73  | 0.59 | 1.03 | 0.40 | triclinic    | Mn     |
| 693 | XOHLEM01 | 1072.21 | 5.30  | 0.59 | 1.34 | 0.31 | other        | Zn     |
| 694 | ILOJOJ   | 561.70  | 6.13  | 0.31 | 1.28 | 0.17 | triclinic    | Cu     |
| 695 | BETGAK   | 1945.69 | 6.45  | 0.64 | 1.06 | 0.46 | triclinic    | La     |
| 696 | CAXXEG   | 856.98  | 6.32  | 0.45 | 1.21 | 0.21 | monoclinic   | Ni     |
| 697 | AWOFOI   | 1327.07 | 5.39  | 0.61 | 1.32 | 0.33 | other        | Ce     |
| 698 | GEDQOX   | 2033.34 | 6.25  | 0.67 | 1.08 | 0.47 | triclinic    | Nd     |
| 699 | AVIPAX   | 1741.40 | 7.22  | 0.62 | 0.96 | 0.46 | other        | Mg     |
| 700 | AVELOD   | 1678.45 | 8.08  | 0.54 | 0.92 | 0.45 | tetragonal   | Cu     |
| 701 | VAZTOG   | 3699.55 | 15.11 | 0.82 | 0.59 | 1.25 | triclinic    | Zn     |
| 702 | IGAHAB   | 1022.46 | 8.08  | 0.55 | 1.10 | 0.29 | other        | Cr, Cu |
| 703 | OYODEM   | 975.62  | 9.07  | 0.39 | 1.02 | 0.29 | other        | B, Zn  |
| 704 | UCEXOQ   | 785.45  | 6.35  | 0.52 | 1.48 | 0.24 | triclinic    | Er     |
| 705 | GUYLOC   | 1431.04 | 6.34  | 0.56 | 1.07 | 0.38 | triclinic    | Zn     |
| 706 | IBICAZ   | 927.50  | 10.27 | 0.43 | 1.07 | 0.32 | other        | Zn     |
| 707 | EZUCIM   | 1273.64 | 5.09  | 0.56 | 1.00 | 0.39 | orthorhombic | Zn     |
| 708 | HAFTOZ   | 3602.90 | 15.38 | 0.81 | 0.55 | 1.33 | triclinic    | Ni     |
| 709 | QOCRUW   | 869.98  | 5.83  | 0.51 | 1.38 | 0.27 | triclinic    | La     |
| 710 | ETEKAQ   | 1774.25 | 6.66  | 0.68 | 1.13 | 0.46 | triclinic    | Gd     |
| 711 | IXURID   | 1100.31 | 5.48  | 0.51 | 1.15 | 0.30 | triclinic    | Zn     |
| 712 | SUGWEX03 | 909.17  | 5.87  | 0.47 | 1.09 | 0.24 | other        | Cu     |
| 713 | CAYBAH   | 447.78  | 5.33  | 0.32 | 1.49 | 0.14 | tetragonal   | Cu     |
| 714 | HOMZEP   | 816.97  | 8.52  | 0.71 | 1.30 | 0.23 | other        | Ga     |
| 715 | DONNAW01 | 1195.33 | 6.80  | 0.62 | 1.16 | 0.37 | triclinic    | Ga     |
| 716 | RIWSUM   | 810.47  | 5.69  | 0.42 | 1.11 | 0.18 | other        | Cd     |
| 717 | NIGFIT   | 1840.48 | 7.27  | 0.71 | 1.23 | 0.47 | triclinic    | Er     |
| 718 | LOBHAM   | 1434.23 | 6.51  | 0.58 | 1.02 | 0.40 | other        | Ni     |
| 719 | NAXVOY02 | 350.88  | 4.78  | 0.28 | 1.39 | 0.14 | other        | Mg     |



|     |          |         |       |      |      |      |              |        |
|-----|----------|---------|-------|------|------|------|--------------|--------|
| 720 | UGAQEY   | 632.30  | 4.82  | 0.44 | 1.29 | 0.15 | tetragonal   | Mo, Ni |
| 721 | DUXZIG01 | 2363.42 | 6.00  | 0.59 | 1.05 | 0.59 | tetragonal   | Ni, Zn |
| 722 | OQANIE   | 984.84  | 7.69  | 0.54 | 1.08 | 0.26 | orthorhombic | Cu     |
| 723 | SEHTAB   | 1259.18 | 5.17  | 0.67 | 1.41 | 0.35 | other        | Yb     |
| 724 | NIKZEN02 | 347.02  | 4.93  | 0.28 | 1.70 | 0.14 | other        | Fe     |
| 725 | OBEDEE   | 1671.89 | 5.86  | 0.57 | 0.93 | 0.43 | monoclinic   | Ag     |
| 726 | FAFMAC   | 808.67  | 6.91  | 0.41 | 1.26 | 0.23 | other        | Ag     |
| 727 | ACOLUB   | 1218.50 | 7.70  | 0.52 | 1.08 | 0.31 | triclinic    | Cd     |
| 728 | YUKKAR   | 1227.51 | 5.63  | 0.52 | 1.15 | 0.31 | triclinic    | Mn     |
| 729 | GERWEH   | 1216.69 | 9.32  | 0.64 | 1.11 | 0.39 | other        | Cu, Si |
| 730 | COWMOR   | 1514.88 | 6.85  | 0.63 | 1.25 | 0.42 | monoclinic   | Er     |
| 731 | SAMLAV02 | 1145.48 | 5.85  | 0.53 | 1.20 | 0.33 | other        | Cd     |
| 732 | RUVMAX   | 1013.66 | 5.03  | 0.53 | 1.20 | 0.28 | triclinic    | Zn     |
| 733 | FUNBIA   | 1290.69 | 7.93  | 0.53 | 0.99 | 0.38 | orthorhombic | Zn     |
| 734 | FAPTOH   | 1774.60 | 7.34  | 0.64 | 1.03 | 0.45 | orthorhombic | Cd     |
| 735 | KEDQAN   | 572.02  | 6.55  | 0.36 | 1.24 | 0.16 | orthorhombic | Zn     |
| 736 | YANBAR01 | 265.31  | 4.38  | 0.27 | 1.82 | 0.10 | other        | Co     |
| 737 | GIVDUL   | 715.45  | 6.58  | 0.39 | 1.82 | 0.17 | tetragonal   | Cu     |
| 738 | ISENUQ   | 736.40  | 6.17  | 0.42 | 1.30 | 0.17 | other        | Dy, Ni |
| 739 | YEYFEP   | 1626.41 | 7.17  | 0.65 | 1.20 | 0.41 | tetragonal   | Ho     |
| 740 | FAPTIB   | 1611.47 | 7.30  | 0.63 | 1.03 | 0.43 | orthorhombic | Cd     |
| 741 | DARFEJ   | 1290.31 | 7.37  | 0.60 | 1.17 | 0.35 | other        | Ho     |
| 742 | PEWGEF   | 1615.47 | 9.91  | 0.59 | 1.04 | 0.52 | triclinic    | Cu     |
| 743 | MATTOR   | 482.34  | 5.44  | 0.43 | 1.24 | 0.15 | triclinic    | Zn     |
| 744 | NIGGIU   | 1834.38 | 7.16  | 0.74 | 1.27 | 0.46 | triclinic    | Yb     |
| 745 | HOWPUF   | 1929.06 | 7.89  | 0.65 | 0.97 | 0.52 | orthorhombic | Zn     |
| 746 | DARDOR   | 1323.47 | 7.67  | 0.60 | 1.14 | 0.38 | other        | Gd     |
| 747 | XEXLUJ   | 1125.08 | 9.09  | 0.52 | 1.12 | 0.36 | other        | Zn     |
| 748 | COGWEB   | 1773.59 | 6.48  | 0.60 | 0.92 | 0.44 | tetragonal   | Zn     |
| 749 | PIDMEV   | 1474.91 | 7.96  | 0.58 | 1.03 | 0.40 | triclinic    | Zn     |
| 750 | GADMAA   | 604.64  | 8.30  | 0.37 | 1.50 | 0.19 | other        | Gd, Zn |
| 751 | SARBOE   | 627.69  | 4.85  | 0.47 | 1.20 | 0.21 | orthorhombic | Zn     |
| 752 | IPIJUM   | 502.28  | 5.56  | 0.44 | 1.74 | 0.13 | triclinic    | Er     |
| 753 | AWEJIW   | 968.60  | 11.17 | 0.55 | 1.19 | 0.35 | triclinic    | Cd     |
| 754 | IWELOM   | 227.96  | 4.71  | 0.37 | 1.86 | 0.08 | triclinic    | Co     |
| 755 | LUSJIT   | 878.05  | 5.99  | 0.47 | 1.19 | 0.28 | triclinic    | Mn     |
| 756 | DEYJIC   | 756.48  | 4.95  | 0.49 | 1.26 | 0.25 | triclinic    | Ni, V  |
| 757 | TUTJAU   | 1236.99 | 6.85  | 0.57 | 1.06 | 0.36 | other        | Mn     |
| 758 | KONYOB   | 293.58  | 4.80  | 0.19 | 1.37 | 0.10 | triclinic    | Cd, Ni |
| 759 | VICYUD   | 1020.11 | 5.83  | 0.50 | 1.15 | 0.25 | other        | Zn     |
| 760 | SAMLAV01 | 897.52  | 5.54  | 0.51 | 1.23 | 0.28 | other        | Cd     |
| 761 | AROFAP   | 1030.86 | 5.92  | 0.55 | 1.17 | 0.28 | triclinic    | Cd     |
| 762 | RAZYIC   | 1044.04 | 7.88  | 0.64 | 1.41 | 0.31 | triclinic    | Cu     |
| 763 | FEZREJ   | 1333.20 | 6.46  | 0.62 | 1.32 | 0.34 | other        | Ba, Cd |
| 764 | ODODES   | 1454.70 | 5.97  | 0.55 | 0.99 | 0.36 | triclinic    | Si, Zn |

|     |          |         |       |      |      |      |              |        |
|-----|----------|---------|-------|------|------|------|--------------|--------|
| 765 | UJIZET   | 1529.87 | 7.14  | 0.62 | 1.16 | 0.42 | other        | Nd     |
| 766 | QOMFAA   | 1028.69 | 5.60  | 0.52 | 1.08 | 0.35 | triclinic    | Zn     |
| 767 | LUQGAG   | 1209.12 | 7.27  | 0.50 | 1.09 | 0.32 | triclinic    | Co     |
| 768 | SABVOH01 | 1367.85 | 6.24  | 0.68 | 1.01 | 0.43 | orthorhombic | Al     |
| 769 | DARFIN   | 1250.73 | 7.42  | 0.59 | 1.18 | 0.34 | other        | Er     |
| 770 | ETEJUU   | 1811.14 | 6.69  | 0.67 | 1.11 | 0.47 | triclinic    | Sm     |
| 771 | WEMFIF   | 1139.82 | 4.86  | 0.53 | 1.67 | 0.28 | monoclinic   | Dy     |
| 772 | BETDEL   | 1682.41 | 6.63  | 0.65 | 1.16 | 0.42 | triclinic    | Dy     |
| 773 | VACFUB01 | 815.20  | 8.98  | 0.43 | 1.18 | 0.29 | other        | Zn     |
| 774 | LUFNAC05 | 1285.29 | 7.58  | 0.59 | 1.03 | 0.40 | triclinic    | Mn     |
| 775 | MURCOR   | 562.39  | 8.11  | 0.35 | 1.58 | 0.18 | other        | Cu, Ho |
| 776 | TENLIJ   | 904.53  | 5.33  | 0.47 | 1.14 | 0.25 | triclinic    | Zn     |
| 777 | KIFKEQ   | 1118.15 | 4.86  | 0.55 | 0.93 | 0.29 | other        | Mg     |
| 778 | WEBKOD   | 1085.63 | 6.62  | 0.54 | 1.28 | 0.32 | triclinic    | Cd     |
| 779 | ATAFIK   | 1465.29 | 6.27  | 0.66 | 1.22 | 0.40 | other        | Zn     |
| 780 | UJARAZ   | 1028.52 | 5.67  | 0.56 | 1.15 | 0.30 | triclinic    | Ni     |
| 781 | FEYQIK   | 875.46  | 5.77  | 0.49 | 1.30 | 0.27 | triclinic    | Pr     |
| 782 | SEQTEP   | 1246.39 | 7.44  | 0.51 | 0.97 | 0.35 | triclinic    | Mn     |
| 783 | AFOVAT   | 1401.53 | 8.24  | 0.62 | 1.04 | 0.44 | triclinic    | La     |
| 784 | BASJUB   | 1226.81 | 5.35  | 0.49 | 1.03 | 0.32 | tetragonal   | Co     |
| 785 | TECVEE   | 792.66  | 6.02  | 0.43 | 1.17 | 0.25 | triclinic    | Ca     |
| 786 | FEDBEX   | 795.56  | 5.53  | 0.45 | 1.57 | 0.21 | triclinic    | Tm     |
| 787 | GEDDEA   | 1079.16 | 10.14 | 0.51 | 1.30 | 0.30 | triclinic    | Ni     |
| 788 | NAZBAT   | 988.82  | 7.37  | 0.68 | 1.03 | 0.27 | triclinic    | In     |
| 789 | CIWYUD   | 772.58  | 6.99  | 0.48 | 1.41 | 0.27 | triclinic    | Co     |
| 790 | EDAGEX   | 300.81  | 4.80  | 0.28 | 1.79 | 0.12 | other        | Co     |
| 791 | BAKJEE   | 2179.15 | 6.02  | 0.67 | 0.92 | 0.53 | other        | Co     |
| 792 | LAGPAM   | 769.23  | 5.52  | 0.49 | 1.30 | 0.25 | triclinic    | Y      |
| 793 | VATYEV   | 1025.63 | 5.70  | 0.52 | 1.60 | 0.30 | triclinic    | Gd     |
| 794 | ZILBED   | 758.15  | 4.97  | 0.49 | 0.95 | 0.22 | other        | Co     |
| 795 | IJASAO01 | 791.99  | 6.15  | 0.45 | 1.22 | 0.21 | triclinic    | Er     |
| 796 | DEKHUX   | 1122.14 | 6.50  | 0.52 | 1.05 | 0.34 | triclinic    | Mn     |
| 797 | PEYSIW   | 572.58  | 5.70  | 0.40 | 1.06 | 0.17 | triclinic    | Ni     |
| 798 | HAMREU   | 409.09  | 7.37  | 0.32 | 1.80 | 0.14 | other        | Ce, Cu |
| 799 | QESYOD   | 517.61  | 7.45  | 0.34 | 1.70 | 0.12 | triclinic    | Cu     |
| 800 | ADAXEK   | 783.51  | 5.75  | 0.48 | 1.26 | 0.25 | triclinic    | Co     |
| 801 | XOMJUE   | 317.05  | 6.43  | 0.41 | 1.22 | 0.08 | other        | Er     |
| 802 | YEGCUJ   | 672.97  | 7.32  | 0.43 | 1.37 | 0.19 | cubic        | Pd     |
| 803 | PURJES   | 1131.00 | 6.31  | 0.57 | 1.08 | 0.33 | triclinic    | Zn     |
| 804 | LIFWEE   | 413.59  | 4.91  | 0.48 | 1.29 | 0.17 | tetragonal   | Cu     |
| 805 | SABVOH   | 1350.78 | 6.00  | 0.67 | 1.00 | 0.43 | orthorhombic | Al     |
| 806 | GEDSUF   | 954.00  | 7.26  | 0.53 | 1.21 | 0.27 | triclinic    | Nd     |
| 807 | SUJNUH   | 664.47  | 7.55  | 0.38 | 1.25 | 0.20 | other        | Cu     |
| 808 | XAKQOR   | 1097.82 | 5.54  | 0.53 | 0.97 | 0.30 | triclinic    | Cu     |
| 809 | NEHNEV   | 1582.76 | 6.06  | 0.56 | 0.97 | 0.43 | triclinic    | Zn     |

|     |          |         |       |      |      |      |              |        |
|-----|----------|---------|-------|------|------|------|--------------|--------|
| 810 | FEFZOF   | 401.49  | 4.75  | 0.40 | 1.78 | 0.14 | orthorhombic | Co, Hg |
| 811 | KOFPEB05 | 420.27  | 7.29  | 0.32 | 1.79 | 0.14 | other        | Cu, La |
| 812 | IXUWII   | 1472.38 | 7.75  | 0.56 | 0.93 | 0.39 | triclinic    | Co     |
| 813 | IBICED   | 789.86  | 10.36 | 0.42 | 1.23 | 0.28 | other        | Zn     |
| 814 | SUNHUF   | 976.90  | 6.56  | 0.52 | 1.27 | 0.29 | other        | Nd     |
| 815 | COWMAD   | 1535.89 | 6.89  | 0.63 | 1.22 | 0.43 | monoclinic   | Dy     |
| 816 | NEKBEL   | 382.62  | 4.87  | 0.30 | 1.60 | 0.11 | monoclinic   | Co, W  |
| 817 | EXEWAG   | 1314.98 | 8.05  | 0.55 | 1.07 | 0.37 | triclinic    | Zn     |
| 818 | YEYBOV   | 262.82  | 4.80  | 0.17 | 1.50 | 0.07 | triclinic    | Ba     |
| 819 | DARDAD   | 1244.04 | 7.21  | 0.60 | 1.20 | 0.34 | other        | Lu     |
| 820 | BETDAH   | 1803.70 | 6.02  | 0.65 | 1.11 | 0.43 | triclinic    | Sm     |
| 821 | NIHBIQ01 | 427.06  | 5.00  | 0.30 | 1.65 | 0.16 | other        | Fe     |
| 822 | SEHSUU   | 1329.64 | 5.20  | 0.64 | 1.38 | 0.35 | other        | Er     |
| 823 | SEHTEF   | 1706.10 | 5.43  | 0.66 | 1.08 | 0.46 | other        | Y      |
| 824 | WEMGAY   | 1035.59 | 5.42  | 0.49 | 1.10 | 0.33 | orthorhombic | Be     |
| 825 | SAMLAV03 | 1141.03 | 6.04  | 0.53 | 1.20 | 0.33 | orthorhombic | Cd     |
| 826 | KUXLUL   | 1626.52 | 5.44  | 0.65 | 1.22 | 0.42 | orthorhombic | Cu     |
| 827 | XUMFIV   | 801.93  | 4.67  | 0.42 | 1.08 | 0.24 | triclinic    | Cu     |
| 828 | GIYSAJ   | 119.42  | 5.49  | 0.27 | 1.56 | 0.04 | orthorhombic | La     |
| 829 | XOPVII   | 1325.25 | 6.84  | 0.51 | 1.06 | 0.35 | triclinic    | Ni     |
| 830 | ELIKIU   | 529.68  | 5.02  | 0.42 | 1.55 | 0.16 | triclinic    | Sm     |
| 831 | MOYMET   | 1006.20 | 9.09  | 0.45 | 1.00 | 0.34 | other        | Co     |
| 832 | CUNWEO   | 836.90  | 6.91  | 0.46 | 1.23 | 0.26 | other        | Cd     |
| 833 | REJLIC   | 1365.32 | 7.38  | 0.53 | 1.09 | 0.33 | triclinic    | Co     |
| 834 | XEKCAT01 | 2258.84 | 5.68  | 0.67 | 0.93 | 0.52 | other        | Mg     |
| 835 | GIYSUD   | 1423.04 | 5.31  | 0.57 | 1.22 | 0.35 | triclinic    | Cd     |
| 836 | JASNAT   | 599.40  | 4.82  | 0.41 | 1.25 | 0.18 | triclinic    | Zn     |
| 837 | VAGTUU   | 566.48  | 6.30  | 0.53 | 1.19 | 0.16 | other        | Zn     |
| 838 | LAVTEJ   | 874.00  | 6.71  | 0.60 | 1.59 | 0.28 | tetragonal   | Dy     |
| 839 | GAXKOH   | 1675.06 | 10.42 | 0.61 | 0.96 | 0.50 | other        | Cd, K  |
| 840 | GOKBUE   | 688.24  | 6.19  | 0.40 | 1.63 | 0.21 | triclinic    | Cu     |
| 841 | WEMFAX   | 1222.57 | 4.90  | 0.53 | 1.61 | 0.31 | monoclinic   | Gd     |
| 842 | QAVWAN   | 828.31  | 6.47  | 0.47 | 1.14 | 0.25 | triclinic    | Zn     |
| 843 | WASTUG   | 1208.19 | 10.45 | 0.63 | 1.59 | 0.34 | orthorhombic | La, Mo |
| 844 | RUMWUS   | 995.02  | 6.09  | 0.54 | 1.11 | 0.30 | triclinic    | Zn     |
| 845 | IFENOY02 | 343.41  | 7.27  | 0.19 | 1.32 | 0.11 | triclinic    | Zn     |
| 846 | LAGBUS   | 1099.80 | 7.73  | 0.49 | 1.19 | 0.29 | other        | Ag, Fe |
| 847 | LUFNAC02 | 1295.27 | 7.69  | 0.59 | 1.03 | 0.40 | triclinic    | Mn     |
| 848 | GUWDUY   | 1358.58 | 6.14  | 0.56 | 0.98 | 0.38 | triclinic    | La     |
| 849 | IFENOY   | 341.12  | 7.30  | 0.18 | 1.35 | 0.10 | triclinic    | Zn     |
| 850 | LETFEW   | 326.28  | 5.62  | 0.26 | 2.12 | 0.08 | orthorhombic | Cu     |
| 851 | UKAPUS   | 1269.72 | 7.01  | 0.59 | 1.14 | 0.38 | triclinic    | Nd     |
| 852 | GAYFOD   | 1110.97 | 5.94  | 0.57 | 1.15 | 0.38 | other        | Zn     |
| 853 | IBASEL   | 424.05  | 7.43  | 0.32 | 1.77 | 0.14 | other        | Cu, La |
| 854 | TAGSEB   | 590.75  | 5.66  | 0.34 | 1.33 | 0.14 | orthorhombic | Cu, V  |

|     |              |         |       |      |      |      |              |            |
|-----|--------------|---------|-------|------|------|------|--------------|------------|
| 855 | DOCKOW       | 478.71  | 6.95  | 0.26 | 1.39 | 0.13 | triclinic    | Mn,Zn      |
| 856 | FAMBUS       | 1013.68 | 6.22  | 0.53 | 1.17 | 0.31 | triclinic    | Cd         |
| 857 | INIRAY       | 751.84  | 6.64  | 0.32 | 1.15 | 0.20 | triclinic    | Co, Ni     |
| 858 | EDAFUM       | 305.92  | 4.88  | 0.28 | 1.77 | 0.12 | other        | Co         |
| 859 | TOLGOR       | 988.91  | 5.96  | 0.45 | 1.18 | 0.24 | other        | Cd         |
| 860 | INIQR        | 687.79  | 6.36  | 0.30 | 1.16 | 0.18 | triclinic    | Fe, Ni     |
| 861 | GESFAN       | 774.91  | 7.31  | 0.34 | 1.06 | 0.25 | triclinic    | Ni         |
| 862 | FIHFAF       | 1017.22 | 5.88  | 0.51 | 1.21 | 0.31 | triclinic    | Co         |
| 863 | RAVWAO       | 2624.70 | 17.93 | 0.76 | 0.54 | 1.26 | triclinic    | Mg         |
| 864 | KEVVIS       | 741.67  | 6.98  | 0.37 | 1.16 | 0.21 | other        | Co         |
| 865 | COYCEZ       | 1188.99 | 6.15  | 0.52 | 1.16 | 0.28 | other        | Cu, Mo     |
| 866 | QAQRUW01     | 1974.91 | 6.61  | 0.62 | 0.85 | 0.52 | triclinic    | Mg         |
| 867 | EFOTEZ       | 740.41  | 4.98  | 0.55 | 2.68 | 0.16 | orthorhombic | Mn, Re, Se |
| 868 | CITZIP       | 851.23  | 6.68  | 0.51 | 1.43 | 0.27 | triclinic    | Co         |
| 869 | GITWIQ       | 408.25  | 5.05  | 0.32 | 1.55 | 0.12 | triclinic    | Zn         |
| 870 | KIFJUF       | 2683.08 | 5.58  | 0.59 | 0.82 | 0.59 | other        | Mg         |
| 871 | PIZPET       | 917.38  | 4.81  | 0.49 | 1.31 | 0.27 | other        | Y          |
| 872 | KAWBOB       | 1281.01 | 7.30  | 0.53 | 1.08 | 0.38 | monoclinic   | Mn         |
| 873 | BURJOO       | 1506.84 | 5.25  | 0.59 | 0.98 | 0.37 | other        | Mn         |
| 874 | MODNUO       | 348.82  | 4.51  | 0.29 | 1.61 | 0.08 | orthorhombic | Cd         |
| 875 | ETEJOD01     | 1984.43 | 6.56  | 0.68 | 1.10 | 0.50 | triclinic    | Nd         |
| 876 | TOHYUL       | 1017.66 | 7.11  | 0.51 | 1.34 | 0.30 | orthorhombic | Cd         |
| 877 | GUYMAP       | 1363.39 | 7.33  | 0.55 | 1.08 | 0.37 | triclinic    | Zn         |
| 878 | XIHSAJ       | 1373.16 | 5.88  | 0.58 | 1.01 | 0.38 | triclinic    | Co         |
| 879 | BUVXOG       | 528.64  | 6.83  | 0.25 | 1.27 | 0.14 | triclinic    | Fe         |
| 880 | FAZPED       | 410.95  | 7.63  | 0.30 | 1.65 | 0.13 | triclinic    | Co         |
| 881 | IKETAU       | 867.10  | 5.59  | 0.50 | 1.55 | 0.25 | triclinic    | Nd         |
| 882 | EGATOW       | 1383.36 | 5.82  | 0.63 | 1.21 | 0.36 | other        | Co, Zn     |
| 883 | MARXEK       | 794.45  | 6.54  | 0.61 | 1.69 | 0.27 | tetragonal   | Lu         |
| 884 | LAVTUZ       | 815.58  | 6.59  | 0.62 | 1.67 | 0.27 | tetragonal   | Yb         |
| 885 | NIHQIQ02     | 457.68  | 4.95  | 0.31 | 1.63 | 0.17 | other        | Fe         |
| 886 | BOJCIN       | 518.70  | 5.77  | 0.28 | 1.11 | 0.13 | triclinic    | Mo         |
| 887 | WUTBES       | 403.07  | 7.40  | 0.32 | 1.78 | 0.14 | other        | Cu, La     |
| 888 | BIYTEJ       | 666.48  | 6.20  | 0.40 | 1.39 | 0.20 | other        | Zn         |
| 889 | NAGQET       | 683.66  | 6.41  | 0.36 | 1.17 | 0.18 | triclinic    | Co         |
| 890 | LIGHAM       | 896.25  | 5.79  | 0.40 | 1.05 | 0.25 | triclinic    | Mn         |
| 891 | CEGDUO       | 269.12  | 4.93  | 0.27 | 1.92 | 0.09 | orthorhombic | Ag         |
| 892 | DARCUW       | 1238.70 | 7.25  | 0.60 | 1.20 | 0.34 | other        | Yb         |
| 893 | XUVHEB       | 1087.37 | 5.92  | 0.52 | 1.08 | 0.31 | orthorhombic | Zn         |
| 894 | RUWWOW       | 592.30  | 5.07  | 0.42 | 1.49 | 0.17 | triclinic    | La         |
| 895 | ADIQEL       | 375.12  | 4.25  | 0.43 | 1.24 | 0.21 | monoclinic   | Co         |
| 896 | OKITIM       | 523.85  | 4.83  | 0.40 | 1.22 | 0.12 | tetragonal   | Cd         |
| 897 | CUIMDZ01_cle | 48.56   | 5.07  | 0.07 | 1.67 | 0.03 | triclinic    | Cu         |
| 898 | RUWWOW01     | 597.57  | 5.09  | 0.42 | 1.49 | 0.18 | triclinic    | La         |
| 899 | OXITOF       | 838.08  | 5.85  | 0.43 | 1.25 | 0.24 | triclinic    | Co         |

|     |          |         |      |      |      |      |              |        |
|-----|----------|---------|------|------|------|------|--------------|--------|
| 900 | OTAVOV   | 1413.75 | 5.82 | 0.47 | 1.05 | 0.31 | orthorhombic | La     |
| 901 | UJAQUS   | 1767.27 | 6.89 | 0.66 | 0.99 | 0.49 | orthorhombic | Zn     |
| 902 | JOHFIW   | 1108.39 | 6.57 | 0.60 | 1.30 | 0.34 | tetragonal   | Y      |
| 903 | OKIWUB   | 483.52  | 4.72 | 0.38 | 1.21 | 0.12 | tetragonal   | Cd     |
| 904 | OKILEA   | 498.67  | 6.35 | 0.40 | 1.16 | 0.13 | triclinic    | Mn     |
| 905 | PIXPET   | 681.98  | 4.78 | 0.39 | 1.14 | 0.20 | other        | Zn     |
| 906 | RUWXEN   | 650.90  | 5.09 | 0.43 | 1.47 | 0.19 | triclinic    | La     |
| 907 | LUSJEP   | 868.94  | 6.00 | 0.48 | 1.19 | 0.28 | triclinic    | Mn     |
| 908 | OKIXIQ02 | 479.62  | 5.01 | 0.38 | 1.20 | 0.12 | tetragonal   | Cd     |
| 909 | ANENIR   | 477.95  | 6.21 | 0.30 | 1.33 | 0.15 | triclinic    | La     |
| 910 | TOZHAR   | 646.57  | 4.64 | 0.52 | 1.35 | 0.26 | orthorhombic | Ag     |
| 911 | ABUWOJ   | 938.32  | 4.67 | 0.54 | 1.16 | 0.24 | orthorhombic | Zn     |
| 912 | EPEWEC   | 744.42  | 5.90 | 0.41 | 1.27 | 0.22 | tetragonal   | Co     |
| 913 | IYUJAO   | 666.80  | 6.37 | 0.40 | 1.40 | 0.16 | triclinic    | In     |
| 914 | ELIKEQ   | 559.86  | 5.04 | 0.43 | 1.51 | 0.16 | triclinic    | Nd     |
| 915 | DEYLUQ   | 507.17  | 7.03 | 0.37 | 1.62 | 0.14 | triclinic    | Cd     |
| 916 | CANRUG   | 1641.58 | 6.58 | 0.58 | 0.88 | 0.36 | other        | Ca, Si |
| 917 | KABXIW   | 1508.64 | 5.40 | 0.60 | 1.14 | 0.41 | triclinic    | Pr     |
| 918 | SAHYAD   | 492.91  | 5.58 | 0.38 | 1.20 | 0.12 | tetragonal   | Cd     |
| 919 | MOF-70   | 724.52  | 4.98 | 0.58 | 1.69 | 0.21 | other        | Pb     |
| 920 | DAWCAH   | 613.12  | 5.77 | 0.39 | 1.35 | 0.19 | orthorhombic | Ni     |
| 921 | YANBAR02 | 348.97  | 4.89 | 0.29 | 1.73 | 0.15 | other        | Co     |
| 922 | ASADAA   | 717.88  | 5.87 | 0.44 | 1.52 | 0.18 | triclinic    | Cd     |
| 923 | NAKLIW   | 965.98  | 4.72 | 0.55 | 1.16 | 0.25 | orthorhombic | Zn     |
| 924 | VAGTAA   | 1707.35 | 5.66 | 0.60 | 0.87 | 0.54 | triclinic    | Mg     |
| 925 | KAYBIX   | 934.32  | 5.66 | 0.57 | 1.21 | 0.30 | monoclinic   | Ca     |
| 926 | SERKAC   | 694.62  | 8.94 | 0.47 | 1.63 | 0.22 | other        | Er     |
| 927 | PORVUO   | 852.68  | 4.20 | 0.50 | 1.06 | 0.29 | triclinic    | Zn     |
| 928 | DEFKUU   | 774.71  | 5.42 | 0.46 | 1.71 | 0.21 | monoclinic   | Cu     |
| 929 | OFESIC   | 410.94  | 7.36 | 0.32 | 1.82 | 0.14 | other        | Cu, Sm |
| 930 | NIHBIQ   | 409.69  | 4.98 | 0.29 | 1.67 | 0.15 | other        | Fe     |
| 931 | ITIWIS   | 463.23  | 5.38 | 0.37 | 1.22 | 0.11 | tetragonal   | Cd     |
| 932 | OKIVAG   | 455.82  | 4.78 | 0.32 | 1.31 | 0.12 | tetragonal   | Cd     |
| 933 | WUNSI01  | 480.50  | 4.81 | 0.38 | 1.20 | 0.12 | tetragonal   | Cd     |
| 934 | ZEZQEC   | 1083.55 | 6.68 | 0.54 | 1.25 | 0.34 | triclinic    | Gd     |
| 935 | LAVSUY   | 1073.77 | 6.62 | 0.61 | 1.28 | 0.35 | tetragonal   | Y      |
| 936 | FIJDIM07 | 889.62  | 5.57 | 0.52 | 1.23 | 0.27 | triclinic    | Mn     |
| 937 | ADOBAX   | 196.31  | 5.52 | 0.31 | 1.64 | 0.06 | other        | Mn, V  |
| 938 | TOKDON   | 1563.19 | 5.47 | 0.65 | 1.19 | 0.40 | monoclinic   | Cd     |
| 939 | CENPUI   | 874.07  | 6.14 | 0.48 | 1.00 | 0.29 | triclinic    | Mg     |
| 940 | CIFDUS   | 1431.81 | 5.87 | 0.58 | 0.98 | 0.38 | other        | Mn     |
| 941 | IWELIG   | 208.00  | 4.67 | 0.37 | 1.86 | 0.08 | triclinic    | Co     |
| 942 | XEXLIX   | 841.65  | 7.38 | 0.45 | 1.24 | 0.25 | other        | Zn     |
| 943 | MICDEJ   | 861.13  | 5.28 | 0.44 | 1.18 | 0.23 | triclinic    | Mn     |
| 944 | NIBXUT   | 648.62  | 5.91 | 0.44 | 1.94 | 0.17 | orthorhombic | Gd     |

|     |          |         |      |      |      |      |              |        |
|-----|----------|---------|------|------|------|------|--------------|--------|
| 945 | EJEJIX01 | 2001.86 | 6.61 | 0.66 | 1.08 | 0.50 | triclinic    | La     |
| 946 | CAYSOK   | 529.49  | 7.16 | 0.25 | 1.16 | 0.14 | triclinic    | Mn     |
| 947 | SOQDEI   | 1464.85 | 5.36 | 0.56 | 1.02 | 0.40 | other        | Cd     |
| 948 | KOFPEB   | 422.76  | 7.32 | 0.32 | 1.78 | 0.14 | other        | Cu, La |
| 949 | HOXKUB   | 609.14  | 6.18 | 0.51 | 1.72 | 0.18 | other        | Yb     |
| 950 | WIJDAV   | 817.20  | 6.62 | 0.49 | 1.45 | 0.25 | other        | Zn     |
| 951 | OCUGEZ   | 858.33  | 5.75 | 0.49 | 1.32 | 0.28 | triclinic    | Nd     |
| 952 | YAQDIF   | 490.67  | 4.25 | 0.53 | 1.14 | 0.12 | triclinic    | Cd     |
| 953 | QAQSAD   | 623.68  | 4.90 | 0.45 | 1.22 | 0.20 | triclinic    | Zn     |
| 954 | HIFTUM   | 680.74  | 6.02 | 0.30 | 1.17 | 0.19 | triclinic    | Fe, Ni |
| 955 | FECKAA   | 693.76  | 5.75 | 0.46 | 0.98 | 0.16 | triclinic    | Zn     |
| 956 | WOPDEL   | 255.28  | 4.88 | 0.19 | 1.21 | 0.10 | triclinic    | Mn     |
| 957 | GEDSAL   | 1495.23 | 5.25 | 0.61 | 1.17 | 0.34 | triclinic    | Nd     |
| 958 | ILIGAL   | 335.16  | 5.39 | 0.31 | 1.84 | 0.13 | other        | Pr     |
| 959 | WIWHUG   | 288.56  | 4.82 | 0.30 | 1.45 | 0.12 | other        | Cu     |
| 960 | OBUFIB   | 319.33  | 4.72 | 0.29 | 1.57 | 0.11 | triclinic    | Zn     |
| 961 | LUMZUO   | 1115.08 | 5.90 | 0.61 | 1.87 | 0.26 | triclinic    | Mn, W  |
| 962 | AFUPEX   | 1322.86 | 5.39 | 0.64 | 1.39 | 0.34 | other        | Tm     |
| 963 | WOHBOL   | 594.84  | 5.79 | 0.32 | 1.36 | 0.18 | triclinic    | Cu     |
| 964 | DAWBIO   | 504.44  | 4.95 | 0.35 | 1.40 | 0.17 | orthorhombic | Co     |
| 965 | JEBCOJ   | 373.32  | 7.20 | 0.32 | 1.89 | 0.13 | other        | Cu, Sm |
| 966 | ACODED   | 908.90  | 6.28 | 0.51 | 1.13 | 0.24 | orthorhombic | Cu     |
| 967 | NEJSEC   | 520.81  | 5.34 | 0.41 | 1.24 | 0.15 | triclinic    | Cu     |
| 968 | OCUGEZ01 | 854.60  | 5.79 | 0.49 | 1.30 | 0.28 | triclinic    | Nd     |
| 969 | WEFXIQ   | 1231.34 | 6.83 | 0.54 | 1.06 | 0.36 | monoclinic   | Ni     |
| 970 | NOFRAC   | 801.13  | 5.83 | 0.62 | 2.12 | 0.20 | other        | As, Pb |
| 971 | EBEXEQ01 | 847.25  | 6.93 | 0.59 | 1.61 | 0.28 | tetragonal   | Gd     |
| 972 | WUTBIW   | 395.82  | 7.27 | 0.32 | 1.84 | 0.13 | other        | Cu, Nd |
| 973 | AFOVIB   | 1342.49 | 8.71 | 0.63 | 1.09 | 0.43 | triclinic    | Gd     |
| 974 | ZEBMAW   | 1391.74 | 7.36 | 0.57 | 1.03 | 0.34 | triclinic    | Ce, Si |
| 975 | RIXBIK   | 756.16  | 6.71 | 0.40 | 1.15 | 0.24 | other        | Mn     |
| 976 | QEFNAQ   | 541.50  | 6.29 | 0.34 | 1.29 | 0.17 | cubic        | Cu     |
| 977 | COWMUX   | 1496.77 | 6.84 | 0.63 | 1.26 | 0.42 | monoclinic   | Tm     |
| 978 | IWELIG01 | 209.64  | 4.59 | 0.37 | 1.87 | 0.08 | triclinic    | Co     |
| 979 | ELIKAM   | 586.30  | 5.09 | 0.43 | 1.50 | 0.17 | triclinic    | Pr     |
| 980 | PEPLOM   | 915.46  | 5.47 | 0.48 | 1.20 | 0.26 | orthorhombic | V      |
| 981 | GALCED   | 922.97  | 7.18 | 0.46 | 1.21 | 0.26 | other        | Cd     |
| 982 | KABXES   | 1444.02 | 5.53 | 0.59 | 1.18 | 0.38 | triclinic    | Sm     |
| 983 | PENNUT   | 755.10  | 5.29 | 0.40 | 1.35 | 0.21 | triclinic    | Zn     |
| 984 | NEVPUA   | 446.07  | 6.03 | 0.29 | 1.66 | 0.13 | other        | Cu     |
| 985 | UCEXIK   | 820.36  | 6.33 | 0.52 | 1.46 | 0.24 | triclinic    | Ho     |
| 986 | IPIDUH   | 487.80  | 4.90 | 0.40 | 1.57 | 0.13 | orthorhombic | Ag     |
| 987 | LIXWAR01 | 894.01  | 5.35 | 0.52 | 1.07 | 0.25 | triclinic    | Mn     |
| 988 | ILIFOY   | 370.06  | 5.50 | 0.31 | 1.78 | 0.14 | other        | La     |
| 989 | OBUFEX   | 1069.08 | 5.01 | 0.46 | 1.10 | 0.28 | other        | Zn     |

|      |              |         |       |      |      |      |              |            |
|------|--------------|---------|-------|------|------|------|--------------|------------|
| 990  | EFOTID       | 550.65  | 4.83  | 0.54 | 3.01 | 0.11 | orthorhombic | Mn, Re, Te |
| 991  | CADQOP       | 1763.33 | 6.62  | 0.65 | 1.10 | 0.47 | triclinic    | Ce         |
| 992  | QUSCAJ       | 775.01  | 5.55  | 0.44 | 1.17 | 0.22 | other        | Cd, Li     |
| 993  | OKIVIO       | 456.59  | 4.83  | 0.33 | 1.32 | 0.12 | tetragonal   | Cd         |
| 994  | DIXKOL       | 797.88  | 6.93  | 0.48 | 1.41 | 0.26 | triclinic    | Co         |
| 995  | MUJRIT       | 700.04  | 5.83  | 0.38 | 1.31 | 0.18 | monoclinic   | Cd         |
| 996  | FULQUZ       | 744.66  | 5.72  | 0.49 | 1.52 | 0.21 | orthorhombic | La         |
| 997  | SEHZUB       | 611.29  | 6.07  | 0.37 | 1.15 | 0.20 | triclinic    | Co         |
| 998  | PEJFOA       | 221.29  | 4.40  | 0.45 | 2.21 | 0.06 | orthorhombic | Ga         |
| 999  | LAGWEX_clear | 1001.77 | 6.32  | 0.56 | 1.38 | 0.29 | triclinic    | Cd         |
| 1000 | PIZPOD       | 639.02  | 4.76  | 0.48 | 1.78 | 0.19 | other        | Lu         |
| 1001 | NAYZUK       | 695.41  | 9.26  | 0.53 | 1.33 | 0.22 | other        | In         |
| 1002 | MABKIK01     | 491.25  | 5.51  | 0.29 | 1.39 | 0.16 | triclinic    | Cu         |
| 1003 | PAPXUB       | 157.85  | 3.82  | 0.20 | 1.41 | 0.07 | triclinic    | Cd         |
| 1004 | YAZWOM       | 215.55  | 4.59  | 0.19 | 1.42 | 0.06 | other        | Cu         |
| 1005 | WECJAR       | 344.99  | 4.85  | 0.26 | 1.46 | 0.09 | triclinic    | Zn         |
| 1006 | WENDIE       | 469.66  | 5.25  | 0.42 | 1.41 | 0.17 | triclinic    | Zn         |
| 1007 | VODQIP       | 1520.63 | 7.16  | 0.60 | 1.04 | 0.41 | triclinic    | Nd         |
| 1008 | CIVTEH       | 812.06  | 5.25  | 0.44 | 1.06 | 0.21 | triclinic    | Cu         |
| 1009 | ILIFUE       | 345.90  | 5.45  | 0.30 | 1.81 | 0.13 | other        | Ce         |
| 1010 | TADYEE       | 1108.35 | 6.25  | 0.43 | 1.06 | 0.31 | triclinic    | Mo, Ni     |
| 1011 | DAWBOU       | 517.22  | 4.97  | 0.36 | 1.40 | 0.19 | orthorhombic | Ni         |
| 1012 | ZASJAG       | 939.73  | 8.33  | 0.47 | 1.21 | 0.30 | triclinic    | Cd         |
| 1013 | KEJHIQ       | 566.83  | 4.99  | 0.46 | 1.30 | 0.18 | orthorhombic | Cd         |
| 1014 | WIYZOU       | 1009.99 | 6.31  | 0.50 | 1.33 | 0.28 | other        | Co         |
| 1015 | HUTZAX01     | 213.77  | 4.79  | 0.22 | 1.42 | 0.07 | other        | Zn         |
| 1016 | BUWGEG       | 874.47  | 6.19  | 0.42 | 1.33 | 0.25 | other        | Cu         |
| 1017 | YIWMIA       | 1284.47 | 6.62  | 0.51 | 1.28 | 0.39 | orthorhombic | Cd         |
| 1018 | TEDLUK       | 381.38  | 5.72  | 0.29 | 1.33 | 0.11 | triclinic    | Zn         |
| 1019 | UWELIS       | 1786.28 | 5.90  | 0.67 | 0.95 | 0.47 | other        | Zn         |
| 1020 | PEVPUD       | 3696.94 | 14.96 | 0.84 | 0.59 | 1.30 | triclinic    | Zn         |
| 1021 | GAYGAQ       | 666.71  | 5.38  | 0.51 | 1.32 | 0.26 | triclinic    | Cu         |
| 1022 | RETBEZ       | 471.96  | 5.59  | 0.33 | 1.36 | 0.12 | orthorhombic | Zn         |
| 1023 | XISVUR       | 895.94  | 4.77  | 0.54 | 1.17 | 0.20 | orthorhombic | Zn         |
| 1024 | REZVAU       | 950.80  | 5.00  | 0.48 | 1.10 | 0.24 | other        | Co         |
| 1025 | PACZUQ       | 412.65  | 6.94  | 0.28 | 1.54 | 0.11 | triclinic    | Pr         |
| 1026 | LAGNEO       | 1519.73 | 5.11  | 0.57 | 1.05 | 0.43 | triclinic    | Y          |
| 1027 | MODNOI       | 379.33  | 4.53  | 0.29 | 1.60 | 0.09 | orthorhombic | Cd         |
| 1028 | OFEHAK       | 1044.43 | 6.57  | 0.50 | 1.26 | 0.26 | triclinic    | Cd         |
| 1029 | ZIF-77       | 405.63  | 5.05  | 0.32 | 1.55 | 0.12 | other        | Zn         |
| 1030 | CUVXAT       | 1349.06 | 6.40  | 0.51 | 1.06 | 0.33 | triclinic    | Mn         |
| 1031 | MULQOA       | 1436.54 | 5.70  | 0.58 | 1.29 | 0.38 | other        | Zn         |
| 1032 | TEQPAI       | 890.95  | 5.78  | 0.53 | 1.19 | 0.23 | orthorhombic | Zn         |
| 1033 | LESWAI       | 660.72  | 5.45  | 0.43 | 1.42 | 0.19 | triclinic    | La         |
| 1034 | LADHEF       | 1181.70 | 6.53  | 0.56 | 1.16 | 0.34 | triclinic    | Zn         |

|      |          |         |      |      |      |      |              |        |
|------|----------|---------|------|------|------|------|--------------|--------|
| 1035 | OFESAU   | 374.55  | 7.19 | 0.32 | 1.92 | 0.12 | other        | Cu, Gd |
| 1036 | GEDSEP   | 504.37  | 4.77 | 0.44 | 1.39 | 0.14 | triclinic    | Nd     |
| 1037 | SEFSOM   | 555.25  | 7.84 | 0.32 | 1.31 | 0.18 | triclinic    | Cd     |
| 1038 | SERKEG   | 875.26  | 9.09 | 0.49 | 1.31 | 0.27 | other        | Y      |
| 1039 | QURSEC   | 1103.16 | 6.49 | 0.50 | 1.11 | 0.32 | other        | Pd, Zn |
| 1040 | LUSHIR   | 788.62  | 5.54 | 0.44 | 1.23 | 0.24 | triclinic    | Mn     |
| 1041 | HICVUM   | 932.52  | 5.45 | 0.54 | 1.39 | 0.27 | triclinic    | Cd     |
| 1042 | VUDQOB   | 809.64  | 6.36 | 0.53 | 1.49 | 0.24 | triclinic    | Yb     |
| 1043 | EYOQEP   | 902.97  | 6.74 | 0.48 | 1.15 | 0.24 | orthorhombic | Cd     |
| 1044 | GALCAZ   | 928.05  | 7.28 | 0.46 | 1.17 | 0.27 | other        | Zn     |
| 1045 | REYPIW   | 1052.18 | 5.41 | 0.48 | 1.18 | 0.29 | triclinic    | Zn     |
| 1046 | XOHLEM01 | 1072.21 | 5.30 | 0.59 | 1.34 | 0.31 | other        | Zn     |
| 1047 | BEPVEZ   | 609.40  | 5.87 | 0.31 | 1.27 | 0.18 | triclinic    | Cu     |
| 1048 | SATBEW   | 462.37  | 8.30 | 0.33 | 1.67 | 0.12 | other        | Cu, W  |
| 1049 | HAWYUB   | 638.96  | 5.60 | 0.44 | 1.51 | 0.20 | monoclinic   | Cd     |
| 1050 | PUWCUF   | 1144.54 | 5.64 | 0.58 | 1.21 | 0.27 | orthorhombic | Zn     |
| 1051 | KINKAV   | 209.14  | 4.09 | 0.19 | 1.21 | 0.07 | monoclinic   | Zn     |
| 1052 | ISUCUV   | 892.19  | 5.40 | 0.53 | 1.07 | 0.24 | triclinic    | Fe     |
| 1053 | RAHBUZ   | 1498.47 | 6.52 | 0.61 | 1.14 | 0.43 | orthorhombic | Zn     |
| 1054 | TUTHOG   | 1287.52 | 8.03 | 0.59 | 1.04 | 0.40 | triclinic    | Mn     |
| 1055 | QITYOI   | 707.75  | 5.09 | 0.41 | 1.38 | 0.21 | triclinic    | Pr     |
| 1056 | ECUDIR   | 211.50  | 5.06 | 0.27 | 2.64 | 0.06 | other        | U      |
| 1057 | OKIXIQ01 | 485.49  | 4.99 | 0.38 | 1.21 | 0.12 | tetragonal   | Cd     |
| 1058 | SUNJER   | 907.37  | 4.59 | 0.55 | 1.43 | 0.26 | triclinic    | Yb     |
| 1059 | OXUPUT   | 515.41  | 9.85 | 0.50 | 1.93 | 0.18 | other        | U      |
| 1060 | TARWAK   | 424.90  | 5.78 | 0.26 | 1.61 | 0.13 | triclinic    | Cu     |
| 1061 | RAXYOF   | 404.37  | 4.80 | 0.23 | 1.30 | 0.12 | triclinic    | Mn     |
| 1062 | HEGJUZ   | 987.64  | 6.73 | 0.48 | 1.09 | 0.26 | monoclinic   | Zn     |
| 1063 | CEJBEA   | 420.00  | 7.33 | 0.26 | 1.58 | 0.12 | triclinic    | Dy     |
| 1064 | KINFEU   | 903.73  | 7.64 | 0.58 | 1.46 | 0.27 | triclinic    | Tm     |
| 1065 | JEDJUY   | 698.22  | 5.00 | 0.49 | 1.67 | 0.19 | triclinic    | Gd, K  |
| 1066 | IBARUA   | 351.84  | 7.13 | 0.31 | 1.98 | 0.12 | other        | Cu, Er |
| 1067 | ZISYAD   | 763.04  | 6.03 | 0.48 | 1.29 | 0.25 | triclinic    | Cu     |
| 1068 | LUSJAL   | 384.57  | 4.33 | 0.30 | 1.37 | 0.13 | triclinic    | Mn     |
| 1069 | KIDVIE   | 738.67  | 6.09 | 0.45 | 1.59 | 0.24 | triclinic    | La     |
| 1070 | MIFGEP   | 1284.44 | 5.85 | 0.56 | 1.02 | 0.34 | other        | Cd     |
| 1071 | KOFPEB02 | 431.50  | 7.34 | 0.32 | 1.77 | 0.14 | other        | Cu, La |
| 1072 | FAFDEX   | 356.21  | 4.86 | 0.35 | 1.41 | 0.14 | triclinic    | K, Mn  |
| 1073 | FIJDIM02 | 844.91  | 5.51 | 0.51 | 1.24 | 0.25 | triclinic    | Mn     |
| 1074 | CIGDUT   | 83.47   | 4.90 | 0.38 | 1.74 | 0.02 | triclinic    | Dy     |
| 1075 | WEMNAF   | 395.62  | 4.39 | 0.37 | 1.42 | 0.10 | triclinic    | Zn     |
| 1076 | KOJCUI   | 296.83  | 5.40 | 0.21 | 1.52 | 0.08 | orthorhombic | Mn     |
| 1077 | NOHFOG   | 736.98  | 5.27 | 0.49 | 1.67 | 0.20 | other        | Er     |
| 1078 | DEJRUH   | 937.59  | 4.77 | 0.49 | 1.03 | 0.27 | other        | B, Co  |
| 1079 | EFOTAV   | 1078.06 | 5.19 | 0.57 | 2.19 | 0.23 | orthorhombic | Mn, Re |



|      |            |         |      |      |      |      |              |        |
|------|------------|---------|------|------|------|------|--------------|--------|
| 1080 | UKUBIM     | 1038.00 | 7.25 | 0.52 | 1.09 | 0.29 | tetragonal   | Cd     |
| 1081 | BUWGAC     | 526.24  | 5.84 | 0.30 | 1.44 | 0.17 | other        | Cu     |
| 1082 | OHAKEO     | 891.95  | 5.67 | 0.49 | 1.15 | 0.25 | orthorhombic | Cd     |
| 1083 | XEXLOD     | 1023.76 | 6.86 | 0.50 | 1.18 | 0.31 | other        | Zn     |
| 1084 | WEMDID     | 1301.94 | 5.01 | 0.55 | 1.50 | 0.34 | monoclinic   | Nd     |
| 1085 | OKIWEL     | 449.43  | 4.78 | 0.32 | 1.32 | 0.12 | tetragonal   | Cd     |
| 1086 | IZUMUM     | 794.24  | 5.58 | 0.38 | 1.29 | 0.22 | triclinic    | Cu     |
| 1087 | PIHWAG     | 1020.11 | 8.34 | 0.52 | 1.27 | 0.32 | triclinic    | La     |
| 1088 | HOWPOZ     | 1073.38 | 6.76 | 0.55 | 1.28 | 0.31 | orthorhombic | Cd     |
| 1089 | IJASAO     | 746.82  | 5.83 | 0.44 | 1.22 | 0.21 | triclinic    | Er     |
| 1090 | UWOWAF     | 817.58  | 5.37 | 0.49 | 1.16 | 0.24 | triclinic    | Mn     |
| 1091 | KOFPEB03   | 426.65  | 7.32 | 0.32 | 1.77 | 0.14 | other        | Cu, La |
| 1092 | PAVLUU     | 464.90  | 4.65 | 0.46 | 1.35 | 0.19 | tetragonal   | Ag     |
| 1093 | FALVOF     | 1057.68 | 6.64 | 0.49 | 1.39 | 0.26 | other        | Cu, Pr |
| 1094 | CEHPIP     | 296.36  | 4.99 | 0.29 | 1.36 | 0.11 | triclinic    | Cu     |
| 1095 | ICOWON     | 918.20  | 5.84 | 0.49 | 1.26 | 0.30 | triclinic    | La     |
| 1096 | TARVUD     | 444.74  | 5.50 | 0.28 | 1.58 | 0.13 | triclinic    | Ni     |
| 1097 | MIHLEV     | 457.40  | 5.49 | 0.32 | 1.38 | 0.14 | triclinic    | Pr     |
| 1098 | GIQXIO     | 517.67  | 4.61 | 0.48 | 1.81 | 0.19 | triclinic    | Dy, Ru |
| 1099 | SADLEQ     | 920.26  | 6.91 | 0.61 | 1.51 | 0.30 | tetragonal   | Nd     |
| 1100 | PUQXUV     | 119.19  | 5.34 | 0.28 | 1.50 | 0.04 | other        | Zn     |
| 1101 | FAGREM     | 879.86  | 7.03 | 0.52 | 1.47 | 0.26 | orthorhombic | Zn     |
| 1102 | VIDXOX     | 705.36  | 6.14 | 0.47 | 1.69 | 0.20 | triclinic    | Er     |
| 1103 | MULXOH     | 1129.66 | 5.19 | 0.51 | 1.21 | 0.32 | other        | La     |
| 1104 | BURJOO     | 470.19  | 5.25 | 0.28 | 1.37 | 0.13 | triclinic    | Co     |
| 1105 | TEWFUY     | 445.75  | 4.72 | 0.38 | 1.20 | 0.14 | triclinic    | Cu     |
| 1106 | ESEVIH     | 755.60  | 6.83 | 0.51 | 1.52 | 0.24 | other        | Zn     |
| 1107 | GIQYAH     | 468.78  | 4.52 | 0.48 | 1.85 | 0.17 | triclinic    | Ho, Ru |
| 1108 | RAZGOQ     | 360.50  | 5.17 | 0.32 | 1.62 | 0.10 | triclinic    | Cu     |
| 1109 | XEQRAO     | 480.21  | 5.22 | 0.28 | 1.37 | 0.15 | triclinic    | Cd     |
| 1110 | HIFGOU     | 520.49  | 6.06 | 0.39 | 1.10 | 0.17 | triclinic    | Zn     |
| 1111 | FUNBAS     | 931.39  | 6.41 | 0.46 | 1.11 | 0.25 | other        | Zn     |
| 1112 | OHOLIH     | 927.04  | 5.59 | 0.50 | 1.27 | 0.27 | other        | Zn     |
| 1113 | EYOPUE     | 499.02  | 6.58 | 0.41 | 1.20 | 0.15 | other        | Cd     |
| 1114 | VUQKUO     | 462.10  | 5.42 | 0.31 | 1.30 | 0.11 | other        | Cd     |
| 1115 | EBEXAM     | 918.30  | 6.91 | 0.60 | 1.51 | 0.30 | tetragonal   | Gd     |
| 1116 | ATIBIO     | 400.87  | 4.91 | 0.27 | 1.60 | 0.16 | other        | Mn     |
| 1117 | UKUBOS     | 1059.05 | 7.21 | 0.52 | 1.02 | 0.32 | tetragonal   | Mn     |
| 1118 | QETCUO     | 1149.41 | 6.73 | 0.54 | 1.23 | 0.33 | triclinic    | Gd     |
| 1119 | GIQYEL     | 608.41  | 4.76 | 0.47 | 1.69 | 0.21 | triclinic    | La, Ru |
| 1120 | REGJIW02   | 117.81  | 4.03 | 0.27 | 2.20 | 0.09 | triclinic    | Co     |
| 1121 | UKUPUL     | 876.79  | 7.37 | 0.56 | 1.43 | 0.25 | tetragonal   | Si, V  |
| 1122 | EYUWAW_cle | 1205.29 | 5.89 | 0.51 | 1.02 | 0.30 | orthorhombic | Mn     |
| 1123 | WOCWAN     | 584.14  | 5.81 | 0.32 | 1.37 | 0.18 | triclinic    | Cu     |
| 1124 | ELIKUG     | 520.71  | 5.00 | 0.42 | 1.58 | 0.15 | triclinic    | Gd     |

|      |        |         |      |      |      |      |              |        |
|------|--------|---------|------|------|------|------|--------------|--------|
| 1125 | DEPXIG | 978.67  | 5.32 | 0.51 | 1.21 | 0.26 | other        | Mn     |
| 1126 | TETZID | 452.51  | 5.12 | 0.33 | 1.35 | 0.11 | monoclinic   | Cd     |
| 1127 | MIHMAS | 362.24  | 5.78 | 0.36 | 1.40 | 0.10 | triclinic    | Cu, Dy |
| 1128 | GIQXEK | 577.19  | 4.73 | 0.47 | 1.71 | 0.20 | triclinic    | Ce, Ru |
| 1129 | REFJET | 680.39  | 6.12 | 0.44 | 1.48 | 0.20 | triclinic    | In, K  |
| 1130 | PUQYAC | 118.13  | 5.33 | 0.28 | 1.50 | 0.03 | other        | Zn     |
| 1131 | XUMTUV | 1380.25 | 5.40 | 0.60 | 1.25 | 0.37 | triclinic    | Ho     |
| 1132 | KUNWEW | 359.48  | 5.20 | 0.26 | 1.47 | 0.11 | triclinic    | Zn     |
| 1133 | PAKXIK | 901.16  | 5.42 | 0.48 | 1.25 | 0.25 | triclinic    | Cd     |
| 1134 | KAVGAQ | 1065.58 | 5.30 | 0.47 | 1.16 | 0.29 | triclinic    | Co     |
| 1135 | GIQYIP | 581.71  | 4.65 | 0.49 | 1.74 | 0.20 | triclinic    | Nd, Ru |
| 1136 | IXISAJ | 591.51  | 5.71 | 0.48 | 1.67 | 0.19 | triclinic    | Cu     |
| 1137 | BEZSIK | 1010.40 | 5.28 | 0.61 | 1.76 | 0.26 | other        | Bi     |
| 1138 | PEGCEL | 333.10  | 4.80 | 0.29 | 1.37 | 0.12 | monoclinic   | Zn     |
| 1139 | SEHSOO | 1349.74 | 5.44 | 0.64 | 1.36 | 0.36 | other        | Ho     |
| 1140 | RACZEC | 463.31  | 5.26 | 0.32 | 1.52 | 0.17 | orthorhombic | Co     |
| 1141 | XEHSUZ | 395.14  | 4.86 | 0.29 | 1.39 | 0.16 | other        | Mg     |
| 1142 | ABEYIR | 259.02  | 4.67 | 0.33 | 1.97 | 0.09 | orthorhombic | Gd     |
| 1143 | BEPVID | 483.55  | 5.48 | 0.29 | 1.31 | 0.16 | triclinic    | Cu     |
| 1144 | EKOPOK | 870.99  | 8.04 | 0.54 | 1.24 | 0.29 | triclinic    | Ca, Cd |
| 1145 | CUVGOQ | 1348.01 | 5.51 | 0.57 | 1.00 | 0.38 | triclinic    | Mn     |
| 1146 | SOWYOS | 1333.95 | 5.48 | 0.39 | 0.86 | 0.37 | other        | Rb, Si |
| 1147 | MATTUX | 1165.69 | 6.08 | 0.55 | 1.07 | 0.32 | triclinic    | Zn     |
| 1148 | OKIXIQ | 480.58  | 5.30 | 0.38 | 1.20 | 0.11 | tetragonal   | Cd     |
| 1149 | NADZEZ | 350.65  | 4.49 | 0.40 | 1.63 | 0.13 | triclinic    | Y      |
| 1150 | MAZSUD | 1068.61 | 5.40 | 0.54 | 1.16 | 0.36 | triclinic    | Zn     |
| 1151 | SATCEX | 441.28  | 7.16 | 0.32 | 1.60 | 0.11 | other        | Cu, W  |
| 1152 | ILIGEP | 321.97  | 5.39 | 0.31 | 1.86 | 0.13 | other        | Nd     |
| 1153 | VUQKOI | 676.37  | 6.54 | 0.35 | 1.36 | 0.19 | triclinic    | Cd     |
| 1154 | ALUJIB | 781.95  | 6.01 | 0.48 | 1.43 | 0.20 | triclinic    | Ce     |
| 1155 | YIWLOF | 1391.86 | 6.80 | 0.52 | 1.24 | 0.45 | triclinic    | Cd     |
| 1156 | UBIPAY | 671.19  | 4.50 | 0.39 | 1.21 | 0.19 | triclinic    | Mn     |
| 1157 | ZEZPUR | 1085.39 | 6.75 | 0.54 | 1.26 | 0.33 | triclinic    | Dy     |
| 1158 | BAHMAZ | 268.59  | 5.07 | 0.34 | 1.45 | 0.08 | other        | Ag     |
| 1159 | IKETOI | 766.63  | 5.24 | 0.48 | 1.66 | 0.23 | triclinic    | Gd     |
| 1160 | LAGNUE | 755.10  | 5.28 | 0.49 | 1.30 | 0.23 | other        | Y      |
| 1161 | XUNHAQ | 832.20  | 4.23 | 0.42 | 1.01 | 0.28 | other        | Li     |
| 1162 | QATHOK | 889.76  | 9.30 | 0.44 | 1.22 | 0.27 | triclinic    | Cd     |
| 1163 | XINHOT | 361.03  | 5.47 | 0.29 | 1.54 | 0.12 | triclinic    | La     |
| 1164 | ELILAN | 479.03  | 4.98 | 0.42 | 1.61 | 0.15 | triclinic    | Dy     |
| 1165 | REJLEY | 1042.47 | 5.22 | 0.47 | 1.17 | 0.28 | triclinic    | Co     |
| 1166 | YUVSUE | 877.13  | 5.77 | 0.40 | 1.23 | 0.20 | tetragonal   | Co     |
| 1167 | KULRIT | 947.33  | 5.77 | 0.58 | 1.47 | 0.28 | other        | Yb     |
| 1168 | ABIYIV | 267.70  | 4.38 | 0.20 | 1.35 | 0.08 | orthorhombic | Co     |
| 1169 | OLUCAZ | 700.10  | 5.88 | 0.33 | 1.16 | 0.20 | orthorhombic | Cu     |

|      |          |         |       |      |      |      |              |            |
|------|----------|---------|-------|------|------|------|--------------|------------|
| 1170 | GIMSIG   | 927.44  | 8.87  | 0.56 | 1.45 | 0.30 | triclinic    | Cd         |
| 1171 | UKUCAF   | 1000.77 | 7.21  | 0.52 | 1.06 | 0.29 | tetragonal   | Co         |
| 1172 | ICORAV   | 387.32  | 4.68  | 0.32 | 1.76 | 0.13 | other        | La         |
| 1173 | XEGKIF   | 277.94  | 5.08  | 0.40 | 1.33 | 0.07 | triclinic    | Gd         |
| 1174 | SODZIV   | 769.33  | 6.33  | 0.39 | 1.27 | 0.19 | orthorhombic | Cd         |
| 1175 | AMAFOK   | 530.51  | 6.58  | 0.37 | 1.49 | 0.17 | triclinic    | Cu         |
| 1176 | DAWBUA   | 597.21  | 5.76  | 0.38 | 1.34 | 0.19 | orthorhombic | Co         |
| 1177 | PAPRUU   | 382.37  | 7.39  | 0.30 | 1.81 | 0.13 | other        | La, Ni     |
| 1178 | PEFRID01 | 840.20  | 6.56  | 0.53 | 1.32 | 0.22 | other        | Sm         |
| 1179 | COWMIL   | 1515.55 | 6.88  | 0.63 | 1.24 | 0.43 | monoclinic   | Ho         |
| 1180 | QEBGAH   | 901.23  | 5.67  | 0.47 | 1.08 | 0.25 | other        | Co         |
| 1181 | GAXQIH   | 445.05  | 5.17  | 0.27 | 1.37 | 0.12 | triclinic    | Ni         |
| 1182 | AJAYIT   | 351.46  | 7.13  | 0.31 | 1.98 | 0.11 | other        | Cu, Er     |
| 1183 | CETFUD   | 604.68  | 4.79  | 0.39 | 1.43 | 0.18 | triclinic    | Pr         |
| 1184 | HICVOG   | 672.42  | 4.78  | 0.52 | 1.26 | 0.22 | tetragonal   | Zn         |
| 1185 | OPIPOT   | 374.36  | 4.83  | 0.31 | 1.41 | 0.11 | other        | Co         |
| 1186 | HEXNII   | 269.94  | 4.91  | 0.27 | 1.57 | 0.11 | triclinic    | Cd         |
| 1187 | ASACON   | 462.03  | 5.98  | 0.36 | 1.78 | 0.14 | orthorhombic | Zn         |
| 1188 | YEMJAC   | 863.29  | 6.61  | 0.60 | 1.59 | 0.28 | tetragonal   | Dy         |
| 1189 | ITIWUE   | 463.64  | 5.13  | 0.38 | 1.21 | 0.13 | tetragonal   | Cd         |
| 1190 | CAYBAH01 | 298.21  | 5.46  | 0.26 | 1.50 | 0.08 | cubic        | Cu         |
| 1191 | FIJDIM04 | 863.03  | 5.53  | 0.51 | 1.23 | 0.26 | triclinic    | Mn         |
| 1192 | DUXMAL   | 668.53  | 4.49  | 0.49 | 1.16 | 0.14 | orthorhombic | Mn         |
| 1193 | ALIXUP   | 805.59  | 5.95  | 0.37 | 1.34 | 0.21 | orthorhombic | Cu         |
| 1194 | PEFRUP01 | 898.64  | 6.72  | 0.53 | 1.32 | 0.23 | other        | Gd         |
| 1195 | AVIMOI   | 697.09  | 5.22  | 0.45 | 1.23 | 0.21 | other        | Zn         |
| 1196 | LAWGOG   | 3740.58 | 15.11 | 0.83 | 0.59 | 1.27 | triclinic    | Zn         |
| 1197 | HIHJUF   | 395.40  | 5.82  | 0.37 | 1.48 | 0.13 | other        | Zn         |
| 1198 | QUPHUF   | 359.71  | 4.96  | 0.28 | 1.28 | 0.11 | triclinic    | Zn         |
| 1199 | HAMRIY   | 354.89  | 7.13  | 0.32 | 1.97 | 0.12 | other        | Cu, Ho     |
| 1200 | ABEXOW   | 334.94  | 4.69  | 0.35 | 1.81 | 0.10 | orthorhombic | Pr         |
| 1201 | FATLUJ   | 764.61  | 5.51  | 0.36 | 1.21 | 0.21 | triclinic    | Cu         |
| 1202 | OKIYAJ   | 402.24  | 4.63  | 0.29 | 1.34 | 0.10 | tetragonal   | Cd         |
| 1203 | LIXWAR   | 896.59  | 5.40  | 0.53 | 1.06 | 0.26 | triclinic    | Mn         |
| 1204 | OVIZID   | 502.01  | 5.41  | 0.35 | 1.26 | 0.17 | other        | Ni         |
| 1205 | OVICUS   | 450.72  | 5.92  | 0.35 | 1.53 | 0.14 | triclinic    | Zn         |
| 1206 | TEJLOL   | 1263.37 | 6.49  | 0.55 | 1.26 | 0.33 | other        | Cd         |
| 1207 | CAYDOX06 | 388.77  | 4.86  | 0.24 | 1.47 | 0.11 | other        | Cu         |
| 1208 | OCACUR   | 1102.48 | 5.39  | 0.61 | 1.25 | 0.35 | triclinic    | Co         |
| 1209 | JITPOS   | 585.09  | 5.87  | 0.36 | 1.44 | 0.14 | orthorhombic | Zn         |
| 1210 | KEJBOQ   | 544.47  | 4.93  | 0.45 | 1.31 | 0.17 | orthorhombic | Cd         |
| 1211 | DEPXAY   | 1405.42 | 5.18  | 0.61 | 1.07 | 0.31 | orthorhombic | Zn         |
| 1212 | LETROT   | 446.84  | 5.01  | 0.39 | 1.67 | 0.16 | triclinic    | Zn         |
| 1213 | EPEWAY01 | 744.91  | 5.72  | 0.40 | 1.28 | 0.21 | tetragonal   | Co         |
| 1214 | RUCGOM   | 204.15  | 4.31  | 0.31 | 2.16 | 0.06 | other        | Au, Pt, Zn |

|      |          |         |       |      |      |      |              |        |
|------|----------|---------|-------|------|------|------|--------------|--------|
| 1215 | SIQQEO   | 1469.49 | 4.99  | 0.51 | 1.02 | 0.41 | triclinic    | Sr     |
| 1216 | ABEYAJ   | 298.95  | 4.70  | 0.34 | 1.91 | 0.09 | orthorhombic | Sm     |
| 1217 | LAGNAK   | 1549.10 | 5.44  | 0.57 | 1.02 | 0.43 | triclinic    | Y      |
| 1218 | SATCAT   | 461.75  | 8.12  | 0.34 | 1.75 | 0.12 | other        | Cu, W  |
| 1219 | FUWXOL   | 617.57  | 4.68  | 0.48 | 1.49 | 0.20 | orthorhombic | Zn     |
| 1220 | RACZIG   | 461.49  | 5.27  | 0.33 | 1.54 | 0.16 | orthorhombic | Zn     |
| 1221 | WOJJOV   | 654.46  | 7.81  | 0.51 | 1.16 | 0.20 | other        | Al     |
| 1222 | YEZFIU   | 1125.51 | 7.76  | 0.47 | 1.16 | 0.31 | triclinic    | Zn     |
| 1223 | QOCBEQ   | 1193.93 | 7.46  | 0.50 | 0.97 | 0.31 | other        | Ni     |
| 1224 | COXXIX   | 390.74  | 4.83  | 0.32 | 1.44 | 0.11 | monoclinic   | Mn, Mo |
| 1225 | PIJROR   | 994.37  | 8.34  | 0.52 | 1.28 | 0.30 | triclinic    | Ce     |
| 1226 | BEXTUV   | 621.12  | 4.66  | 0.48 | 1.31 | 0.16 | triclinic    | Mn     |
| 1227 | OKIYIR03 | 432.80  | 4.65  | 0.31 | 1.33 | 0.10 | tetragonal   | Cd     |
| 1228 | KINHAS   | 338.63  | 4.56  | 0.27 | 1.30 | 0.11 | other        | Zn     |
| 1229 | EVURAP   | 474.25  | 5.08  | 0.41 | 1.50 | 0.16 | triclinic    | Ce     |
| 1230 | QEDZEG   | 278.62  | 4.82  | 0.40 | 1.27 | 0.08 | other        | Zn     |
| 1231 | UNIGEE   | 3594.06 | 14.93 | 0.83 | 0.61 | 1.23 | triclinic    | Zn     |
| 1232 | QATPUX   | 181.91  | 4.16  | 0.31 | 2.19 | 0.11 | triclinic    | Co     |
| 1233 | AJAYIT   | 530.84  | 7.13  | 0.34 | 1.44 | 0.17 | triclinic    | Cu     |
| 1234 | YUKBIP01 | 343.99  | 5.80  | 0.24 | 1.54 | 0.11 | other        | Al     |
| 1235 | KUDLUR   | 372.07  | 7.15  | 0.31 | 1.95 | 0.12 | other        | Cu, Dy |
| 1236 | MIBQAR   | 3709.23 | 15.11 | 0.83 | 0.59 | 1.28 | triclinic    | Zn     |
| 1237 | PEVQOY   | 3583.53 | 14.81 | 0.83 | 0.61 | 1.21 | rhombohedral | Zn     |
| 1238 | ALUJOH   | 817.98  | 6.09  | 0.50 | 1.42 | 0.20 | triclinic    | Nd     |
| 1239 | CAYDIR   | 339.79  | 4.79  | 0.23 | 1.50 | 0.11 | other        | Cu     |
| 1240 | LUMDEC   | 889.80  | 7.82  | 0.41 | 1.29 | 0.25 | triclinic    | Cd     |
| 1241 | GIYTAK   | 1714.14 | 5.41  | 0.61 | 1.11 | 0.44 | triclinic    | Cd     |
| 1242 | FIJDIM06 | 887.50  | 5.55  | 0.51 | 1.23 | 0.27 | triclinic    | Mn     |
| 1243 | CAYGIU   | 357.86  | 4.84  | 0.24 | 1.49 | 0.11 | other        | Cu     |
| 1244 | AGARUW   | 635.61  | 6.50  | 0.45 | 1.77 | 0.19 | orthorhombic | La     |
| 1245 | XUMVAD   | 1376.97 | 5.40  | 0.59 | 1.24 | 0.36 | triclinic    | Dy     |
| 1246 | XOVPON   | 896.35  | 5.78  | 0.49 | 1.29 | 0.28 | triclinic    | Ce     |
| 1247 | ELIJOZ   | 604.72  | 5.07  | 0.42 | 1.48 | 0.18 | triclinic    | Ce     |
| 1248 | WEMXIX   | 294.13  | 6.24  | 0.24 | 1.51 | 0.08 | other        | Cu     |
| 1249 | GIQYOV   | 675.39  | 4.31  | 0.43 | 1.69 | 0.20 | triclinic    | Pr, Ru |
| 1250 | PASNA01  | 602.43  | 4.61  | 0.45 | 1.46 | 0.16 | other        | Co     |
| 1251 | OCAQOY   | 203.40  | 4.48  | 0.23 | 1.61 | 0.05 | triclinic    | Ni, V  |
| 1252 | FIJDIM11 | 841.39  | 5.51  | 0.50 | 1.23 | 0.26 | triclinic    | Mn     |
| 1253 | LAWGEW   | 3728.23 | 15.09 | 0.83 | 0.59 | 1.27 | triclinic    | Zn     |
| 1254 | KAYBUJ   | 966.47  | 5.47  | 0.56 | 1.19 | 0.30 | other        | Ca     |
| 1255 | XIHSEN   | 912.73  | 5.41  | 0.54 | 1.09 | 0.26 | triclinic    | Co     |
| 1256 | SAHYOQ03 | 3688.14 | 15.09 | 0.82 | 0.59 | 1.25 | triclinic    | Zn     |
| 1257 | PIHJOH   | 335.61  | 5.31  | 0.24 | 1.26 | 0.12 | triclinic    | Mn     |
| 1258 | JIVHIG   | 655.96  | 5.93  | 0.32 | 1.00 | 0.17 | monoclinic   | K      |
| 1259 | FATKAO   | 282.69  | 4.22  | 0.31 | 1.95 | 0.09 | monoclinic   | Gd     |

|      |          |         |       |      |      |      |              |        |
|------|----------|---------|-------|------|------|------|--------------|--------|
| 1260 | CAVSUP   | 645.18  | 5.94  | 0.35 | 1.38 | 0.19 | other        | La     |
| 1261 | GAYFUJ   | 1149.86 | 5.51  | 0.63 | 1.30 | 0.34 | other        | Cd     |
| 1262 | GIQXUA   | 533.04  | 4.61  | 0.48 | 1.79 | 0.19 | triclinic    | Gd, Ru |
| 1263 | NIJZOV   | 651.00  | 8.64  | 0.37 | 1.54 | 0.20 | other        | Cu, Er |
| 1264 | XEHSEJ   | 484.18  | 4.93  | 0.31 | 1.33 | 0.20 | other        | Mg     |
| 1265 | ANENEN   | 526.09  | 6.10  | 0.32 | 1.32 | 0.15 | triclinic    | La     |
| 1266 | DEGIK    | 224.17  | 4.07  | 0.28 | 1.59 | 0.12 | other        | Cu     |
| 1267 | GIQXOU   | 466.25  | 4.53  | 0.48 | 1.86 | 0.17 | triclinic    | Er, Ru |
| 1268 | ACUBAB   | 428.18  | 6.48  | 0.37 | 2.31 | 0.13 | other        | Zn     |
| 1269 | FIJDIM03 | 850.59  | 5.51  | 0.51 | 1.24 | 0.26 | triclinic    | Mn     |
| 1270 | UKUBUY   | 1044.12 | 7.25  | 0.52 | 1.03 | 0.30 | tetragonal   | Fe     |
| 1271 | PASTOU   | 408.88  | 6.35  | 0.30 | 1.59 | 0.13 | triclinic    | Cd     |
| 1272 | IBITUK   | 585.95  | 4.93  | 0.33 | 1.18 | 0.18 | triclinic    | Cu     |
| 1273 | SAHYOQ04 | 3721.00 | 15.11 | 0.82 | 0.59 | 1.26 | triclinic    | Zn     |
| 1274 | TIRRIW   | 1135.32 | 5.38  | 0.54 | 1.07 | 0.31 | triclinic    | Co     |
| 1275 | PEVQEO   | 3587.12 | 14.87 | 0.84 | 0.61 | 1.23 | triclinic    | Zn     |
| 1276 | PIXHOV   | 743.05  | 4.85  | 0.40 | 1.13 | 0.21 | other        | Zn     |
| 1277 | XIHSEN01 | 870.08  | 5.41  | 0.53 | 1.08 | 0.25 | triclinic    | Co     |
| 1278 | QUDJOP   | 1432.30 | 5.72  | 0.60 | 1.06 | 0.41 | other        | Zn     |
| 1279 | MADWAQ   | 329.62  | 5.47  | 0.24 | 1.52 | 0.11 | orthorhombic | Cu     |
| 1280 | QUTTII   | 877.48  | 5.87  | 0.52 | 1.54 | 0.24 | other        | Co     |
| 1281 | JUTCUW   | 2256.28 | 6.94  | 0.65 | 1.06 | 0.65 | triclinic    | Cd     |
| 1282 | JIVFUQ   | 1271.91 | 6.41  | 0.58 | 1.15 | 0.37 | triclinic    | Zn     |
| 1283 | WIFBAQ   | 589.24  | 6.35  | 0.36 | 1.27 | 0.16 | triclinic    | Cd     |
| 1284 | CEDFIC   | 1368.70 | 5.28  | 0.59 | 1.21 | 0.37 | triclinic    | Gd     |
| 1285 | ESEQUO   | 673.65  | 5.34  | 0.44 | 1.17 | 0.22 | triclinic    | Co     |
| 1286 | GEDSOZ   | 1848.62 | 5.84  | 0.65 | 1.11 | 0.44 | triclinic    | Nd     |
| 1287 | BEPVOJ01 | 462.94  | 5.40  | 0.27 | 1.33 | 0.14 | triclinic    | Cu     |
| 1288 | YICREI   | 673.18  | 5.77  | 0.58 | 1.84 | 0.20 | other        | Pb     |
| 1289 | UKAQIH   | 1236.50 | 7.01  | 0.60 | 1.17 | 0.37 | triclinic    | Gd     |
| 1290 | QIRYAS   | 765.10  | 6.70  | 0.47 | 1.44 | 0.25 | triclinic    | Co     |
| 1291 | REGJIW   | 134.86  | 4.10  | 0.29 | 2.19 | 0.10 | triclinic    | Co     |
| 1292 | OKIVIO02 | 448.30  | 4.79  | 0.32 | 1.33 | 0.12 | tetragonal   | Cd     |
| 1293 | MADVUJ   | 309.90  | 5.27  | 0.25 | 1.66 | 0.10 | orthorhombic | Cu     |
| 1294 | ZARZAV   | 518.33  | 5.15  | 0.36 | 1.32 | 0.16 | monoclinic   | Zn     |
| 1295 | KESGAS   | 810.25  | 5.36  | 0.40 | 1.13 | 0.24 | other        | Mn     |
| 1296 | SUNJOB01 | 963.79  | 4.69  | 0.54 | 1.37 | 0.29 | triclinic    | Ho     |
| 1297 | VUSKAW   | 3676.53 | 14.98 | 0.83 | 0.59 | 1.26 | triclinic    | Zn     |
| 1298 | YIWLEV   | 1448.14 | 6.84  | 0.53 | 1.22 | 0.47 | triclinic    | Cd     |
| 1299 | XUNGUJ   | 751.11  | 4.32  | 0.41 | 1.04 | 0.27 | other        | Li     |
| 1300 | ITIWoy   | 472.22  | 5.41  | 0.37 | 1.22 | 0.12 | tetragonal   | Cd     |
| 1301 | EBEWIT   | 895.17  | 6.77  | 0.60 | 1.55 | 0.29 | tetragonal   | Gd     |
| 1302 | WOHSIV   | 134.32  | 4.98  | 0.13 | 1.45 | 0.05 | orthorhombic | Cu, Na |
| 1303 | QEVKOS   | 264.80  | 4.71  | 0.28 | 1.87 | 0.09 | triclinic    | Cu, W  |
| 1304 | KOJZAL   | 678.33  | 5.25  | 0.43 | 1.13 | 0.21 | triclinic    | Cu     |

|      |          |         |       |      |      |      |              |        |
|------|----------|---------|-------|------|------|------|--------------|--------|
| 1305 | PUMNIV   | 691.71  | 5.60  | 0.45 | 1.67 | 0.20 | monoclinic   | Cd, Hg |
| 1306 | VUSJUP   | 4107.43 | 14.82 | 0.83 | 0.52 | 1.55 | triclinic    | Zn     |
| 1307 | REDYEG   | 516.74  | 6.00  | 0.36 | 1.72 | 0.17 | triclinic    | Zn     |
| 1308 | WENKEH   | 287.74  | 7.48  | 0.24 | 1.50 | 0.09 | triclinic    | Pr     |
| 1309 | TEQTAM   | 819.92  | 7.32  | 0.44 | 1.26 | 0.24 | other        | Cd     |
| 1310 | VEQBID   | 798.59  | 6.36  | 0.39 | 1.46 | 0.19 | other        | Ni     |
| 1311 | GUPBEZ   | 144.88  | 7.29  | 0.20 | 2.54 | 0.05 | other        | Cu     |
| 1312 | KAYCIY   | 1741.72 | 5.93  | 0.63 | 0.98 | 0.47 | triclinic    | Ca     |
| 1313 | METYIU   | 845.63  | 7.46  | 0.40 | 1.31 | 0.23 | triclinic    | Cd     |
| 1314 | OKITIM01 | 446.46  | 4.83  | 0.32 | 1.33 | 0.12 | tetragonal   | Cd     |
| 1315 | PASNAA   | 646.58  | 4.69  | 0.46 | 1.45 | 0.17 | other        | Co     |
| 1316 | TESHAB   | 362.31  | 5.02  | 0.30 | 1.81 | 0.14 | other        | Zn     |
| 1317 | MAPFIS   | 1102.49 | 5.68  | 0.50 | 1.07 | 0.31 | other        | Ti     |
| 1318 | JILXOS   | 208.44  | 4.09  | 0.21 | 1.57 | 0.06 | orthorhombic | Cu     |
| 1319 | OKIYIR   | 434.37  | 4.66  | 0.31 | 1.33 | 0.10 | tetragonal   | Cd     |
| 1320 | WABTOK   | 518.48  | 4.77  | 0.37 | 1.78 | 0.18 | triclinic    | Cd     |
| 1321 | MOTMAK   | 1160.64 | 5.53  | 0.56 | 1.00 | 0.37 | other        | Li     |
| 1322 | WUNVIL   | 447.81  | 4.64  | 0.36 | 1.22 | 0.11 | tetragonal   | Cd     |
| 1323 | YARKEJ   | 455.58  | 5.25  | 0.33 | 1.22 | 0.15 | triclinic    | Zn     |
| 1324 | EYOQAL   | 504.97  | 6.17  | 0.42 | 1.14 | 0.16 | other        | Co     |
| 1325 | OSIXIY   | 103.36  | 4.67  | 0.17 | 1.99 | 0.04 | other        | Ag     |
| 1326 | LAWGUM   | 3741.52 | 15.11 | 0.83 | 0.59 | 1.27 | triclinic    | Zn     |
| 1327 | CUTKOS   | 543.72  | 5.52  | 0.38 | 1.19 | 0.16 | other        | Zn     |
| 1328 | REGJIW01 | 155.08  | 4.08  | 0.29 | 2.20 | 0.09 | triclinic    | Co     |
| 1329 | OFODET   | 1011.55 | 6.10  | 0.47 | 1.15 | 0.27 | other        | Mn     |
| 1330 | WENLAE   | 330.40  | 7.22  | 0.27 | 1.59 | 0.11 | triclinic    | Dy     |
| 1331 | IVEGEV   | 490.71  | 5.57  | 0.31 | 1.36 | 0.15 | triclinic    | Cu     |
| 1332 | NEVQAH   | 402.90  | 5.98  | 0.29 | 1.82 | 0.11 | other        | Cu     |
| 1333 | UCEXEG   | 811.00  | 6.32  | 0.52 | 1.46 | 0.24 | triclinic    | Dy     |
| 1334 | CAZGIT   | 199.10  | 4.75  | 0.25 | 1.75 | 0.07 | monoclinic   | Cu, Mo |
| 1335 | IXISOX   | 472.00  | 5.57  | 0.46 | 1.93 | 0.15 | triclinic    | Cu     |
| 1336 | OSIWOD01 | 129.43  | 4.73  | 0.18 | 1.98 | 0.06 | other        | Ag     |
| 1337 | MIBQAR18 | 3674.05 | 15.01 | 0.84 | 0.60 | 1.27 | triclinic    | Zn     |
| 1338 | GUYLUI01 | 236.01  | 4.54  | 0.22 | 1.52 | 0.06 | triclinic    | Zn     |
| 1339 | KESHAT   | 387.05  | 4.88  | 0.33 | 1.79 | 0.11 | monoclinic   | Pr     |
| 1340 | GIYSIR   | 525.64  | 5.52  | 0.33 | 1.47 | 0.16 | monoclinic   | Cu, Mo |
| 1341 | KIPJIE   | 562.38  | 6.84  | 0.34 | 1.65 | 0.13 | other        | Ce     |
| 1342 | RONZID   | 2305.86 | 6.46  | 0.63 | 1.11 | 0.61 | tetragonal   | Cd     |
| 1343 | RESQAJ   | 235.86  | 5.28  | 0.22 | 1.52 | 0.08 | triclinic    | Cd     |
| 1344 | PESTUD   | 199.88  | 4.62  | 0.28 | 1.52 | 0.09 | orthorhombic | Ni     |
| 1345 | EBEMOO   | 238.14  | 4.88  | 0.23 | 1.59 | 0.08 | other        | Cd     |
| 1346 | LASWEJ   | 1435.53 | 7.36  | 0.56 | 1.05 | 0.39 | triclinic    | Co     |
| 1347 | EWESIJ   | 465.36  | 8.41  | 0.34 | 1.73 | 0.12 | other        | Cu, W  |
| 1348 | SAHYIL   | 443.69  | 4.71  | 0.36 | 1.21 | 0.11 | tetragonal   | Cd     |
| 1349 | BEYSEF   | 1025.69 | 5.62  | 0.41 | 1.18 | 0.26 | triclinic    | Co     |

|      |          |         |       |      |      |      |              |               |
|------|----------|---------|-------|------|------|------|--------------|---------------|
| 1350 | ABEXUC   | 315.16  | 4.67  | 0.35 | 1.85 | 0.10 | orthorhombic | Nd            |
| 1351 | NEYBEZ   | 320.79  | 4.36  | 0.37 | 1.54 | 0.15 | other        | Co            |
| 1352 | NUVWEH   | 634.95  | 6.18  | 0.35 | 1.50 | 0.17 | triclinic    | La            |
| 1353 | OKITIM02 | 458.35  | 4.87  | 0.32 | 1.33 | 0.12 | tetragonal   | Cd            |
| 1354 | GOJDOZ   | 224.00  | 4.72  | 0.42 | 2.79 | 0.06 | triclinic    | U             |
| 1355 | HIFTOG01 | 3721.87 | 15.05 | 0.83 | 0.58 | 1.28 | triclinic    | Zn            |
| 1356 | CEBDOD   | 295.29  | 5.95  | 0.31 | 2.40 | 0.09 | triclinic    | Ba            |
| 1357 | OSIXEU   | 115.24  | 4.87  | 0.17 | 1.97 | 0.06 | triclinic    | Ag            |
| 1358 | FUTZOK   | 509.33  | 4.62  | 0.43 | 1.64 | 0.16 | triclinic    | Gd            |
| 1359 | OPIWEQ   | 193.17  | 4.31  | 0.28 | 1.50 | 0.10 | orthorhombic | Co            |
| 1360 | EDUSIF   | 3634.99 | 15.07 | 0.83 | 0.59 | 1.27 | triclinic    | Zn            |
| 1361 | UGUGUZ   | 258.90  | 4.77  | 0.43 | 1.80 | 0.07 | other        | Yb            |
| 1362 | DEQVIF   | 1088.12 | 6.43  | 0.49 | 1.10 | 0.30 | other        | Mn            |
| 1363 | IKETEV   | 792.14  | 5.50  | 0.48 | 1.62 | 0.24 | triclinic    | Sm            |
| 1364 | SUNJOB   | 965.63  | 4.68  | 0.53 | 1.38 | 0.28 | triclinic    | Ho            |
| 1365 | HEBJAB   | 455.02  | 4.49  | 0.23 | 1.19 | 0.12 | triclinic    | Co            |
| 1366 | LEVNOQ01 | 988.75  | 5.71  | 0.53 | 0.98 | 0.29 | triclinic    | Mg            |
| 1367 | NARTIL   | 368.47  | 4.56  | 0.33 | 1.15 | 0.14 | triclinic    | Co            |
| 1368 | ECEZAO   | 591.74  | 4.79  | 0.41 | 1.43 | 0.18 | triclinic    | Ni            |
| 1369 | KIPZEQ   | 621.42  | 4.76  | 0.40 | 1.27 | 0.19 | triclinic    | Co            |
| 1370 | NICJOA   | 128.00  | 5.24  | 0.14 | 2.06 | 0.04 | triclinic    | Ba, Cu        |
| 1371 | JIYXUL   | 377.03  | 6.30  | 0.37 | 2.75 | 0.10 | triclinic    | Fe, Na, Sb, W |
| 1372 | CADPII   | 107.88  | 5.85  | 0.13 | 2.04 | 0.04 | triclinic    | Zn            |
| 1373 | PIYZAZ   | 2343.46 | 7.01  | 0.65 | 1.04 | 0.67 | triclinic    | Cd            |
| 1374 | PEPKUR   | 218.76  | 4.64  | 0.29 | 1.51 | 0.09 | orthorhombic | Ni            |
| 1375 | BUVYEX   | 559.19  | 7.01  | 0.28 | 1.21 | 0.15 | triclinic    | Fe            |
| 1376 | OWETIU   | 243.40  | 6.91  | 0.33 | 3.32 | 0.06 | triclinic    | Ag, W         |
| 1377 | WUNTAB   | 419.00  | 5.05  | 0.35 | 1.21 | 0.10 | tetragonal   | Cd            |
| 1378 | KIPKEB   | 322.70  | 7.32  | 0.24 | 1.56 | 0.10 | triclinic    | Y             |
| 1379 | LOWPUI   | 787.71  | 5.82  | 0.51 | 1.29 | 0.28 | triclinic    | Zn            |
| 1380 | XILDUT   | 890.92  | 5.19  | 0.41 | 1.33 | 0.23 | triclinic    | Na, Zn        |
| 1381 | VEDVUW   | 639.42  | 5.24  | 0.42 | 1.28 | 0.21 | triclinic    | Ag            |
| 1382 | OJIWIO   | 423.69  | 5.03  | 0.31 | 1.33 | 0.10 | other        | Zn            |
| 1383 | VAHPUR   | 594.83  | 5.91  | 0.34 | 1.30 | 0.15 | triclinic    | Cu, Dy        |
| 1384 | YAZFOW   | 1133.68 | 7.40  | 0.71 | 1.31 | 0.35 | triclinic    | In            |
| 1385 | RIFQUT   | 492.09  | 5.62  | 0.38 | 1.93 | 0.12 | triclinic    | Co            |
| 1386 | ODOXEK   | 109.89  | 5.59  | 0.28 | 1.87 | 0.04 | other        | Cd            |
| 1387 | LUFNEG   | 1001.10 | 4.86  | 0.52 | 1.17 | 0.23 | monoclinic   | Mn            |
| 1388 | UXABUR   | 229.63  | 5.25  | 0.12 | 1.46 | 0.07 | triclinic    | Y             |
| 1389 | KAVTUY   | 244.95  | 5.15  | 0.22 | 2.07 | 0.08 | other        | Cu            |
| 1390 | GIRDUI   | 215.21  | 4.32  | 0.23 | 1.33 | 0.08 | other        | Co            |
| 1391 | GUXPOF   | 663.33  | 5.82  | 0.29 | 1.20 | 0.18 | triclinic    | Co            |
| 1392 | OFORUX   | 284.59  | 6.11  | 0.23 | 1.56 | 0.09 | triclinic    | Cd, Cu        |
| 1393 | PEVQAK   | 3659.56 | 14.87 | 0.83 | 0.60 | 1.27 | triclinic    | Zn            |
| 1394 | RONCIG   | 712.54  | 9.10  | 0.40 | 1.45 | 0.22 | other        | Cu, Gd        |

|      |          |         |       |      |      |      |              |        |
|------|----------|---------|-------|------|------|------|--------------|--------|
| 1395 | BARZUR   | 1330.85 | 5.49  | 0.60 | 0.93 | 0.37 | other        | Zn     |
| 1396 | JUCXEK   | 492.17  | 7.07  | 0.44 | 2.58 | 0.15 | other        | Np     |
| 1397 | KIPKAX   | 268.20  | 7.38  | 0.24 | 1.86 | 0.08 | triclinic    | Yb     |
| 1398 | BEPVOJ   | 426.73  | 4.63  | 0.25 | 1.35 | 0.13 | triclinic    | Cu     |
| 1399 | XADGAM   | 340.36  | 4.91  | 0.38 | 1.20 | 0.11 | monoclinic   | Zn     |
| 1400 | MIMVEJ   | 467.59  | 4.59  | 0.47 | 1.30 | 0.20 | triclinic    | Zn     |
| 1401 | MASZUD   | 610.21  | 6.35  | 0.41 | 1.47 | 0.17 | triclinic    | Cu, Mo |
| 1402 | CAYDEN   | 335.26  | 4.73  | 0.23 | 1.51 | 0.11 | other        | Cu     |
| 1403 | IRMOF-1  | 3646.11 | 15.07 | 0.83 | 0.59 | 1.27 | rhombohedral | Zn     |
| 1404 | OSIWUJ   | 153.10  | 4.87  | 0.18 | 1.96 | 0.06 | triclinic    | Ag     |
| 1405 | TONBII   | 265.47  | 4.58  | 0.25 | 1.61 | 0.10 | triclinic    | Fe     |
| 1406 | QUFTAM   | 375.17  | 4.93  | 0.36 | 1.57 | 0.13 | triclinic    | Cu, Na |
| 1407 | NOCKUM   | 1001.47 | 5.81  | 0.51 | 1.07 | 0.31 | triclinic    | Ca     |
| 1408 | TIRLIQ   | 435.97  | 4.90  | 0.31 | 1.35 | 0.12 | other        | Zn     |
| 1409 | XEDPIH   | 324.63  | 4.57  | 0.31 | 1.79 | 0.11 | other        | Zn     |
| 1410 | VURYOX   | 715.07  | 6.69  | 0.34 | 1.34 | 0.22 | other        | Cu     |
| 1411 | TEJGIA   | 314.00  | 4.29  | 0.31 | 1.88 | 0.09 | monoclinic   | Sm     |
| 1412 | OKIVIO01 | 451.82  | 4.77  | 0.32 | 1.32 | 0.12 | tetragonal   | Cd     |
| 1413 | TACPAP   | 325.43  | 6.29  | 0.25 | 1.71 | 0.10 | other        | Zn     |
| 1414 | LELMIA01 | 749.14  | 5.77  | 0.51 | 1.48 | 0.23 | other        | Sr     |
| 1415 | VIFBOD   | 591.51  | 5.76  | 0.48 | 1.76 | 0.19 | triclinic    | Tm     |
| 1416 | EMIVAY   | 432.41  | 5.17  | 0.39 | 1.17 | 0.10 | orthorhombic | Zn     |
| 1417 | REFTON   | 382.80  | 6.43  | 0.26 | 1.61 | 0.11 | orthorhombic | Cd, Zn |
| 1418 | OKIVAG01 | 457.42  | 4.81  | 0.32 | 1.31 | 0.12 | tetragonal   | Cd     |
| 1419 | BORBEQ   | 896.90  | 6.04  | 0.43 | 1.10 | 0.25 | orthorhombic | Na, Ni |
| 1420 | RUWXAJ   | 450.24  | 5.30  | 0.32 | 1.53 | 0.15 | triclinic    | La     |
| 1421 | KAXQOR   | 168.06  | 4.23  | 0.23 | 1.55 | 0.06 | other        | Ca     |
| 1422 | MIHLAR   | 443.57  | 5.60  | 0.24 | 1.34 | 0.11 | other        | La     |
| 1423 | KIPJOK   | 581.78  | 7.03  | 0.35 | 1.64 | 0.14 | other        | Nd     |
| 1424 | LUSHUD   | 659.24  | 5.03  | 0.40 | 1.27 | 0.21 | triclinic    | Mn     |
| 1425 | XOJWEZ   | 409.01  | 5.54  | 0.29 | 1.41 | 0.16 | triclinic    | Cu     |
| 1426 | IBUDOZ   | 419.56  | 4.57  | 0.34 | 1.49 | 0.17 | other        | Cu     |
| 1427 | MEFYUT   | 1397.90 | 5.59  | 0.58 | 1.19 | 0.37 | other        | Zn     |
| 1428 | NEVVEQ   | 272.88  | 4.23  | 0.36 | 1.57 | 0.13 | other        | Co     |
| 1429 | QAQRUW01 | 1974.91 | 6.61  | 0.62 | 0.85 | 0.52 | triclinic    | Mg     |
| 1430 | FIJDIM   | 844.35  | 5.54  | 0.50 | 1.25 | 0.26 | triclinic    | Mn     |
| 1431 | YARSAN   | 485.06  | 4.70  | 0.36 | 1.29 | 0.11 | orthorhombic | Zn     |
| 1432 | CAYKEU   | 611.86  | 6.72  | 0.49 | 1.66 | 0.17 | other        | Pr     |
| 1433 | ZnBDC    | 996.80  | 5.79  | 0.55 | 1.21 | 0.33 | other        | Zn     |
| 1434 | FATKIW   | 314.23  | 5.07  | 0.32 | 1.89 | 0.10 | monoclinic   | Sm     |
| 1435 | PIJJOI   | 611.74  | 6.26  | 0.35 | 1.09 | 0.18 | orthorhombic | Zn     |
| 1436 | TEJGIA01 | 313.45  | 4.23  | 0.31 | 1.88 | 0.10 | monoclinic   | Sm     |
| 1437 | GEDQIR   | 2038.54 | 6.20  | 0.67 | 1.05 | 0.49 | triclinic    | Nd     |
| 1438 | LUKRIS   | 222.46  | 5.42  | 0.18 | 1.39 | 0.06 | other        | Co     |
| 1439 | LAGQOB   | 1053.85 | 4.68  | 0.54 | 1.33 | 0.30 | triclinic    | Gd     |



|      |          |         |      |      |      |      |              |            |
|------|----------|---------|------|------|------|------|--------------|------------|
| 1440 | KEYYET   | 613.34  | 4.88 | 0.53 | 2.73 | 0.13 | cubic        | Mn, Re, Se |
| 1441 | LEVNOQ   | 1152.32 | 5.86 | 0.55 | 0.95 | 0.32 | triclinic    | Mg         |
| 1442 | QOKCID   | 160.70  | 4.26 | 0.17 | 1.71 | 0.06 | triclinic    | Zn         |
| 1443 | MEJQOJ   | 305.55  | 4.90 | 0.43 | 1.21 | 0.12 | orthorhombic | Zn         |
| 1444 | DAXNOG   | 885.32  | 5.52 | 0.53 | 1.27 | 0.28 | triclinic    | Zn         |
| 1445 | FOHCIP   | 499.27  | 4.83 | 0.40 | 1.88 | 0.17 | orthorhombic | Cd, Hg     |
| 1446 | OCIZIL   | 195.42  | 4.90 | 0.19 | 1.34 | 0.04 | orthorhombic | Zn         |
| 1447 | UMEXUF   | 820.70  | 5.84 | 0.53 | 1.62 | 0.24 | other        | Zn         |
| 1448 | TARVOX   | 365.56  | 4.78 | 0.27 | 1.56 | 0.11 | triclinic    | Co         |
| 1449 | CUMDOE   | 616.08  | 5.66 | 0.35 | 1.60 | 0.17 | monoclinic   | Nd         |
| 1450 | FIPXEJ   | 99.24   | 4.20 | 0.29 | 1.36 | 0.02 | other        | Zn         |
| 1451 | DUBWON   | 1225.90 | 5.20 | 0.58 | 1.27 | 0.35 | other        | Zn         |
| 1452 | DOLXOR01 | 2134.31 | 6.56 | 0.56 | 1.08 | 0.58 | triclinic    | Cu         |
| 1453 | QADBII   | 278.15  | 4.96 | 0.26 | 1.43 | 0.10 | orthorhombic | Sn         |
| 1454 | GUNFAW01 | 3504.13 | 9.61 | 0.74 | 0.66 | 1.12 | cubic        | Cr, Mn     |
| 1455 | GEDRUE   | 1787.16 | 6.06 | 0.65 | 1.12 | 0.42 | triclinic    | Nd         |
| 1456 | LABPOV   | 190.89  | 5.39 | 0.16 | 1.71 | 0.05 | other        | Nd         |
| 1457 | DOLXOR02 | 2136.93 | 6.57 | 0.56 | 1.08 | 0.59 | triclinic    | Cu         |
| 1458 | DOLXOR   | 2123.98 | 6.55 | 0.56 | 1.09 | 0.59 | triclinic    | Cu         |
| 1459 | HOGSIG   | 671.54  | 5.41 | 0.37 | 1.20 | 0.23 | triclinic    | Ni         |
| 1460 | LEGGIO   | 1109.85 | 5.37 | 0.53 | 1.17 | 0.27 | other        | Zn         |
| 1461 | OKIWEL01 | 451.03  | 4.78 | 0.32 | 1.32 | 0.12 | tetragonal   | Cd         |
| 1462 | RATSAI   | 497.99  | 5.47 | 0.45 | 1.77 | 0.15 | orthorhombic | Dy         |
| 1463 | QOMDUS   | 677.66  | 5.37 | 0.43 | 1.57 | 0.21 | triclinic    | Zn         |
| 1464 | KAHNOX   | 2145.37 | 6.56 | 0.56 | 1.09 | 0.59 | triclinic    | Cu         |
| 1465 | HAPVEB   | 339.48  | 4.39 | 0.42 | 2.77 | 0.09 | orthorhombic | Nd, U      |
| 1466 | CUVGIK   | 1207.04 | 5.52 | 0.56 | 1.03 | 0.39 | triclinic    | Mn         |
| 1467 | PARMIG   | 376.67  | 4.71 | 0.48 | 1.33 | 0.17 | other        | Ni         |
| 1468 | ROGLOP   | 607.52  | 5.33 | 0.36 | 1.25 | 0.22 | triclinic    | Ni         |
| 1469 | PEDMOB   | 518.92  | 6.14 | 0.37 | 1.48 | 0.15 | orthorhombic | Cu         |
| 1470 | WODFOL   | 211.22  | 4.20 | 0.29 | 1.51 | 0.10 | orthorhombic | Co         |
| 1471 | RUWWUC   | 410.71  | 5.19 | 0.36 | 1.55 | 0.14 | triclinic    | La         |
| 1472 | GEWXAJ   | 274.98  | 4.63 | 0.24 | 1.70 | 0.09 | triclinic    | Cu         |
| 1473 | TOHZAS   | 1273.62 | 5.27 | 0.57 | 1.21 | 0.37 | triclinic    | Cd         |
| 1474 | VIZRIH   | 239.83  | 5.97 | 0.19 | 1.59 | 0.06 | orthorhombic | Zn         |
| 1475 | GIYSOX   | 513.70  | 5.57 | 0.33 | 1.47 | 0.16 | monoclinic   | Cu, Mo     |
| 1476 | EFOSUO   | 953.70  | 5.18 | 0.56 | 2.23 | 0.21 | cubic        | Mn, Re     |
| 1477 | VUHJAK   | 168.42  | 4.34 | 0.26 | 1.92 | 0.06 | other        | Cu         |
| 1478 | DEKHEH   | 1016.39 | 5.44 | 0.46 | 1.07 | 0.29 | monoclinic   | Mn         |
| 1479 | RAZXIA   | 607.97  | 7.79 | 0.40 | 1.56 | 0.17 | triclinic    | Co, K      |
| 1480 | EYULOA   | 467.36  | 5.05 | 0.34 | 1.27 | 0.13 | orthorhombic | Co         |
| 1481 | TANBOZ   | 2270.42 | 6.54 | 0.55 | 1.06 | 0.57 | other        | Cu         |
| 1482 | ZAVPIX   | 1058.88 | 5.42 | 0.50 | 1.28 | 0.28 | triclinic    | Ce         |
| 1483 | XUNGOD   | 381.96  | 4.96 | 0.44 | 1.03 | 0.16 | triclinic    | Li         |
| 1484 | LUSHOX02 | 945.40  | 5.61 | 0.51 | 1.19 | 0.27 | other        | Mn         |

|         |          |         |       |      |      |      |              |        |
|---------|----------|---------|-------|------|------|------|--------------|--------|
| 1485    | IFEQAN   | 453.20  | 8.77  | 0.28 | 1.35 | 0.15 | triclinic    | Zn     |
| 1486    | KINQAB   | 324.66  | 4.90  | 0.26 | 1.13 | 0.10 | triclinic    | Ni     |
| 1487    | BAEDTA01 | 128.48  | 5.32  | 0.21 | 2.14 | 0.04 | other        | Ba     |
| 1488    | HURGUX01 | 322.58  | 5.17  | 0.31 | 1.33 | 0.11 | other        | Ni     |
| 1489    | IBUYAH   | 91.57   | 4.47  | 0.12 | 1.49 | 0.02 | other        | Zn     |
| 1490    | HIZQEN   | 563.17  | 4.99  | 0.46 | 1.50 | 0.19 | triclinic    | Cd     |
| 1491    | MAKXAZ   | 614.33  | 4.93  | 0.35 | 1.27 | 0.17 | triclinic    | Zn     |
| 1492    | QIGBIR   | 797.99  | 5.10  | 0.55 | 2.31 | 0.18 | orthorhombic | Mn, Re |
| 1493    | KEGYAX   | 70.60   | 3.74  | 0.21 | 2.50 | 0.03 | triclinic    | Ag     |
| 1494    | ZEXKUK   | 1014.73 | 5.44  | 0.46 | 1.10 | 0.29 | monoclinic   | Co     |
| 1495    | TONBOO   | 274.79  | 4.20  | 0.29 | 1.34 | 0.10 | other        | Co     |
| 1496    | TEBSAW   | 665.35  | 5.32  | 0.42 | 1.23 | 0.24 | other        | Zn     |
| 1497    | XIHRIQ   | 481.56  | 5.03  | 0.39 | 1.11 | 0.16 | triclinic    | Co     |
| 1498    | MIHLOF   | 405.17  | 5.27  | 0.24 | 1.36 | 0.11 | triclinic    | Sm     |
| 1499    | MEKDUC   | 343.61  | 4.66  | 0.36 | 1.45 | 0.12 | other        | Cd     |
| 1500    | MABKEG   | 305.49  | 5.10  | 0.22 | 1.48 | 0.11 | triclinic    | Cu     |
| 1501    | GUYLUI   | 198.13  | 4.49  | 0.22 | 1.54 | 0.08 | triclinic    | Zn     |
| 1502    | PAQFIY   | 242.53  | 5.20  | 0.28 | 1.63 | 0.06 | orthorhombic | Cd     |
| 1503    | YUSGID   | 275.03  | 4.50  | 0.26 | 1.45 | 0.09 | triclinic    | Zn     |
| 1504    | FEWGUL   | 306.57  | 4.32  | 0.26 | 1.64 | 0.05 | monoclinic   | La     |
| 1505    | VEHPUU   | 728.79  | 6.38  | 0.34 | 1.30 | 0.22 | other        | Cu     |
| 1506    | HURGUX   | 322.63  | 5.19  | 0.31 | 1.33 | 0.13 | other        | Ni     |
| 1507    | RESSAK   | 574.17  | 5.00  | 0.37 | 1.18 | 0.20 | triclinic    | Ni     |
| 1508    | YAYLER   | 187.28  | 4.81  | 0.33 | 3.91 | 0.05 | triclinic    | Ba, U  |
| 1509    | NACVUI   | 615.06  | 4.52  | 0.40 | 1.16 | 0.26 | other        | Cu     |
| 1510    | TEPGUS   | 496.09  | 4.85  | 0.39 | 1.29 | 0.18 | orthorhombic | Zn     |
| 1511    | HIWKEE   | 440.16  | 5.34  | 0.36 | 1.18 | 0.12 | triclinic    | Mn, Nb |
| 1512    | KATDAM   | 224.28  | 6.29  | 0.15 | 1.41 | 0.06 | other        | Cd     |
| 1513    | BAWRUO   | 466.52  | 7.30  | 0.53 | 2.72 | 0.14 | triclinic    | U      |
| 1514    | UDICAN   | 123.53  | 4.41  | 0.36 | 3.60 | 0.03 | other        | Bi     |
| 1515    | CEYPUT   | 605.05  | 5.14  | 0.46 | 1.21 | 0.24 | other        | Co     |
| 1516    | NOFHUM   | 276.94  | 4.15  | 0.40 | 1.17 | 0.10 | orthorhombic | Zn     |
| 1517    | RIPNIP   | 728.72  | 5.36  | 0.41 | 1.55 | 0.19 | monoclinic   | Zn     |
| 1518    | LIDZOP   | 243.89  | 4.91  | 0.29 | 1.65 | 0.10 | other        | Sr     |
| 1519    | GIYSEN   | 547.89  | 5.55  | 0.34 | 1.45 | 0.17 | monoclinic   | Cu, Mo |
| DUT-67  | DUT-67g  | 1791.89 | 17.05 | 0.66 | 0.99 | 0.27 | cubic        | Zr     |
| NU1000  | NU1000   | 3159.34 | 29.72 | 0.84 | 0.47 | 1.10 | other        | Zr     |
| NU100   | NU100g   | 5747.30 | 28.78 | 0.92 | 0.28 | 2.25 | cubic        | Cu     |
| NU110   | NU110g   | 6025.48 | 30.83 | 0.94 | 0.24 | 2.80 | cubic        | Cu     |
| PCN-68  | PCN-68g  | 4801.47 | 20.91 | 0.86 | 0.40 | 1.19 | cubic        | Cu     |
| PCN-777 | PCN-777g | 3019.65 | 33.63 | 0.90 | 0.27 | 3.12 | cubic        | Zr     |
| UiO66   | UiO66    | 1030.96 | 8.46  | 0.55 | 1.22 | 0.06 | cubic        | Zr     |
| UiO67   | UiO67    | 2729.82 | 12.20 | 0.75 | 0.76 | 0.31 | cubic        | Zr     |
